# Supplementary material for: Evidence of a pan-tissue decline in stemness during human aging
Source: publisher site journal article supplement (doi:10.18632/aging.205717), 2024-04-04
Supplement: Supplementary file [file aging-v16i7-205717-supplementary-material-SD1.pdf]

**SUPPLEMENTARY FIGURES**

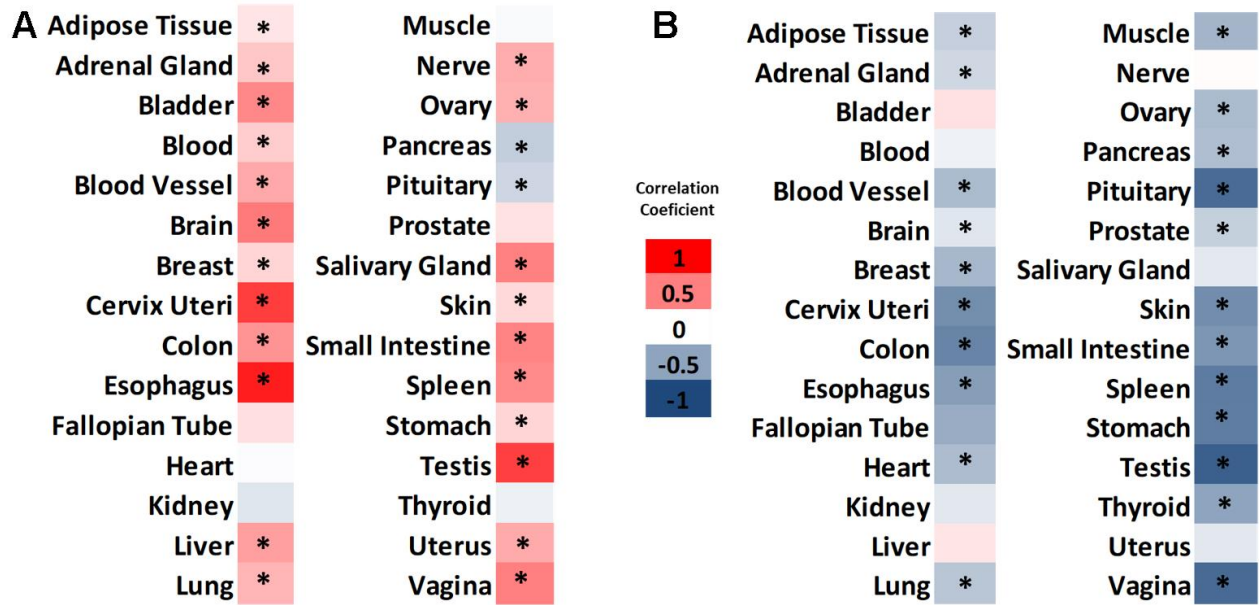

**Supplementary Figure 1.** Validation of the relationship between stemness and (A) cellular proliferation and (B) and cellular senescence. (A) Heatmap of Pearson’s correlation coefficient between stemness scores and alternative proliferation signature expression. (B) Heatmap of Pearson’s correlation coefficient between stemness score and alternative senescence signature. \*FDR <0.05.

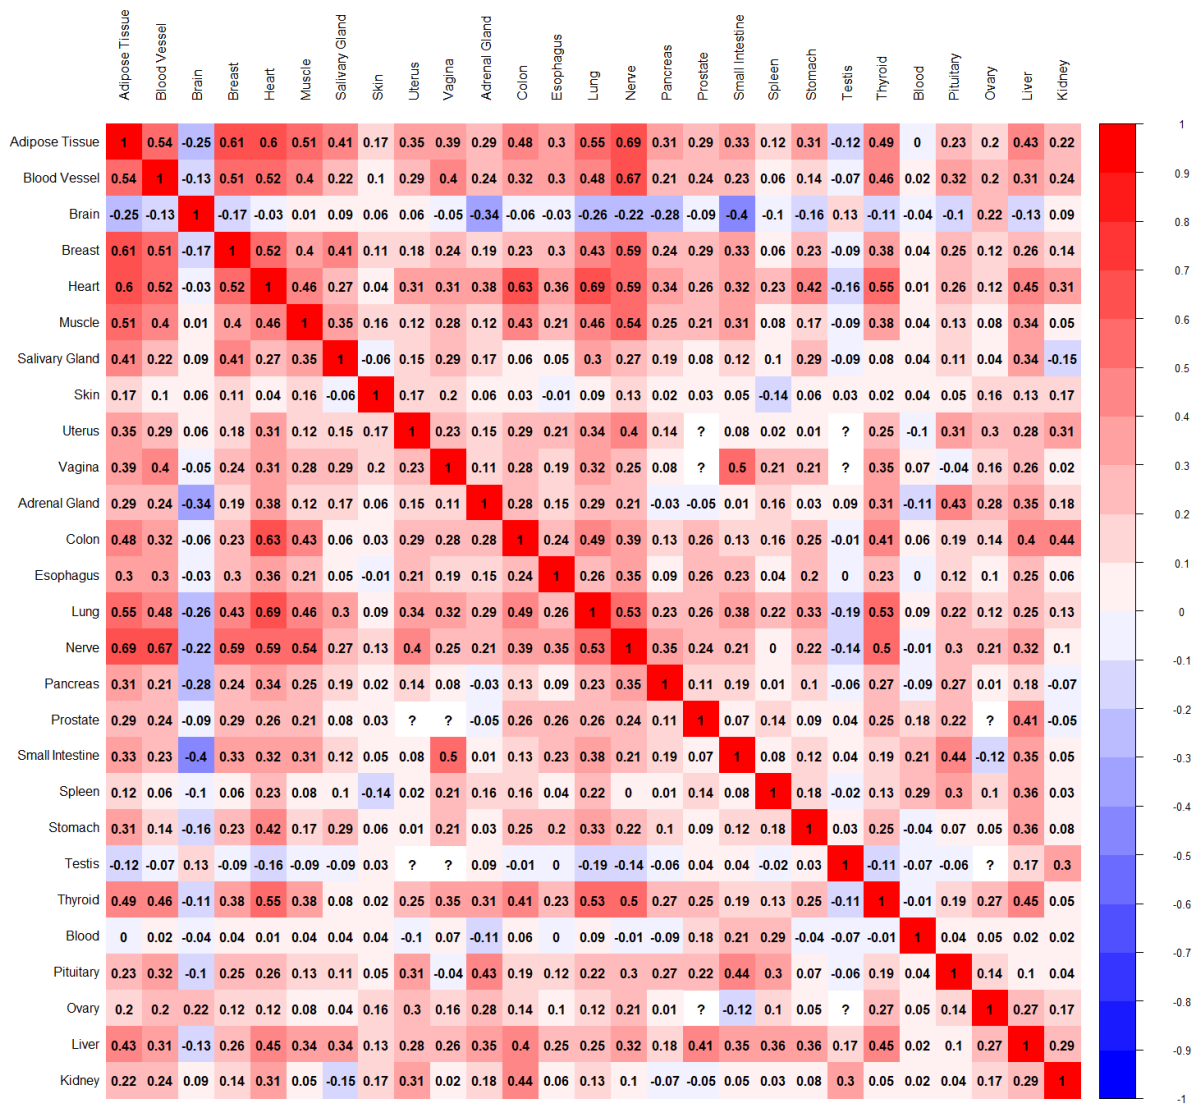

**Supplementary Figure 2. Stemness in same individual.** Correlation matrix between stemness across tissues from the same individual including all from GTEx with more than 50 samples.
