# Supplementary material for: Evidence of a pan-tissue decline in stemness during human aging
Source: Aging (Albany NY). 2024 Apr 4;16(7):5796–810. doi: 10.18632/aging.205717 (PMC11042951; doi:10.18632/aging.205717)
Supplement: Supplementary Table 1 [file aging-16-205717-s002.xlsx]

## Sheet: Corr. Stemness x Proliferation
Supplementary Table 1. Stemness scores and features of all GTEx samples.
Main proliferation (MKI67)						Alternative proliferation signature
Tissues	Pearson correlation coefficient	p-value	FDR			Tissues	Pearson correlation coefficient	p-value	FDR
Adipose Tissue	0.00767241	0.790278	0.817529			Adipose Tissue	0.104862	0.000267554	0.000401331
Adrenal Gland	0.173376	0.00523043	0.00747204			Adrenal Gland	0.221002	0.000347679	0.000496684
Bladder	0.233839	0.307632	0.38454			Bladder	0.469076	0.0319433	0.0399292
Blood	0.358187	2.84476e-24	1.21918e-23			Blood	0.198862	3.58326e-08	8.26906e-08
Blood Vessel	-0.0997034	0.000263662	0.000416309			Blood Vessel	0.333378	5.14132e-36	3.85599e-35
Brain	-0.125326	1.01802e-10	2.77642e-10			Brain	0.519985	5.74312e-183	8.61468e-182
Breast	-0.0155864	0.739107	0.7919			Breast	0.162577	0.000470698	0.000641861
Cervix Uteri	0.775161	9.68787e-05	0.000170962			Cervix Uteri	0.760547	0.000156734	0.000261224
Colon	0.792182	8.243e-169	1.23645e-167			Colon	0.422672	4.18728e-35	2.51237e-34
Esophagus	0.917861	0	0			Esophagus	0.887881	0	0
Fallopian Tube	0.158361	0.684055	0.760061			Fallopian Tube	0.123536	0.751513	0.751513
Heart	0.0269061	0.430407	0.516488			Heart	-0.0120981	0.722973	0.747903
Kidney	0.014671	0.891461	0.891461			Kidney	-0.135416	0.205769	0.228632
Liver	0.250847	0.000138258	0.000230429			Liver	0.372852	7.29304e-09	1.82326e-08
Lung	0.198637	1.48493e-06	2.96986e-06			Lung	0.290076	1.14126e-12	4.27972e-12
Muscle	-0.147601	2.67971e-05	5.02446e-05			Muscle	-0.0249108	0.480864	0.515211
Nerve	-0.225265	1.46018e-08	3.36964e-08			Nerve	0.324966	1.08682e-16	5.43408e-16
Ovary	0.052928	0.480405	0.554313			Ovary	0.308795	2.46922e-05	4.62978e-05
Pancreas	-0.268715	7.84423e-07	1.68091e-06			Pancreas	-0.265419	1.08082e-06	2.16163e-06
Pituitary	-0.425896	6.74087e-14	2.24696e-13			Pituitary	-0.220868	0.00018004	0.000284273
Prostate	0.183494	0.00395214	0.00592821			Prostate	0.117087	0.0673048	0.0776594
Salivary Gland	0.470262	2.71874e-10	6.79686e-10			Salivary Gland	0.495772	1.97436e-11	5.92308e-11
Skin	0.196789	7.36895e-13	2.21068e-12			Skin	0.147112	9.37924e-08	2.00984e-07
Small Intestine	0.8076	2.6927e-44	2.6927e-43			Small Intestine	0.485503	1.88608e-12	6.28694e-12
Spleen	0.524906	1.8208e-18	6.82799e-18			Spleen	0.455115	1.00501e-13	4.30717e-13
Stomach	0.571565	1.59439e-32	1.1958e-31			Stomach	0.164839	0.00172544	0.00225057
Testis	0.562246	1.78023e-31	1.06814e-30			Testis	0.751354	8.70665e-67	8.70665e-66
Thyroid	0.0737438	0.059647	0.0778004			Thyroid	-0.0789971	0.0435946	0.0523135
Uterus	0.175699	0.0364845	0.0497516			Uterus	0.332237	5.3584e-05	9.456e-05
Vagina	0.700429	2.52769e-24	1.21918e-23			Vagina	0.499909	3.05061e-11	8.31986e-11
