# Supplementary material for: Evidence of a pan-tissue decline in stemness during human aging
Source: Aging (Albany NY). 2024 Apr 4;16(7):5796–810. doi: 10.18632/aging.205717 (PMC11042951; doi:10.18632/aging.205717)
Supplement: Supplementary Table 4 [file aging-16-205717-s004.xlsx]

## Sheet: Sheet1
Supplementary Table 4. Pearson correlations between stemness and proliferation for GTEx tissues.
Sample ID	Subject ID	Stemness Score	Sex	Age	Death Classification	Tissue	Tissue Site Detail
GTEX-1117F-0226-SM-5GZZ7	GTEX-1117F	0.132485	Female	65	Slow Death	Adipose Tissue	Adipose - Subcutaneous
GTEX-1117F-0426-SM-5EGHI	GTEX-1117F	0.378931	Female	65	Slow Death	Muscle	Muscle - Skeletal
GTEX-1117F-0526-SM-5EGHJ	GTEX-1117F	0.180587	Female	65	Slow Death	Blood Vessel	Artery - Tibial
GTEX-1117F-0626-SM-5N9CS	GTEX-1117F	0.0747363	Female	65	Slow Death	Blood Vessel	Artery - Coronary
GTEX-1117F-0726-SM-5GIEN	GTEX-1117F	0.0876714	Female	65	Slow Death	Heart	Heart - Atrial Appendage
GTEX-1117F-1326-SM-5EGHH	GTEX-1117F	0.127332	Female	65	Slow Death	Adipose Tissue	Adipose - Visceral (Omentum)
GTEX-1117F-2426-SM-5EGGH	GTEX-1117F	0.085137	Female	65	Slow Death	Uterus	Uterus
GTEX-1117F-2526-SM-5GZY6	GTEX-1117F	0.327308	Female	65	Slow Death	Vagina	Vagina
GTEX-1117F-2826-SM-5GZXL	GTEX-1117F	0.181872	Female	65	Slow Death	Breast	Breast - Mammary Tissue
GTEX-1117F-2926-SM-5GZYI	GTEX-1117F	0.249031	Female	65	Slow Death	Skin	Skin - Not Sun Exposed (Suprapubic)
GTEX-1117F-3026-SM-5GZYU	GTEX-1117F	0.264803	Female	65	Slow Death	Salivary Gland	Minor Salivary Gland
GTEX-1117F-3226-SM-5N9CT	GTEX-1117F	0.445462	Female	65	Slow Death	Brain	Brain - Cortex
GTEX-111CU-0126-SM-5GZWZ	GTEX-111CU	0.282918	Male	55	Ventilator Case	Adrenal Gland	Adrenal Gland
GTEX-111CU-0226-SM-5GZXC	GTEX-111CU	0.284263	Male	55	Ventilator Case	Thyroid	Thyroid
GTEX-111CU-0326-SM-5GZXO	GTEX-111CU	0.33125	Male	55	Ventilator Case	Lung	Lung
GTEX-111CU-0426-SM-5GZY1	GTEX-111CU	0.373755	Male	55	Ventilator Case	Spleen	Spleen
GTEX-111CU-0526-SM-5EGHK	GTEX-111CU	0.413535	Male	55	Ventilator Case	Pancreas	Pancreas
GTEX-111CU-0626-SM-5EGHL	GTEX-111CU	0.187475	Male	55	Ventilator Case	Esophagus	Esophagus - Muscularis
GTEX-111CU-0726-SM-5GZYD	GTEX-111CU	0.407352	Male	55	Ventilator Case	Esophagus	Esophagus - Mucosa
GTEX-111CU-0826-SM-5EGIJ	GTEX-111CU	0.190709	Male	55	Ventilator Case	Esophagus	Esophagus - Gastroesophageal Junction
GTEX-111CU-0926-SM-5EGIK	GTEX-111CU	0.442848	Male	55	Ventilator Case	Stomach	Stomach
GTEX-111CU-1026-SM-5EGIL	GTEX-111CU	0.212015	Male	55	Ventilator Case	Adipose Tissue	Adipose - Visceral (Omentum)
GTEX-111CU-1126-SM-5EGIM	GTEX-111CU	0.322425	Male	55	Ventilator Case	Skin	Skin - Not Sun Exposed (Suprapubic)
GTEX-111CU-1226-SM-5EGIN	GTEX-111CU	0.170656	Male	55	Ventilator Case	Colon	Colon - Sigmoid
GTEX-111CU-1326-SM-5NQ8L	GTEX-111CU	0.176991	Male	55	Ventilator Case	Small Intestine	Small Intestine - Terminal Ileum
GTEX-111CU-1426-SM-5GZYP	GTEX-111CU	0.487769	Male	55	Ventilator Case	Colon	Colon - Transverse
GTEX-111CU-1526-SM-5N9FS	GTEX-111CU	0.179392	Male	55	Ventilator Case	Prostate	Prostate
GTEX-111CU-1726-SM-5EGHM	GTEX-111CU	0.54795	Male	55	Ventilator Case	Testis	Testis
GTEX-111CU-1826-SM-5GZYN	GTEX-111CU	0.207887	Male	55	Ventilator Case	Adipose Tissue	Adipose - Subcutaneous
GTEX-111CU-2026-SM-5GZZC	GTEX-111CU	0.470873	Male	55	Ventilator Case	Muscle	Muscle - Skeletal
GTEX-111CU-2226-SM-5N9G5	GTEX-111CU	0.195787	Male	55	Ventilator Case	Nerve	Nerve - Tibial
GTEX-111FC-0126-SM-5N9DL	GTEX-111FC	0.372505	Male	65	Violent and Fast Death	Skin	Skin - Sun Exposed (Lower leg)
GTEX-111FC-0226-SM-5N9B8	GTEX-111FC	0.112111	Male	65	Violent and Fast Death	Adipose Tissue	Adipose - Subcutaneous
GTEX-111FC-0326-SM-5GZZ1	GTEX-111FC	0.353085	Male	65	Violent and Fast Death	Muscle	Muscle - Skeletal
GTEX-111FC-0426-SM-5N9CV	GTEX-111FC	0.0802528	Male	65	Violent and Fast Death	Blood Vessel	Artery - Tibial
GTEX-111FC-0526-SM-5GZZ8	GTEX-111FC	0.127779	Male	65	Violent and Fast Death	Nerve	Nerve - Tibial
GTEX-111FC-0626-SM-5N9CU	GTEX-111FC	0.141246	Male	65	Violent and Fast Death	Heart	Heart - Atrial Appendage
GTEX-111FC-0826-SM-5GZWO	GTEX-111FC	0.157612	Male	65	Violent and Fast Death	Heart	Heart - Left Ventricle
GTEX-111FC-1026-SM-5GZX1	GTEX-111FC	0.215769	Male	65	Violent and Fast Death	Thyroid	Thyroid
GTEX-111FC-1126-SM-5GZWU	GTEX-111FC	0.0814215	Male	65	Violent and Fast Death	Lung	Lung
GTEX-111FC-1326-SM-5N9D9	GTEX-111FC	0.209913	Male	65	Violent and Fast Death	Spleen	Spleen
GTEX-111FC-1926-SM-5GZYC	GTEX-111FC	0.524851	Male	65	Violent and Fast Death	Testis	Testis
GTEX-111FC-2026-SM-5GZYO	GTEX-111FC	0.181974	Male	65	Violent and Fast Death	Prostate	Prostate
GTEX-111FC-2526-SM-5GZXU	GTEX-111FC	0.185025	Male	65	Violent and Fast Death	Skin	Skin - Not Sun Exposed (Suprapubic)
GTEX-111FC-2926-SM-5GZY7	GTEX-111FC	0.273419	Male	65	Violent and Fast Death	Salivary Gland	Minor Salivary Gland
GTEX-111FC-3126-SM-5GZZ2	GTEX-111FC	0.475714	Male	65	Violent and Fast Death	Brain	Brain - Cortex
GTEX-111FC-3326-SM-5GZYV	GTEX-111FC	0.507449	Male	65	Violent and Fast Death	Brain	Brain - Cerebellum
GTEX-111VG-0008-SM-5Q5BG	GTEX-111VG	0.421225	Male	65	Intermediate Death	Skin	Cells - Cultured fibroblasts
GTEX-111VG-0326-SM-5GZX7	GTEX-111VG	0.0639066	Male	65	Intermediate Death	Heart	Heart - Atrial Appendage
GTEX-111VG-0526-SM-5N9BW	GTEX-111VG	0.150136	Male	65	Intermediate Death	Thyroid	Thyroid
GTEX-111VG-0726-SM-5GIDC	GTEX-111VG	0.0077283	Male	65	Intermediate Death	Lung	Lung
GTEX-111VG-1626-SM-5EGIO	GTEX-111VG	0.449094	Male	65	Intermediate Death	Skin	Skin - Not Sun Exposed (Suprapubic)
GTEX-111VG-1926-SM-5GIDO	GTEX-111VG	0.61954	Male	65	Intermediate Death	Testis	Testis
GTEX-111VG-2226-SM-5N9DU	GTEX-111VG	0.0380292	Male	65	Intermediate Death	Colon	Colon - Transverse
GTEX-111VG-2326-SM-5N9BK	GTEX-111VG	0.145907	Male	65	Intermediate Death	Adipose Tissue	Adipose - Subcutaneous
GTEX-111VG-2426-SM-5GZXD	GTEX-111VG	0.269628	Male	65	Intermediate Death	Skin	Skin - Sun Exposed (Lower leg)
GTEX-111VG-2526-SM-5GZXP	GTEX-111VG	0.109982	Male	65	Intermediate Death	Nerve	Nerve - Tibial
GTEX-111VG-2626-SM-5GZY2	GTEX-111VG	0.380319	Male	65	Intermediate Death	Muscle	Muscle - Skeletal
GTEX-111YS-0006-SM-5NQBE	GTEX-111YS	0.520301	Male	65	Ventilator Case	Blood	Whole Blood
GTEX-111YS-0008-SM-5Q5BH	GTEX-111YS	0.288032	Male	65	Ventilator Case	Skin	Cells - Cultured fibroblasts
GTEX-111YS-0126-SM-5987T	GTEX-111YS	0.318721	Male	65	Ventilator Case	Adrenal Gland	Adrenal Gland
GTEX-111YS-0326-SM-5GZZ3	GTEX-111YS	0.21605	Male	65	Ventilator Case	Heart	Heart - Atrial Appendage
GTEX-111YS-0426-SM-5987O	GTEX-111YS	0.273192	Male	65	Ventilator Case	Heart	Heart - Left Ventricle
GTEX-111YS-0526-SM-5GZXJ	GTEX-111YS	0.0988934	Male	65	Ventilator Case	Blood Vessel	Artery - Aorta
GTEX-111YS-0626-SM-5GZXV	GTEX-111YS	0.174223	Male	65	Ventilator Case	Lung	Lung
GTEX-111YS-0726-SM-5GZY8	GTEX-111YS	0.212387	Male	65	Ventilator Case	Thyroid	Thyroid
GTEX-111YS-0826-SM-5GZYK	GTEX-111YS	0.166651	Male	65	Ventilator Case	Esophagus	Esophagus - Gastroesophageal Junction
GTEX-111YS-0926-SM-5EGGI	GTEX-111YS	0.50896	Male	65	Ventilator Case	Esophagus	Esophagus - Mucosa
GTEX-111YS-1026-SM-5GZYE	GTEX-111YS	0.164298	Male	65	Ventilator Case	Esophagus	Esophagus - Muscularis
GTEX-111YS-1126-SM-5GZYQ	GTEX-111YS	0.323383	Male	65	Ventilator Case	Stomach	Stomach
GTEX-111YS-1226-SM-5EGGJ	GTEX-111YS	0.395578	Male	65	Ventilator Case	Pancreas	Pancreas
GTEX-111YS-1326-SM-5EGGK	GTEX-111YS	0.244853	Male	65	Ventilator Case	Adipose Tissue	Adipose - Visceral (Omentum)
GTEX-111YS-1426-SM-5GID8	GTEX-111YS	0.34217	Male	65	Ventilator Case	Small Intestine	Small Intestine - Terminal Ileum
GTEX-111YS-1526-SM-5GZYW	GTEX-111YS	0.354688	Male	65	Ventilator Case	Skin	Skin - Not Sun Exposed (Suprapubic)
GTEX-111YS-1626-SM-5GZZ9	GTEX-111YS	0.186975	Male	65	Ventilator Case	Colon	Colon - Transverse
GTEX-111YS-1726-SM-5GIED	GTEX-111YS	0.135769	Male	65	Ventilator Case	Prostate	Prostate
GTEX-111YS-1826-SM-5GIEP	GTEX-111YS	0.195359	Male	65	Ventilator Case	Colon	Colon - Sigmoid
GTEX-111YS-1926-SM-5GICC	GTEX-111YS	0.192943	Male	65	Ventilator Case	Breast	Breast - Mammary Tissue
GTEX-111YS-2026-SM-5EGGL	GTEX-111YS	0.56111	Male	65	Ventilator Case	Testis	Testis
GTEX-111YS-2126-SM-5EGGM	GTEX-111YS	0.165186	Male	65	Ventilator Case	Nerve	Nerve - Tibial
GTEX-111YS-2226-SM-5987P	GTEX-111YS	0.107083	Male	65	Ventilator Case	Blood Vessel	Artery - Tibial
GTEX-111YS-2326-SM-5987L	GTEX-111YS	0.397236	Male	65	Ventilator Case	Muscle	Muscle - Skeletal
GTEX-111YS-2426-SM-5GZZQ	GTEX-111YS	0.198706	Male	65	Ventilator Case	Adipose Tissue	Adipose - Subcutaneous
GTEX-1122O-0003-SM-5Q5DL	GTEX-1122O	0.90361	Female	65	Ventilator Case	Blood	Cells - EBV-transformed lymphocytes
GTEX-1122O-0005-SM-5O99J	GTEX-1122O	0.496469	Female	65	Ventilator Case	Blood	Whole Blood
GTEX-1122O-0008-SM-5QGR2	GTEX-1122O	0.43183	Female	65	Ventilator Case	Skin	Cells - Cultured fibroblasts
GTEX-1122O-0126-SM-5GICA	GTEX-1122O	0.201367	Female	65	Ventilator Case	Lung	Lung
GTEX-1122O-0226-SM-5N9DA	GTEX-1122O	0.223511	Female	65	Ventilator Case	Thyroid	Thyroid
GTEX-1122O-0326-SM-5H124	GTEX-1122O	0.310984	Female	65	Ventilator Case	Adrenal Gland	Adrenal Gland
GTEX-1122O-0426-SM-5H12G	GTEX-1122O	0.114285	Female	65	Ventilator Case	Blood Vessel	Artery - Coronary
GTEX-1122O-0526-SM-5N9DM	GTEX-1122O	0.346186	Female	65	Ventilator Case	Spleen	Spleen
GTEX-1122O-0626-SM-5N9B9	GTEX-1122O	0.231234	Female	65	Ventilator Case	Heart	Heart - Atrial Appendage
GTEX-1122O-0726-SM-5GIEV	GTEX-1122O	0.391017	Female	65	Ventilator Case	Pancreas	Pancreas
GTEX-1122O-0826-SM-5GICV	GTEX-1122O	0.266057	Female	65	Ventilator Case	Heart	Heart - Left Ventricle
GTEX-1122O-0926-SM-9YFLC	GTEX-1122O	0.288667	Female	65	Ventilator Case	Adipose Tissue	Adipose - Visceral (Omentum)
GTEX-1122O-1026-SM-9WYSF	GTEX-1122O	0.377866	Female	65	Ventilator Case	Skin	Skin - Not Sun Exposed (Suprapubic)
GTEX-1122O-1126-SM-5NQ8X	GTEX-1122O	0.122743	Female	65	Ventilator Case	Blood Vessel	Artery - Aorta
GTEX-1122O-1226-SM-5H113	GTEX-1122O	0.15489	Female	65	Ventilator Case	Breast	Breast - Mammary Tissue
GTEX-1122O-1326-SM-5H11F	GTEX-1122O	0.361116	Female	65	Ventilator Case	Small Intestine	Small Intestine - Terminal Ileum
GTEX-1122O-1426-SM-5H11R	GTEX-1122O	0.203182	Female	65	Ventilator Case	Colon	Colon - Sigmoid
GTEX-1122O-1526-SM-5N9CL	GTEX-1122O	0.383605	Female	65	Ventilator Case	Colon	Colon - Transverse
GTEX-1122O-1626-SM-5N9CX	GTEX-1122O	0.177207	Female	65	Ventilator Case	Esophagus	Esophagus - Muscularis
GTEX-1122O-1726-SM-5GICM	GTEX-1122O	0.42242	Female	65	Ventilator Case	Esophagus	Esophagus - Mucosa
GTEX-1122O-1826-SM-5EGIP	GTEX-1122O	0.163294	Female	65	Ventilator Case	Esophagus	Esophagus - Gastroesophageal Junction
GTEX-1122O-1926-SM-5EGIQ	GTEX-1122O	0.376259	Female	65	Ventilator Case	Stomach	Stomach
GTEX-1122O-2026-SM-9YFMG	GTEX-1122O	0.204052	Female	65	Ventilator Case	Adipose Tissue	Adipose - Subcutaneous
GTEX-1122O-2126-SM-5EGIR	GTEX-1122O	0.404603	Female	65	Ventilator Case	Skin	Skin - Sun Exposed (Lower leg)
GTEX-1122O-2326-SM-9YFL9	GTEX-1122O	0.116972	Female	65	Ventilator Case	Blood Vessel	Artery - Tibial
GTEX-1122O-2426-SM-5GIDN	GTEX-1122O	0.429846	Female	65	Ventilator Case	Muscle	Muscle - Skeletal
GTEX-1128S-0005-SM-5P9HI	GTEX-1128S	0.465125	Female	65	Fast Death of Natural Causes	Blood	Whole Blood
GTEX-1128S-0008-SM-5Q5DP	GTEX-1128S	0.248194	Female	65	Fast Death of Natural Causes	Skin	Cells - Cultured fibroblasts
GTEX-1128S-0126-SM-5H12S	GTEX-1128S	0.185907	Female	65	Fast Death of Natural Causes	Thyroid	Thyroid
GTEX-1128S-0326-SM-5GZZF	GTEX-1128S	0.0525933	Female	65	Fast Death of Natural Causes	Blood Vessel	Artery - Aorta
GTEX-1128S-0726-SM-5N9D6	GTEX-1128S	0.128739	Female	65	Fast Death of Natural Causes	Lung	Lung
GTEX-1128S-0826-SM-5GZZI	GTEX-1128S	0.430643	Female	65	Fast Death of Natural Causes	Pancreas	Pancreas
GTEX-1128S-0926-SM-5GZZU	GTEX-1128S	0.220668	Female	65	Fast Death of Natural Causes	Adipose Tissue	Adipose - Visceral (Omentum)
GTEX-1128S-1626-SM-5H12O	GTEX-1128S	0.34602	Female	65	Fast Death of Natural Causes	Colon	Colon - Transverse
GTEX-1128S-2126-SM-5H12U	GTEX-1128S	0.195486	Female	65	Fast Death of Natural Causes	Adipose Tissue	Adipose - Subcutaneous
GTEX-1128S-2326-SM-5GZZY	GTEX-1128S	0.304146	Female	65	Fast Death of Natural Causes	Skin	Skin - Sun Exposed (Lower leg)
GTEX-1128S-2426-SM-5H11B	GTEX-1128S	0.401006	Female	65	Fast Death of Natural Causes	Muscle	Muscle - Skeletal
GTEX-1128S-2526-SM-5H11N	GTEX-1128S	0.109156	Female	65	Fast Death of Natural Causes	Blood Vessel	Artery - Tibial
GTEX-1128S-2626-SM-5H11Z	GTEX-1128S	0.13153	Female	65	Fast Death of Natural Causes	Pituitary	Pituitary
GTEX-1128S-2726-SM-5H12C	GTEX-1128S	0.471351	Female	65	Fast Death of Natural Causes	Brain	Brain - Cortex
GTEX-1128S-2826-SM-5N9DI	GTEX-1128S	0.535628	Female	65	Fast Death of Natural Causes	Brain	Brain - Cerebellum
GTEX-113IC-0006-SM-5NQ9C	GTEX-113IC	0.574786	Male	65		Blood	Whole Blood
GTEX-113IC-0008-SM-5QGRF	GTEX-113IC	0.231632	Male	65		Skin	Cells - Cultured fibroblasts
GTEX-113IC-0126-SM-5HL6T	GTEX-113IC	0.099715	Male	65		Skin	Skin - Sun Exposed (Lower leg)
GTEX-113IC-0226-SM-5HL5C	GTEX-113IC	0.0910756	Male	65		Adipose Tissue	Adipose - Subcutaneous
GTEX-113IC-0426-SM-5HL5O	GTEX-113IC	0.10739	Male	65		Blood Vessel	Artery - Tibial
GTEX-113IC-0526-SM-5HL76	GTEX-113IC	0.0850784	Male	65		Nerve	Nerve - Tibial
GTEX-113JC-0006-SM-5O997	GTEX-113JC	0.471816	Female	55	Fast Death of Natural Causes	Blood	Whole Blood
GTEX-113JC-0008-SM-5QGR6	GTEX-113JC	0.302698	Female	55	Fast Death of Natural Causes	Skin	Cells - Cultured fibroblasts
GTEX-113JC-0126-SM-5EGJW	GTEX-113JC	0.14835	Female	55	Fast Death of Natural Causes	Thyroid	Thyroid
GTEX-113JC-0726-SM-5GZZR	GTEX-113JC	0.0601064	Female	55	Fast Death of Natural Causes	Adipose Tissue	Adipose - Visceral (Omentum)
GTEX-113JC-0926-SM-5H114	GTEX-113JC	0.0940659	Female	55	Fast Death of Natural Causes	Esophagus	Esophagus - Muscularis
GTEX-113JC-1026-SM-5H117	GTEX-113JC	0.103436	Female	55	Fast Death of Natural Causes	Esophagus	Esophagus - Gastroesophageal Junction
GTEX-113JC-1926-SM-5N9GE	GTEX-113JC	0.0806546	Female	55	Fast Death of Natural Causes	Vagina	Vagina
GTEX-113JC-2226-SM-5EGJG	GTEX-113JC	0.0403456	Female	55	Fast Death of Natural Causes	Uterus	Uterus
GTEX-113JC-2326-SM-5EQ4E	GTEX-113JC	0.264568	Female	55	Fast Death of Natural Causes	Skin	Skin - Sun Exposed (Lower leg)
GTEX-113JC-2726-SM-5EGIS	GTEX-113JC	0.335655	Female	55	Fast Death of Natural Causes	Muscle	Muscle - Skeletal
GTEX-113JC-2826-SM-5EGIT	GTEX-113JC	0.350304	Female	55	Fast Death of Natural Causes	Pituitary	Pituitary
GTEX-117XS-0005-SM-5PNU6	GTEX-117XS	0.569469	Male	65	Fast Death of Natural Causes	Blood	Whole Blood
GTEX-117XS-0008-SM-5Q5DQ	GTEX-117XS	0.27932	Male	65	Fast Death of Natural Causes	Skin	Cells - Cultured fibroblasts
GTEX-117XS-0426-SM-5GZZN	GTEX-117XS	0.0890431	Male	65	Fast Death of Natural Causes	Blood Vessel	Artery - Aorta
GTEX-117XS-0526-SM-5987Q	GTEX-117XS	0.120313	Male	65	Fast Death of Natural Causes	Thyroid	Thyroid
GTEX-117XS-0726-SM-5H131	GTEX-117XS	0.117142	Male	65	Fast Death of Natural Causes	Heart	Heart - Atrial Appendage
GTEX-117XS-1926-SM-5GICO	GTEX-117XS	0.143164	Male	65	Fast Death of Natural Causes	Breast	Breast - Mammary Tissue
GTEX-117XS-2026-SM-5GID1	GTEX-117XS	0.550899	Male	65	Fast Death of Natural Causes	Testis	Testis
GTEX-117XS-2226-SM-5GIE1	GTEX-117XS	0.0830441	Male	65	Fast Death of Natural Causes	Colon	Colon - Sigmoid
GTEX-117XS-2526-SM-5H11G	GTEX-117XS	0.362766	Male	65	Fast Death of Natural Causes	Muscle	Muscle - Skeletal
GTEX-117XS-2726-SM-5N9BL	GTEX-117XS	0.353051	Male	65	Fast Death of Natural Causes	Skin	Skin - Sun Exposed (Lower leg)
GTEX-117XS-2926-SM-5N9BX	GTEX-117XS	0.277817	Male	65	Fast Death of Natural Causes	Pituitary	Pituitary
GTEX-117XS-3026-SM-5N9CA	GTEX-117XS	0.497174	Male	65	Fast Death of Natural Causes	Brain	Brain - Cortex
GTEX-117XS-3126-SM-5GIDP	GTEX-117XS	0.533839	Male	65	Fast Death of Natural Causes	Brain	Brain - Cerebellum
GTEX-117YW-0005-SM-5NQ8Z	GTEX-117YW	0.525064	Male	55	Intermediate Death	Blood	Whole Blood
GTEX-117YW-0008-SM-5QGRD	GTEX-117YW	0.239525	Male	55	Intermediate Death	Skin	Cells - Cultured fibroblasts
GTEX-117YW-0126-SM-5EGGN	GTEX-117YW	0.164724	Male	55	Intermediate Death	Thyroid	Thyroid
GTEX-117YW-0226-SM-5N9CM	GTEX-117YW	0.0403452	Male	55	Intermediate Death	Blood Vessel	Artery - Aorta
GTEX-117YW-0326-SM-5N9CY	GTEX-117YW	0.0877279	Male	55	Intermediate Death	Heart	Heart - Left Ventricle
GTEX-117YW-0426-SM-5GZZZ	GTEX-117YW	0.0843368	Male	55	Intermediate Death	Heart	Heart - Atrial Appendage
GTEX-117YW-0526-SM-5H11C	GTEX-117YW	0.0124753	Male	55	Intermediate Death	Lung	Lung
GTEX-117YW-0826-SM-5H11O	GTEX-117YW	0.105669	Male	55	Intermediate Death	Adipose Tissue	Adipose - Visceral (Omentum)
GTEX-117YW-1426-SM-5EGGO	GTEX-117YW	0.121375	Male	55	Intermediate Death	Prostate	Prostate
GTEX-117YW-1526-SM-5EGGP	GTEX-117YW	0.553778	Male	55	Intermediate Death	Testis	Testis
GTEX-117YW-1826-SM-5PNY5	GTEX-117YW	0.345057	Male	55	Intermediate Death	Colon	Colon - Transverse
GTEX-117YW-1926-SM-5H121	GTEX-117YW	0.298998	Male	55	Intermediate Death	Esophagus	Esophagus - Mucosa
GTEX-117YW-2026-SM-5N9BH	GTEX-117YW	0.074617	Male	55	Intermediate Death	Esophagus	Esophagus - Muscularis
GTEX-117YW-2226-SM-5N9DB	GTEX-117YW	0.323617	Male	55	Intermediate Death	Stomach	Stomach
GTEX-117YW-2426-SM-5Q5AE	GTEX-117YW	0.392368	Male	55	Intermediate Death	Muscle	Muscle - Skeletal
GTEX-117YW-2626-SM-5GZZH	GTEX-117YW	0.222061	Male	55	Intermediate Death	Skin	Skin - Sun Exposed (Lower leg)
GTEX-117YW-2726-SM-5GZZT	GTEX-117YW	0.159946	Male	55	Intermediate Death	Blood Vessel	Artery - Tibial
GTEX-117YW-2826-SM-5H116	GTEX-117YW	0.287425	Male	55	Intermediate Death	Pituitary	Pituitary
GTEX-117YX-0126-SM-5EGH5	GTEX-117YX	0.284212	Male	55	Ventilator Case	Adrenal Gland	Adrenal Gland
GTEX-117YX-0226-SM-5EGH6	GTEX-117YX	0.372106	Male	55	Ventilator Case	Pancreas	Pancreas
GTEX-117YX-0326-SM-5GICL	GTEX-117YX	0.154666	Male	55	Ventilator Case	Small Intestine	Small Intestine - Terminal Ileum
GTEX-117YX-0526-SM-5EGJH	GTEX-117YX	0.210419	Male	55	Ventilator Case	Colon	Colon - Sigmoid
GTEX-117YX-0626-SM-5EGJI	GTEX-117YX	0.214016	Male	55	Ventilator Case	Heart	Heart - Atrial Appendage
GTEX-117YX-0726-SM-5GIET	GTEX-117YX	0.257308	Male	55	Ventilator Case	Adipose Tissue	Adipose - Visceral (Omentum)
GTEX-117YX-0826-SM-5H11J	GTEX-117YX	0.171737	Male	55	Ventilator Case	Colon	Colon - Transverse
GTEX-117YX-1026-SM-5H11V	GTEX-117YX	0.432522	Male	55	Ventilator Case	Stomach	Stomach
GTEX-117YX-1126-SM-5H128	GTEX-117YX	0.296178	Male	55	Ventilator Case	Heart	Heart - Left Ventricle
GTEX-117YX-1226-SM-5H11S	GTEX-117YX	0.258223	Male	55	Ventilator Case	Thyroid	Thyroid
GTEX-117YX-1326-SM-5H125	GTEX-117YX	0.212694	Male	55	Ventilator Case	Lung	Lung
GTEX-117YX-1426-SM-5H12H	GTEX-117YX	0.232614	Male	55	Ventilator Case	Breast	Breast - Mammary Tissue
GTEX-117YX-1526-SM-5H12T	GTEX-117YX	0.258616	Male	55	Ventilator Case	Prostate	Prostate
GTEX-117YX-1726-SM-5GZZS	GTEX-117YX	0.0884289	Male	55	Ventilator Case	Blood Vessel	Artery - Coronary
GTEX-117YX-1826-SM-5H12K	GTEX-117YX	0.176735	Male	55	Ventilator Case	Esophagus	Esophagus - Muscularis
GTEX-117YX-1926-SM-5GIEC	GTEX-117YX	0.273313	Male	55	Ventilator Case	Skin	Skin - Not Sun Exposed (Suprapubic)
GTEX-117YX-2026-SM-5GIEF	GTEX-117YX	0.463508	Male	55	Ventilator Case	Testis	Testis
GTEX-117YX-2126-SM-5GIEL	GTEX-117YX	0.388039	Male	55	Ventilator Case	Spleen	Spleen
GTEX-117YX-2226-SM-5EGJJ	GTEX-117YX	0.233812	Male	55	Ventilator Case	Adipose Tissue	Adipose - Subcutaneous
GTEX-117YX-2326-SM-5H12W	GTEX-117YX	0.282636	Male	55	Ventilator Case	Skin	Skin - Sun Exposed (Lower leg)
GTEX-117YX-2426-SM-5GZZJ	GTEX-117YX	0.179602	Male	55	Ventilator Case	Nerve	Nerve - Tibial
GTEX-117YX-2526-SM-5EQ4Q	GTEX-117YX	0.464049	Male	55	Ventilator Case	Muscle	Muscle - Skeletal
GTEX-117YX-2626-SM-5EQ53	GTEX-117YX	0.1191	Male	55	Ventilator Case	Blood Vessel	Artery - Tibial
GTEX-1192W-0005-SM-5NQBQ	GTEX-1192W	0.51015	Male	65	Fast Death of Natural Causes	Blood	Whole Blood
GTEX-1192W-0008-SM-5QGRE	GTEX-1192W	0.264916	Male	65	Fast Death of Natural Causes	Skin	Cells - Cultured fibroblasts
GTEX-1192W-0126-SM-5EGGS	GTEX-1192W	0.187946	Male	65	Fast Death of Natural Causes	Thyroid	Thyroid
GTEX-1192W-0226-SM-5EGGT	GTEX-1192W	0.0685731	Male	65	Fast Death of Natural Causes	Heart	Heart - Atrial Appendage
GTEX-1192W-2626-SM-5Q5AF	GTEX-1192W	0.350574	Male	65	Fast Death of Natural Causes	Skin	Skin - Sun Exposed (Lower leg)
GTEX-1192W-3026-SM-5GZZV	GTEX-1192W	0.329947	Male	65	Fast Death of Natural Causes	Pituitary	Pituitary
GTEX-1192X-0005-SM-5NQC3	GTEX-1192X	0.451947	Male	55	Slow Death	Blood	Whole Blood
GTEX-1192X-0008-SM-5Q5B7	GTEX-1192X	0.322623	Male	55	Slow Death	Skin	Cells - Cultured fibroblasts
GTEX-1192X-0011-R10a-SM-DO941	GTEX-1192X	0.563646	Male	55	Slow Death	Brain	Brain - Frontal Cortex (BA9)
GTEX-1192X-0011-R5a-SM-DNZZA	GTEX-1192X	0.447003	Male	55	Slow Death	Brain	Brain - Caudate (basal ganglia)
GTEX-1192X-0011-R6a-SM-DNZZB	GTEX-1192X	0.459096	Male	55	Slow Death	Brain	Brain - Nucleus accumbens (basal ganglia)
GTEX-1192X-0011-R7b-SM-DNZZC	GTEX-1192X	0.415263	Male	55	Slow Death	Brain	Brain - Putamen (basal ganglia)
GTEX-1192X-0011-R8b-SM-DO11U	GTEX-1192X	0.457779	Male	55	Slow Death	Brain	Brain - Hypothalamus
GTEX-1192X-0011-R9b-SM-DO934	GTEX-1192X	0.364588	Male	55	Slow Death	Brain	Brain - Spinal cord (cervical c-1)
GTEX-1192X-0226-SM-5H12D	GTEX-1192X	0.260294	Male	55	Slow Death	Skin	Skin - Sun Exposed (Lower leg)
GTEX-1192X-0326-SM-5H11U	GTEX-1192X	0.15403	Male	55	Slow Death	Nerve	Nerve - Tibial
GTEX-1192X-0426-SM-5GIEE	GTEX-1192X	0.412265	Male	55	Slow Death	Muscle	Muscle - Skeletal
GTEX-1192X-0726-SM-5987R	GTEX-1192X	0.108911	Male	55	Slow Death	Heart	Heart - Atrial Appendage
GTEX-1192X-1126-SM-5EGGU	GTEX-1192X	0.202376	Male	55	Slow Death	Thyroid	Thyroid
GTEX-1192X-1526-SM-5H11I	GTEX-1192X	0.130083	Male	55	Slow Death	Adipose Tissue	Adipose - Visceral (Omentum)
GTEX-1192X-1826-SM-5GIE2	GTEX-1192X	0.0816003	Male	55	Slow Death	Esophagus	Esophagus - Gastroesophageal Junction
GTEX-1192X-2326-SM-5987X	GTEX-1192X	0.199532	Male	55	Slow Death	Breast	Breast - Mammary Tissue
GTEX-1192X-2526-SM-59868	GTEX-1192X	0.0694149	Male	55	Slow Death	Small Intestine	Small Intestine - Terminal Ileum
GTEX-1192X-2726-SM-5N9DN	GTEX-1192X	0.31176	Male	55	Slow Death	Skin	Skin - Not Sun Exposed (Suprapubic)
GTEX-1192X-2926-SM-5N9BA	GTEX-1192X	0.410129	Male	55	Slow Death	Salivary Gland	Minor Salivary Gland
GTEX-1192X-3026-SM-5N9BM	GTEX-1192X	0.282274	Male	55	Slow Death	Pituitary	Pituitary
GTEX-1192X-3126-SM-5N9BY	GTEX-1192X	0.440218	Male	55	Slow Death	Brain	Brain - Cortex
GTEX-1192X-3226-SM-5987D	GTEX-1192X	0.524351	Male	55	Slow Death	Brain	Brain - Cerebellum
GTEX-11DXW-0006-SM-5NQ7Y	GTEX-11DXW	0.532407	Male	45	Fast Death of Natural Causes	Blood	Whole Blood
GTEX-11DXW-0008-SM-5Q59V	GTEX-11DXW	0.245852	Male	45	Fast Death of Natural Causes	Skin	Cells - Cultured fibroblasts
GTEX-11DXW-0011-R1a-SM-DNZZD	GTEX-11DXW	0.440655	Male	45	Fast Death of Natural Causes	Brain	Brain - Hippocampus
GTEX-11DXW-0011-R3b-SM-DNZZE	GTEX-11DXW	0.478795	Male	45	Fast Death of Natural Causes	Brain	Brain - Anterior cingulate cortex (BA24)
GTEX-11DXW-0011-R5b-SM-DO11D	GTEX-11DXW	0.393521	Male	45	Fast Death of Natural Causes	Brain	Brain - Caudate (basal ganglia)
GTEX-11DXW-0011-R6a-SM-DO11N	GTEX-11DXW	0.44858	Male	45	Fast Death of Natural Causes	Brain	Brain - Nucleus accumbens (basal ganglia)
GTEX-11DXW-0011-R7b-SM-DO119	GTEX-11DXW	0.363945	Male	45	Fast Death of Natural Causes	Brain	Brain - Putamen (basal ganglia)
GTEX-11DXW-0226-SM-5H122	GTEX-11DXW	0.254738	Male	45	Fast Death of Natural Causes	Skin	Skin - Sun Exposed (Lower leg)
GTEX-11DXW-0326-SM-5H11W	GTEX-11DXW	0.0898354	Male	45	Fast Death of Natural Causes	Adipose Tissue	Adipose - Subcutaneous
GTEX-11DXW-0426-SM-5H12E	GTEX-11DXW	0.0446384	Male	45	Fast Death of Natural Causes	Nerve	Nerve - Tibial
GTEX-11DXW-0526-SM-5H127	GTEX-11DXW	0.118723	Male	45	Fast Death of Natural Causes	Blood Vessel	Artery - Tibial
GTEX-11DXW-0626-SM-5N9ER	GTEX-11DXW	0.13151	Male	45	Fast Death of Natural Causes	Breast	Breast - Mammary Tissue
GTEX-11DXW-0726-SM-5H12J	GTEX-11DXW	0.345073	Male	45	Fast Death of Natural Causes	Muscle	Muscle - Skeletal
GTEX-11DXW-0826-SM-5H118	GTEX-11DXW	0.253652	Male	45	Fast Death of Natural Causes	Skin	Skin - Not Sun Exposed (Suprapubic)
GTEX-11DXW-1026-SM-5H11K	GTEX-11DXW	0.531738	Male	45	Fast Death of Natural Causes	Brain	Brain - Cerebellum
GTEX-11DXW-1126-SM-5H12Q	GTEX-11DXW	0.48554	Male	45	Fast Death of Natural Causes	Brain	Brain - Cortex
GTEX-11DXW-1226-SM-5H133	GTEX-11DXW	0.273019	Male	45	Fast Death of Natural Causes	Pituitary	Pituitary
GTEX-11DXX-0005-SM-5NQ8B	GTEX-11DXX	0.495691	Female	65	Ventilator Case	Blood	Whole Blood
GTEX-11DXX-0008-SM-5Q5B8	GTEX-11DXX	0.331778	Female	65	Ventilator Case	Skin	Cells - Cultured fibroblasts
GTEX-11DXX-0126-SM-5EGH7	GTEX-11DXX	0.283928	Female	65	Ventilator Case	Adrenal Gland	Adrenal Gland
GTEX-11DXX-0226-SM-5P9HL	GTEX-11DXX	0.247637	Female	65	Ventilator Case	Thyroid	Thyroid
GTEX-11DXX-0326-SM-5PNWC	GTEX-11DXX	0.30145	Female	65	Ventilator Case	Heart	Heart - Left Ventricle
GTEX-11DXX-0426-SM-5EQ5F	GTEX-11DXX	0.129046	Female	65	Ventilator Case	Blood Vessel	Artery - Aorta
GTEX-11DXX-0526-SM-5PNVR	GTEX-11DXX	0.232833	Female	65	Ventilator Case	Heart	Heart - Atrial Appendage
GTEX-11DXX-0626-SM-5Q5AG	GTEX-11DXX	0.202228	Female	65	Ventilator Case	Lung	Lung
GTEX-11DXX-0726-SM-5H12X	GTEX-11DXX	0.445593	Female	65	Ventilator Case	Spleen	Spleen
GTEX-11DXX-0826-SM-5GZZP	GTEX-11DXX	0.173789	Female	65	Ventilator Case	Blood Vessel	Artery - Coronary
GTEX-11DXX-0926-SM-5H112	GTEX-11DXX	0.410044	Female	65	Ventilator Case	Pancreas	Pancreas
GTEX-11DXX-1026-SM-5H11E	GTEX-11DXX	0.237122	Female	65	Ventilator Case	Esophagus	Esophagus - Muscularis
GTEX-11DXX-1126-SM-5GZZK	GTEX-11DXX	0.558458	Female	65	Ventilator Case	Esophagus	Esophagus - Mucosa
GTEX-11DXX-1226-SM-5GICD	GTEX-11DXX	0.196608	Female	65	Ventilator Case	Esophagus	Esophagus - Gastroesophageal Junction
GTEX-11DXX-1326-SM-5GIDZ	GTEX-11DXX	0.416139	Female	65	Ventilator Case	Stomach	Stomach
GTEX-11DXX-1426-SM-5GIDU	GTEX-11DXX	0.217201	Female	65	Ventilator Case	Ovary	Ovary
GTEX-11DXX-1526-SM-5H115	GTEX-11DXX	0.203549	Female	65	Ventilator Case	Uterus	Uterus
GTEX-11DXX-1626-SM-5H11H	GTEX-11DXX	0.372564	Female	65	Ventilator Case	Small Intestine	Small Intestine - Terminal Ileum
GTEX-11DXX-1726-SM-5H11T	GTEX-11DXX	0.298524	Female	65	Ventilator Case	Vagina	Vagina
GTEX-11DXX-1826-SM-5H126	GTEX-11DXX	0.409841	Female	65	Ventilator Case	Colon	Colon - Transverse
GTEX-11DXX-1926-SM-5EGJK	GTEX-11DXX	0.202003	Female	65	Ventilator Case	Colon	Colon - Sigmoid
GTEX-11DXX-2026-SM-5EGJL	GTEX-11DXX	0.245949	Female	65	Ventilator Case	Adipose Tissue	Adipose - Visceral (Omentum)
GTEX-11DXX-2126-SM-5PNYR	GTEX-11DXX	0.45656	Female	65	Ventilator Case	Skin	Skin - Not Sun Exposed (Suprapubic)
GTEX-11DXX-2326-SM-9YFKS	GTEX-11DXX	0.264007	Female	65	Ventilator Case	Adipose Tissue	Adipose - Subcutaneous
GTEX-11DXX-2426-SM-5GZZW	GTEX-11DXX	0.299593	Female	65	Ventilator Case	Skin	Skin - Sun Exposed (Lower leg)
GTEX-11DXX-2526-SM-5H119	GTEX-11DXX	0.250421	Female	65	Ventilator Case	Nerve	Nerve - Tibial
GTEX-11DXX-2626-SM-5Q5A3	GTEX-11DXX	0.165855	Female	65	Ventilator Case	Blood Vessel	Artery - Tibial
GTEX-11DXX-2726-SM-5PNXO	GTEX-11DXX	0.411705	Female	65	Ventilator Case	Muscle	Muscle - Skeletal
GTEX-11DXY-0006-SM-5NQ8N	GTEX-11DXY	0.507446	Male	65	Fast Death of Natural Causes	Blood	Whole Blood
GTEX-11DXY-0008-SM-5QGR4	GTEX-11DXY	0.273491	Male	65	Fast Death of Natural Causes	Skin	Cells - Cultured fibroblasts
GTEX-11DXY-0011-R10b-SM-DO12C	GTEX-11DXY	0.552156	Male	65	Fast Death of Natural Causes	Brain	Brain - Frontal Cortex (BA9)
GTEX-11DXY-0011-R11a-SM-DNZZN	GTEX-11DXY	0.577083	Male	65	Fast Death of Natural Causes	Brain	Brain - Cerebellar Hemisphere
GTEX-11DXY-0011-R5b-SM-DNZZL	GTEX-11DXY	0.456596	Male	65	Fast Death of Natural Causes	Brain	Brain - Caudate (basal ganglia)
GTEX-11DXY-0011-R6a-SM-DNZZF	GTEX-11DXY	0.49561	Male	65	Fast Death of Natural Causes	Brain	Brain - Nucleus accumbens (basal ganglia)
GTEX-11DXY-0011-R7a-SM-DO11L	GTEX-11DXY	0.450696	Male	65	Fast Death of Natural Causes	Brain	Brain - Putamen (basal ganglia)
GTEX-11DXY-0011-R8a-SM-DO11M	GTEX-11DXY	0.470828	Male	65	Fast Death of Natural Causes	Brain	Brain - Hypothalamus
GTEX-11DXY-0126-SM-5H11Q	GTEX-11DXY	0.339711	Male	65	Fast Death of Natural Causes	Skin	Skin - Not Sun Exposed (Suprapubic)
GTEX-11DXY-0226-SM-5H123	GTEX-11DXY	0.424554	Male	65	Fast Death of Natural Causes	Testis	Testis
GTEX-11DXY-0326-SM-5H12F	GTEX-11DXY	0.10569	Male	65	Fast Death of Natural Causes	Adipose Tissue	Adipose - Visceral (Omentum)
GTEX-11DXY-0426-SM-5H12R	GTEX-11DXY	0.148825	Male	65	Fast Death of Natural Causes	Thyroid	Thyroid
GTEX-11DXY-0526-SM-5EGGQ	GTEX-11DXY	0.421316	Male	65	Fast Death of Natural Causes	Liver	Liver
GTEX-11DXY-0826-SM-5EGGR	GTEX-11DXY	0.142146	Male	65	Fast Death of Natural Causes	Heart	Heart - Left Ventricle
GTEX-11DXY-1026-SM-5987V	GTEX-11DXY	0.108694	Male	65	Fast Death of Natural Causes	Heart	Heart - Atrial Appendage
GTEX-11DXY-1126-SM-5987W	GTEX-11DXY	0.140944	Male	65	Fast Death of Natural Causes	Blood Vessel	Artery - Coronary
GTEX-11DXY-1326-SM-5987Z	GTEX-11DXY	0.0586267	Male	65	Fast Death of Natural Causes	Esophagus	Esophagus - Gastroesophageal Junction
GTEX-11DXY-1426-SM-5N9CN	GTEX-11DXY	0.361354	Male	65	Fast Death of Natural Causes	Esophagus	Esophagus - Mucosa
GTEX-11DXY-1526-SM-5H129	GTEX-11DXY	0.100208	Male	65	Fast Death of Natural Causes	Esophagus	Esophagus - Muscularis
GTEX-11DXY-1626-SM-5H12L	GTEX-11DXY	0.205974	Male	65	Fast Death of Natural Causes	Adrenal Gland	Adrenal Gland
GTEX-11DXY-2026-SM-5N9CZ	GTEX-11DXY	0.110909	Male	65	Fast Death of Natural Causes	Colon	Colon - Sigmoid
GTEX-11DXY-2326-SM-5GICW	GTEX-11DXY	0.14176	Male	65	Fast Death of Natural Causes	Breast	Breast - Mammary Tissue
GTEX-11DXY-2626-SM-5GIE7	GTEX-11DXY	0.284634	Male	65	Fast Death of Natural Causes	Skin	Skin - Sun Exposed (Lower leg)
GTEX-11DXY-2726-SM-5GID2	GTEX-11DXY	0.374887	Male	65	Fast Death of Natural Causes	Muscle	Muscle - Skeletal
GTEX-11DXY-3026-SM-5N9CB	GTEX-11DXY	0.343316	Male	65	Fast Death of Natural Causes	Pituitary	Pituitary
GTEX-11DXY-3126-SM-5N9BT	GTEX-11DXY	0.532465	Male	65	Fast Death of Natural Causes	Brain	Brain - Cerebellum
GTEX-11DXY-3226-SM-5GIDE	GTEX-11DXY	0.482632	Male	65	Fast Death of Natural Causes	Brain	Brain - Cortex
GTEX-11DXZ-0006-SM-5LZZH	GTEX-11DXZ	0.547559	Male	55	Ventilator Case	Blood	Whole Blood
GTEX-11DXZ-0126-SM-5EGGY	GTEX-11DXZ	0.378585	Male	55	Ventilator Case	Liver	Liver
GTEX-11DXZ-0226-SM-5EGGZ	GTEX-11DXZ	0.311958	Male	55	Ventilator Case	Adrenal Gland	Adrenal Gland
GTEX-11DXZ-0326-SM-5EGH1	GTEX-11DXZ	0.166164	Male	55	Ventilator Case	Heart	Heart - Atrial Appendage
GTEX-11DXZ-0426-SM-5987Y	GTEX-11DXZ	0.0835883	Male	55	Ventilator Case	Blood Vessel	Artery - Aorta
GTEX-11DXZ-0526-SM-5GU7J	GTEX-11DXZ	0.108979	Male	55	Ventilator Case	Blood Vessel	Artery - Coronary
GTEX-11DXZ-0626-SM-5GU77	GTEX-11DXZ	0.26324	Male	55	Ventilator Case	Heart	Heart - Left Ventricle
GTEX-11DXZ-0726-SM-5N9C4	GTEX-11DXZ	0.257862	Male	55	Ventilator Case	Lung	Lung
GTEX-11DXZ-0926-SM-5N9CG	GTEX-11DXZ	0.209879	Male	55	Ventilator Case	Thyroid	Thyroid
GTEX-11DXZ-1026-SM-5N9D5	GTEX-11DXZ	0.146714	Male	55	Ventilator Case	Esophagus	Esophagus - Gastroesophageal Junction
GTEX-11DXZ-1226-SM-5H11L	GTEX-11DXZ	0.410197	Male	55	Ventilator Case	Esophagus	Esophagus - Mucosa
GTEX-11DXZ-1326-SM-5H11X	GTEX-11DXZ	0.349076	Male	55	Ventilator Case	Small Intestine	Small Intestine - Terminal Ileum
GTEX-11DXZ-1426-SM-5H12A	GTEX-11DXZ	0.0830505	Male	55	Ventilator Case	Adipose Tissue	Adipose - Visceral (Omentum)
GTEX-11DXZ-1626-SM-5GIDI	GTEX-11DXZ	0.168138	Male	55	Ventilator Case	Colon	Colon - Sigmoid
GTEX-11DXZ-1726-SM-5H12M	GTEX-11DXZ	0.3988	Male	55	Ventilator Case	Colon	Colon - Transverse
GTEX-11DXZ-1826-SM-5H12Y	GTEX-11DXZ	0.12754	Male	55	Ventilator Case	Prostate	Prostate
GTEX-11DXZ-1926-SM-5GZZL	GTEX-11DXZ	0.138628	Male	55	Ventilator Case	Breast	Breast - Mammary Tissue
GTEX-11DXZ-2026-SM-5987S	GTEX-11DXZ	0.320254	Male	55	Ventilator Case	Skin	Skin - Not Sun Exposed (Suprapubic)
GTEX-11DXZ-2126-SM-59881	GTEX-11DXZ	0.555802	Male	55	Ventilator Case	Testis	Testis
GTEX-11DXZ-2326-SM-5EGGV	GTEX-11DXZ	0.369853	Male	55	Ventilator Case	Skin	Skin - Sun Exposed (Lower leg)
GTEX-11DXZ-2426-SM-5N9DT	GTEX-11DXZ	0.411522	Male	55	Ventilator Case	Muscle	Muscle - Skeletal
GTEX-11DXZ-2526-SM-5N9BG	GTEX-11DXZ	0.109828	Male	55	Ventilator Case	Nerve	Nerve - Tibial
GTEX-11DXZ-2626-SM-59882	GTEX-11DXZ	0.0943379	Male	55	Ventilator Case	Blood Vessel	Artery - Tibial
GTEX-11DYG-0006-SM-5NQB2	GTEX-11DYG	0.499068	Male	65	Fast Death of Natural Causes	Blood	Whole Blood
GTEX-11DYG-0008-SM-5QGR5	GTEX-11DYG	0.186812	Male	65	Fast Death of Natural Causes	Skin	Cells - Cultured fibroblasts
GTEX-11DYG-0011-R10b-SM-DNZZO	GTEX-11DYG	0.520724	Male	65	Fast Death of Natural Causes	Brain	Brain - Frontal Cortex (BA9)
GTEX-11DYG-0011-R11a-SM-DNZZP	GTEX-11DYG	0.575661	Male	65	Fast Death of Natural Causes	Brain	Brain - Cerebellar Hemisphere
GTEX-11DYG-0011-R5a-SM-DO928	GTEX-11DYG	0.553125	Male	65	Fast Death of Natural Causes	Brain	Brain - Caudate (basal ganglia)
GTEX-11DYG-0011-R6a-SM-DO936	GTEX-11DYG	0.434329	Male	65	Fast Death of Natural Causes	Brain	Brain - Nucleus accumbens (basal ganglia)
GTEX-11DYG-0011-R7b-SM-EXUS6	GTEX-11DYG	0.467124	Male	65	Fast Death of Natural Causes	Brain	Brain - Putamen (basal ganglia)
GTEX-11DYG-0011-R8a-SM-DO93F	GTEX-11DYG	0.480512	Male	65	Fast Death of Natural Causes	Brain	Brain - Hypothalamus
GTEX-11DYG-0126-SM-59883	GTEX-11DYG	0.372011	Male	65	Fast Death of Natural Causes	Skin	Skin - Sun Exposed (Lower leg)
GTEX-11DYG-0426-SM-5987J	GTEX-11DYG	0.102884	Male	65	Fast Death of Natural Causes	Nerve	Nerve - Tibial
GTEX-11DYG-0826-SM-5N9GH	GTEX-11DYG	0.18901	Male	65	Fast Death of Natural Causes	Thyroid	Thyroid
GTEX-11DYG-0926-SM-5EGGW	GTEX-11DYG	0.0627447	Male	65	Fast Death of Natural Causes	Blood Vessel	Artery - Coronary
GTEX-11DYG-1026-SM-5A5JQ	GTEX-11DYG	0.166048	Male	65	Fast Death of Natural Causes	Heart	Heart - Atrial Appendage
GTEX-11DYG-1226-SM-5N9DC	GTEX-11DYG	0.036939	Male	65	Fast Death of Natural Causes	Blood Vessel	Artery - Aorta
GTEX-11DYG-1326-SM-5N9DO	GTEX-11DYG	0.354067	Male	65	Fast Death of Natural Causes	Esophagus	Esophagus - Mucosa
GTEX-11DYG-1426-SM-5A5JR	GTEX-11DYG	0.117764	Male	65	Fast Death of Natural Causes	Esophagus	Esophagus - Muscularis
GTEX-11DYG-1526-SM-5A5JS	GTEX-11DYG	0.317657	Male	65	Fast Death of Natural Causes	Skin	Skin - Not Sun Exposed (Suprapubic)
GTEX-11DYG-1926-SM-5H12I	GTEX-11DYG	0.101214	Male	65	Fast Death of Natural Causes	Esophagus	Esophagus - Gastroesophageal Junction
GTEX-11DYG-2026-SM-5EGGX	GTEX-11DYG	0.0888674	Male	65	Fast Death of Natural Causes	Adipose Tissue	Adipose - Visceral (Omentum)
GTEX-11DYG-2526-SM-5N9BB	GTEX-11DYG	0.189251	Male	65	Fast Death of Natural Causes	Prostate	Prostate
GTEX-11DYG-2926-SM-5H132	GTEX-11DYG	0.544298	Male	65	Fast Death of Natural Causes	Brain	Brain - Cerebellum
GTEX-11DYG-3126-SM-5A5L6	GTEX-11DYG	0.334563	Male	65	Fast Death of Natural Causes	Pituitary	Pituitary
GTEX-11DZ1-0008-SM-5QGR3	GTEX-11DZ1	0.26476	Male	55	Slow Death	Skin	Cells - Cultured fibroblasts
GTEX-11DZ1-0011-R10b-SM-DO943	GTEX-11DZ1	0.486035	Male	55	Slow Death	Brain	Brain - Frontal Cortex (BA9)
GTEX-11DZ1-0011-R11b-SM-DO11W	GTEX-11DZ1	0.563805	Male	55	Slow Death	Brain	Brain - Cerebellar Hemisphere
GTEX-11DZ1-0011-R2a-SM-DNZZM	GTEX-11DZ1	0.479937	Male	55	Slow Death	Brain	Brain - Substantia nigra
GTEX-11DZ1-0011-R3a-SM-DNZYY	GTEX-11DZ1	0.531216	Male	55	Slow Death	Brain	Brain - Anterior cingulate cortex (BA24)
GTEX-11DZ1-0011-R5a-SM-DO11J	GTEX-11DZ1	0.408291	Male	55	Slow Death	Brain	Brain - Caudate (basal ganglia)
GTEX-11DZ1-0011-R6b-SM-DNZZG	GTEX-11DZ1	0.470525	Male	55	Slow Death	Brain	Brain - Nucleus accumbens (basal ganglia)
GTEX-11DZ1-0011-R7a-SM-DNZZH	GTEX-11DZ1	0.468967	Male	55	Slow Death	Brain	Brain - Putamen (basal ganglia)
GTEX-11DZ1-0011-R8b-SM-DNZZI	GTEX-11DZ1	0.478922	Male	55	Slow Death	Brain	Brain - Hypothalamus
GTEX-11DZ1-0011-R9a-SM-DO933	GTEX-11DZ1	0.372143	Male	55	Slow Death	Brain	Brain - Spinal cord (cervical c-1)
GTEX-11DZ1-0126-SM-5985Q	GTEX-11DZ1	0.26834	Male	55	Slow Death	Skin	Skin - Sun Exposed (Lower leg)
GTEX-11DZ1-0226-SM-5A5KF	GTEX-11DZ1	0.233764	Male	55	Slow Death	Adipose Tissue	Adipose - Subcutaneous
GTEX-11DZ1-0326-SM-5N9BN	GTEX-11DZ1	0.319816	Male	55	Slow Death	Breast	Breast - Mammary Tissue
GTEX-11DZ1-0426-SM-5H11A	GTEX-11DZ1	0.0293421	Male	55	Slow Death	Lung	Lung
GTEX-11DZ1-0926-SM-5EQ5R	GTEX-11DZ1	0.425456	Male	55	Slow Death	Muscle	Muscle - Skeletal
GTEX-11DZ1-2026-SM-5A5KG	GTEX-11DZ1	0.434088	Male	55	Slow Death	Esophagus	Esophagus - Mucosa
GTEX-11DZ1-2426-SM-5GZZX	GTEX-11DZ1	0.323426	Male	55	Slow Death	Skin	Skin - Not Sun Exposed (Suprapubic)
GTEX-11DZ1-2726-SM-5A5KH	GTEX-11DZ1	0.229849	Male	55	Slow Death	Thyroid	Thyroid
GTEX-11DZ1-2926-SM-5A5KI	GTEX-11DZ1	0.478988	Male	55	Slow Death	Brain	Brain - Cerebellum
GTEX-11EI6-0005-SM-5N9GN	GTEX-11EI6	0.516906	Male	65	Slow Death	Blood	Whole Blood
GTEX-11EI6-0008-SM-5QGR7	GTEX-11EI6	0.200406	Male	65	Slow Death	Skin	Cells - Cultured fibroblasts
GTEX-11EI6-0011-R10a-SM-DO93R	GTEX-11EI6	0.47231	Male	65	Slow Death	Brain	Brain - Frontal Cortex (BA9)
GTEX-11EI6-0011-R11a-SM-DO11V	GTEX-11EI6	0.555609	Male	65	Slow Death	Brain	Brain - Cerebellar Hemisphere
GTEX-11EI6-0011-R1a-SM-DO93L	GTEX-11EI6	0.402823	Male	65	Slow Death	Brain	Brain - Hippocampus
GTEX-11EI6-0011-R8a-SM-DO93M	GTEX-11EI6	0.429365	Male	65	Slow Death	Brain	Brain - Hypothalamus
GTEX-11EI6-0126-SM-5985R	GTEX-11EI6	0.316165	Male	65	Slow Death	Skin	Skin - Sun Exposed (Lower leg)
GTEX-11EI6-0226-SM-5EQ64	GTEX-11EI6	0.111032	Male	65	Slow Death	Adipose Tissue	Adipose - Subcutaneous
GTEX-11EI6-0326-SM-5EQ6G	GTEX-11EI6	0.416924	Male	65	Slow Death	Muscle	Muscle - Skeletal
GTEX-11EI6-0426-SM-5EQ43	GTEX-11EI6	0.132193	Male	65	Slow Death	Nerve	Nerve - Tibial
GTEX-11EI6-0526-SM-5985S	GTEX-11EI6	0.174091	Male	65	Slow Death	Blood Vessel	Artery - Tibial
GTEX-11EI6-0626-SM-5985T	GTEX-11EI6	0.104624	Male	65	Slow Death	Breast	Breast - Mammary Tissue
GTEX-11EI6-0726-SM-59866	GTEX-11EI6	0.151911	Male	65	Slow Death	Thyroid	Thyroid
GTEX-11EI6-0826-SM-5985V	GTEX-11EI6	0.0574804	Male	65	Slow Death	Lung	Lung
GTEX-11EI6-1526-SM-5P9GL	GTEX-11EI6	0.246334	Male	65	Slow Death	Esophagus	Esophagus - Mucosa
GTEX-11EI6-2226-SM-5EGJM	GTEX-11EI6	0.526628	Male	65	Slow Death	Testis	Testis
GTEX-11EI6-2426-SM-5PNVS	GTEX-11EI6	0.064441	Male	65	Slow Death	Stomach	Stomach
GTEX-11EI6-2626-SM-5PNVT	GTEX-11EI6	0.0952215	Male	65	Slow Death	Colon	Colon - Sigmoid
GTEX-11EI6-2826-SM-5H11D	GTEX-11EI6	0.190136	Male	65	Slow Death	Skin	Skin - Not Sun Exposed (Suprapubic)
GTEX-11EI6-2926-SM-5985U	GTEX-11EI6	0.469407	Male	65	Slow Death	Brain	Brain - Cerebellum
GTEX-11EI6-3026-SM-5GZZO	GTEX-11EI6	0.42993	Male	65	Slow Death	Brain	Brain - Cortex
GTEX-11EI6-3126-SM-5H111	GTEX-11EI6	0.139561	Male	65	Slow Death	Pituitary	Pituitary
GTEX-11EM3-0001-SM-5Q5BD	GTEX-11EM3	0.875106	Female	25	Ventilator Case	Blood	Cells - EBV-transformed lymphocytes
GTEX-11EM3-0005-SM-5N9DK	GTEX-11EM3	0.487038	Female	25	Ventilator Case	Blood	Whole Blood
GTEX-11EM3-0126-SM-5985K	GTEX-11EM3	0.190502	Female	25	Ventilator Case	Thyroid	Thyroid
GTEX-11EM3-0226-SM-5985Y	GTEX-11EM3	0.12247	Female	25	Ventilator Case	Blood Vessel	Artery - Aorta
GTEX-11EM3-0326-SM-5A5KJ	GTEX-11EM3	0.297638	Female	25	Ventilator Case	Adrenal Gland	Adrenal Gland
GTEX-11EM3-0426-SM-5N9BZ	GTEX-11EM3	0.2194	Female	25	Ventilator Case	Heart	Heart - Atrial Appendage
GTEX-11EM3-0526-SM-5H12N	GTEX-11EM3	0.148955	Female	25	Ventilator Case	Blood Vessel	Artery - Coronary
GTEX-11EM3-0626-SM-5H12Z	GTEX-11EM3	0.333635	Female	25	Ventilator Case	Heart	Heart - Left Ventricle
GTEX-11EM3-0726-SM-5GZZM	GTEX-11EM3	0.20532	Female	25	Ventilator Case	Esophagus	Esophagus - Muscularis
GTEX-11EM3-0826-SM-5N9CC	GTEX-11EM3	0.468282	Female	25	Ventilator Case	Esophagus	Esophagus - Mucosa
GTEX-11EM3-0926-SM-5A5KK	GTEX-11EM3	0.150282	Female	25	Ventilator Case	Esophagus	Esophagus - Gastroesophageal Junction
GTEX-11EM3-1026-SM-5A5KL	GTEX-11EM3	0.34116	Female	25	Ventilator Case	Stomach	Stomach
GTEX-11EM3-1126-SM-5A5KM	GTEX-11EM3	0.23719	Female	25	Ventilator Case	Adipose Tissue	Adipose - Visceral (Omentum)
GTEX-11EM3-1226-SM-5N9DD	GTEX-11EM3	0.243462	Female	25	Ventilator Case	Skin	Skin - Not Sun Exposed (Suprapubic)
GTEX-11EM3-1326-SM-5N9C6	GTEX-11EM3	0.238253	Female	25	Ventilator Case	Breast	Breast - Mammary Tissue
GTEX-11EM3-1526-SM-5A5KN	GTEX-11EM3	0.408036	Female	25	Ventilator Case	Colon	Colon - Transverse
GTEX-11EM3-1626-SM-5N9CO	GTEX-11EM3	0.225516	Female	25	Ventilator Case	Colon	Colon - Sigmoid
GTEX-11EM3-1726-SM-5N9D1	GTEX-11EM3	0.161999	Female	25	Ventilator Case	Ovary	Ovary
GTEX-11EM3-1826-SM-5A5KO	GTEX-11EM3	0.0978985	Female	25	Ventilator Case	Vagina	Vagina
GTEX-11EM3-1926-SM-5987U	GTEX-11EM3	0.10416	Female	25	Ventilator Case	Uterus	Uterus
GTEX-11EM3-2126-SM-5H11M	GTEX-11EM3	0.412911	Female	25	Ventilator Case	Muscle	Muscle - Skeletal
GTEX-11EM3-2226-SM-5H11Y	GTEX-11EM3	0.174287	Female	25	Ventilator Case	Blood Vessel	Artery - Tibial
GTEX-11EM3-2326-SM-5H12B	GTEX-11EM3	0.225148	Female	25	Ventilator Case	Adipose Tissue	Adipose - Subcutaneous
GTEX-11EM3-2426-SM-59861	GTEX-11EM3	0.284526	Female	25	Ventilator Case	Skin	Skin - Sun Exposed (Lower leg)
GTEX-11EMC-0002-SM-5Q5DO	GTEX-11EMC	0.932208	Female	65	Fast Death of Natural Causes	Blood	Cells - EBV-transformed lymphocytes
GTEX-11EMC-0006-SM-5O9DN	GTEX-11EMC	0.488838	Female	65	Fast Death of Natural Causes	Blood	Whole Blood
GTEX-11EMC-0008-SM-5Q5DR	GTEX-11EMC	0.340028	Female	65	Fast Death of Natural Causes	Skin	Cells - Cultured fibroblasts
GTEX-11EMC-0011-R10a-SM-DNZZJ	GTEX-11EMC	0.506044	Female	65	Fast Death of Natural Causes	Brain	Brain - Frontal Cortex (BA9)
GTEX-11EMC-0011-R11b-SM-DNZZK	GTEX-11EMC	0.580022	Female	65	Fast Death of Natural Causes	Brain	Brain - Cerebellar Hemisphere
GTEX-11EMC-0011-R2b-SM-DO114	GTEX-11EMC	0.348071	Female	65	Fast Death of Natural Causes	Brain	Brain - Substantia nigra
GTEX-11EMC-0011-R8b-SM-DO91Z	GTEX-11EMC	0.344253	Female	65	Fast Death of Natural Causes	Brain	Brain - Hypothalamus
GTEX-11EMC-0011-R9b-SM-DO921	GTEX-11EMC	0.364869	Female	65	Fast Death of Natural Causes	Brain	Brain - Spinal cord (cervical c-1)
GTEX-11EMC-0126-SM-5EGKV	GTEX-11EMC	0.157608	Female	65	Fast Death of Natural Causes	Lung	Lung
GTEX-11EMC-0226-SM-5EGLP	GTEX-11EMC	0.14477	Female	65	Fast Death of Natural Causes	Thyroid	Thyroid
GTEX-11EMC-0526-SM-5EGJN	GTEX-11EMC	0.250867	Female	65	Fast Death of Natural Causes	Adrenal Gland	Adrenal Gland
GTEX-11EMC-0726-SM-5EGJO	GTEX-11EMC	0.183606	Female	65	Fast Death of Natural Causes	Heart	Heart - Left Ventricle
GTEX-11EMC-0826-SM-59862	GTEX-11EMC	0.119766	Female	65	Fast Death of Natural Causes	Heart	Heart - Atrial Appendage
GTEX-11EMC-0926-SM-59863	GTEX-11EMC	0.0632041	Female	65	Fast Death of Natural Causes	Blood Vessel	Artery - Aorta
GTEX-11EMC-1426-SM-5N9E4	GTEX-11EMC	0.132649	Female	65	Fast Death of Natural Causes	Colon	Colon - Sigmoid
GTEX-11EMC-1726-SM-5H11P	GTEX-11EMC	0.185203	Female	65	Fast Death of Natural Causes	Ovary	Ovary
GTEX-11EMC-1826-SM-5A5JT	GTEX-11EMC	0.145454	Female	65	Fast Death of Natural Causes	Uterus	Uterus
GTEX-11EMC-1926-SM-5A5JU	GTEX-11EMC	0.340216	Female	65	Fast Death of Natural Causes	Vagina	Vagina
GTEX-11EMC-2026-SM-5A5JV	GTEX-11EMC	0.206577	Female	65	Fast Death of Natural Causes	Breast	Breast - Mammary Tissue
GTEX-11EMC-2226-SM-5A5JW	GTEX-11EMC	0.493169	Female	65	Fast Death of Natural Causes	Esophagus	Esophagus - Mucosa
GTEX-11EMC-2526-SM-5PNVU	GTEX-11EMC	0.3977	Female	65	Fast Death of Natural Causes	Salivary Gland	Minor Salivary Gland
GTEX-11EMC-2626-SM-59864	GTEX-11EMC	0.411671	Female	65	Fast Death of Natural Causes	Muscle	Muscle - Skeletal
GTEX-11EMC-2826-SM-5PNY6	GTEX-11EMC	0.237119	Female	65	Fast Death of Natural Causes	Adipose Tissue	Adipose - Subcutaneous
GTEX-11EMC-2926-SM-5EQ4F	GTEX-11EMC	0.246829	Female	65	Fast Death of Natural Causes	Skin	Skin - Sun Exposed (Lower leg)
GTEX-11EMC-3026-SM-5EQ4R	GTEX-11EMC	0.110202	Female	65	Fast Death of Natural Causes	Blood Vessel	Artery - Tibial
GTEX-11EMC-3126-SM-5EGJP	GTEX-11EMC	0.223831	Female	65	Fast Death of Natural Causes	Pituitary	Pituitary
GTEX-11EMC-3226-SM-5EGKW	GTEX-11EMC	0.418076	Female	65	Fast Death of Natural Causes	Brain	Brain - Cortex
GTEX-11EMC-3326-SM-5P9JH	GTEX-11EMC	0.513408	Female	65	Fast Death of Natural Causes	Brain	Brain - Cerebellum
GTEX-11EQ8-0006-SM-5P9HJ	GTEX-11EQ8	0.567144	Male	65	Slow Death	Blood	Whole Blood
GTEX-11EQ8-0008-SM-5Q5DJ	GTEX-11EQ8	0.198056	Male	65	Slow Death	Skin	Cells - Cultured fibroblasts
GTEX-11EQ8-0226-SM-5EQ5G	GTEX-11EQ8	0.185927	Male	65	Slow Death	Adipose Tissue	Adipose - Subcutaneous
GTEX-11EQ8-0426-SM-5N9DP	GTEX-11EQ8	0.126618	Male	65	Slow Death	Blood Vessel	Artery - Tibial
GTEX-11EQ8-0526-SM-5N9BC	GTEX-11EQ8	0.379901	Male	65	Slow Death	Muscle	Muscle - Skeletal
GTEX-11EQ8-0826-SM-5N9FG	GTEX-11EQ8	0.245921	Male	65	Slow Death	Thyroid	Thyroid
GTEX-11EQ8-0926-SM-5H12V	GTEX-11EQ8	0.347989	Male	65	Slow Death	Skin	Skin - Not Sun Exposed (Suprapubic)
GTEX-11EQ8-1326-SM-5EGJQ	GTEX-11EQ8	0.140437	Male	65	Slow Death	Heart	Heart - Atrial Appendage
GTEX-11EQ8-1426-SM-5EGJR	GTEX-11EQ8	0.521753	Male	65	Slow Death	Testis	Testis
GTEX-11EQ8-2626-SM-5N9BO	GTEX-11EQ8	0.172589	Male	65	Slow Death	Colon	Colon - Sigmoid
GTEX-11EQ9-0002-SM-5QGQ1	GTEX-11EQ9	0.858718	Male	35	Fast Death of Natural Causes	Blood	Cells - EBV-transformed lymphocytes
GTEX-11EQ9-0006-SM-5LUB6	GTEX-11EQ9	0.505554	Male	35	Fast Death of Natural Causes	Blood	Whole Blood
GTEX-11EQ9-0008-SM-5Q5DK	GTEX-11EQ9	0.268205	Male	35	Fast Death of Natural Causes	Skin	Cells - Cultured fibroblasts
GTEX-11EQ9-0126-SM-5986I	GTEX-11EQ9	0.289795	Male	35	Fast Death of Natural Causes	Adrenal Gland	Adrenal Gland
GTEX-11EQ9-0226-SM-5A5JX	GTEX-11EQ9	0.269023	Male	35	Fast Death of Natural Causes	Lung	Lung
GTEX-11EQ9-0426-SM-5A5JY	GTEX-11EQ9	0.359274	Male	35	Fast Death of Natural Causes	Spleen	Spleen
GTEX-11EQ9-0526-SM-5A5JZ	GTEX-11EQ9	0.398159	Male	35	Fast Death of Natural Causes	Liver	Liver
GTEX-11EQ9-0626-SM-5A5K1	GTEX-11EQ9	0.223094	Male	35	Fast Death of Natural Causes	Thyroid	Thyroid
GTEX-11EQ9-0726-SM-5A5K2	GTEX-11EQ9	0.437806	Male	35	Fast Death of Natural Causes	Esophagus	Esophagus - Mucosa
GTEX-11EQ9-0826-SM-5986Y	GTEX-11EQ9	0.174459	Male	35	Fast Death of Natural Causes	Esophagus	Esophagus - Muscularis
GTEX-11EQ9-0926-SM-5HL6I	GTEX-11EQ9	0.17463	Male	35	Fast Death of Natural Causes	Esophagus	Esophagus - Gastroesophageal Junction
GTEX-11EQ9-1026-SM-5H134	GTEX-11EQ9	0.400969	Male	35	Fast Death of Natural Causes	Pancreas	Pancreas
GTEX-11EQ9-1126-SM-5987I	GTEX-11EQ9	0.268456	Male	35	Fast Death of Natural Causes	Adipose Tissue	Adipose - Visceral (Omentum)
GTEX-11EQ9-1226-SM-5987E	GTEX-11EQ9	0.181693	Male	35	Fast Death of Natural Causes	Stomach	Stomach
GTEX-11EQ9-1326-SM-5985X	GTEX-11EQ9	0.375035	Male	35	Fast Death of Natural Causes	Small Intestine	Small Intestine - Terminal Ileum
GTEX-11EQ9-1426-SM-5987G	GTEX-11EQ9	0.179635	Male	35	Fast Death of Natural Causes	Colon	Colon - Transverse
GTEX-11EQ9-1526-SM-5PNY7	GTEX-11EQ9	0.180395	Male	35	Fast Death of Natural Causes	Colon	Colon - Sigmoid
GTEX-11EQ9-1626-SM-5PNY8	GTEX-11EQ9	0.308982	Male	35	Fast Death of Natural Causes	Skin	Skin - Not Sun Exposed (Suprapubic)
GTEX-11EQ9-1726-SM-5HL6U	GTEX-11EQ9	0.191044	Male	35	Fast Death of Natural Causes	Prostate	Prostate
GTEX-11EQ9-1826-SM-5Q5AJ	GTEX-11EQ9	0.209343	Male	35	Fast Death of Natural Causes	Breast	Breast - Mammary Tissue
GTEX-11EQ9-1926-SM-5PNVV	GTEX-11EQ9	0.571497	Male	35	Fast Death of Natural Causes	Testis	Testis
GTEX-11EQ9-2026-SM-5P9JI	GTEX-11EQ9	0.296615	Male	35	Fast Death of Natural Causes	Salivary Gland	Minor Salivary Gland
GTEX-11EQ9-2126-SM-5PNVW	GTEX-11EQ9	0.439034	Male	35	Fast Death of Natural Causes	Muscle	Muscle - Skeletal
GTEX-11EQ9-2226-SM-5987H	GTEX-11EQ9	0.159371	Male	35	Fast Death of Natural Causes	Blood Vessel	Artery - Tibial
GTEX-11EQ9-2326-SM-5HL5H	GTEX-11EQ9	0.160317	Male	35	Fast Death of Natural Causes	Nerve	Nerve - Tibial
GTEX-11EQ9-2426-SM-5HL5T	GTEX-11EQ9	0.355516	Male	35	Fast Death of Natural Causes	Skin	Skin - Sun Exposed (Lower leg)
GTEX-11EQ9-2526-SM-5HL66	GTEX-11EQ9	0.18342	Male	35	Fast Death of Natural Causes	Adipose Tissue	Adipose - Subcutaneous
GTEX-11GS4-0006-SM-5SI9M	GTEX-11GS4	0.522746	Male	65	Fast Death of Natural Causes	Blood	Whole Blood
GTEX-11GS4-0008-SM-5QGRA	GTEX-11GS4	0.205279	Male	65	Fast Death of Natural Causes	Skin	Cells - Cultured fibroblasts
GTEX-11GS4-0011-R1a-SM-DO129	GTEX-11GS4	0.461937	Male	65	Fast Death of Natural Causes	Brain	Brain - Hippocampus
GTEX-11GS4-0011-R2a-SM-DO942	GTEX-11GS4	0.434076	Male	65	Fast Death of Natural Causes	Brain	Brain - Substantia nigra
GTEX-11GS4-0226-SM-5HL77	GTEX-11GS4	0.341741	Male	65	Fast Death of Natural Causes	Skin	Skin - Not Sun Exposed (Suprapubic)
GTEX-11GS4-0326-SM-5N9F7	GTEX-11GS4	0.0304796	Male	65	Fast Death of Natural Causes	Blood Vessel	Artery - Aorta
GTEX-11GS4-0426-SM-5N9CD	GTEX-11GS4	0.0644243	Male	65	Fast Death of Natural Causes	Heart	Heart - Atrial Appendage
GTEX-11GS4-0526-SM-5A5KQ	GTEX-11GS4	0.112109	Male	65	Fast Death of Natural Causes	Heart	Heart - Left Ventricle
GTEX-11GS4-0626-SM-5A5LC	GTEX-11GS4	0.0495256	Male	65	Fast Death of Natural Causes	Blood Vessel	Artery - Coronary
GTEX-11GS4-0826-SM-5986J	GTEX-11GS4	0.17666	Male	65	Fast Death of Natural Causes	Thyroid	Thyroid
GTEX-11GS4-1026-SM-5N9DE	GTEX-11GS4	0.105167	Male	65	Fast Death of Natural Causes	Adipose Tissue	Adipose - Visceral (Omentum)
GTEX-11GS4-1426-SM-5N9D2	GTEX-11GS4	0.0776544	Male	65	Fast Death of Natural Causes	Esophagus	Esophagus - Muscularis
GTEX-11GS4-1826-SM-5HL4T	GTEX-11GS4	0.108926	Male	65	Fast Death of Natural Causes	Colon	Colon - Sigmoid
GTEX-11GS4-2026-SM-5N9CP	GTEX-11GS4	0.535564	Male	65	Fast Death of Natural Causes	Testis	Testis
GTEX-11GS4-2126-SM-5A5KR	GTEX-11GS4	0.133571	Male	65	Fast Death of Natural Causes	Breast	Breast - Mammary Tissue
GTEX-11GS4-2326-SM-5A5KS	GTEX-11GS4	0.195982	Male	65	Fast Death of Natural Causes	Kidney	Kidney - Cortex
GTEX-11GS4-2526-SM-5A5KT	GTEX-11GS4	0.386412	Male	65	Fast Death of Natural Causes	Muscle	Muscle - Skeletal
GTEX-11GS4-2626-SM-5A5LD	GTEX-11GS4	0.0886471	Male	65	Fast Death of Natural Causes	Adipose Tissue	Adipose - Subcutaneous
GTEX-11GS4-2726-SM-5A5LE	GTEX-11GS4	0.251345	Male	65	Fast Death of Natural Causes	Skin	Skin - Sun Exposed (Lower leg)
GTEX-11GS4-2826-SM-5HL56	GTEX-11GS4	0.106979	Male	65	Fast Death of Natural Causes	Nerve	Nerve - Tibial
GTEX-11GS4-2926-SM-5A5LF	GTEX-11GS4	0.0682052	Male	65	Fast Death of Natural Causes	Blood Vessel	Artery - Tibial
GTEX-11GS4-3026-SM-5A5LG	GTEX-11GS4	0.337185	Male	65	Fast Death of Natural Causes	Pituitary	Pituitary
GTEX-11GS4-3126-SM-5A5LH	GTEX-11GS4	0.467388	Male	65	Fast Death of Natural Causes	Brain	Brain - Cortex
GTEX-11GSO-0005-SM-5O9CA	GTEX-11GSO	0.516514	Male	65	Fast Death of Natural Causes	Blood	Whole Blood
GTEX-11GSO-0011-R1b-SM-57WD3	GTEX-11GSO	0.349438	Male	65	Fast Death of Natural Causes	Brain	Brain - Hippocampus
GTEX-11GSO-0011-R2a-SM-57WDF	GTEX-11GSO	0.393467	Male	65	Fast Death of Natural Causes	Brain	Brain - Substantia nigra
GTEX-11GSO-0011-R3b-SM-57WB2	GTEX-11GSO	0.524616	Male	65	Fast Death of Natural Causes	Brain	Brain - Anterior cingulate cortex (BA24)
GTEX-11GSO-0226-SM-5A5LV	GTEX-11GSO	0.149491	Male	65	Fast Death of Natural Causes	Adipose Tissue	Adipose - Visceral (Omentum)
GTEX-11GSO-0626-SM-5A5LW	GTEX-11GSO	0.27634	Male	65	Fast Death of Natural Causes	Thyroid	Thyroid
GTEX-11GSO-1926-SM-5A5K3	GTEX-11GSO	0.170836	Male	65	Fast Death of Natural Causes	Breast	Breast - Mammary Tissue
GTEX-11GSO-2326-SM-5A5LX	GTEX-11GSO	0.186047	Male	65	Fast Death of Natural Causes	Adipose Tissue	Adipose - Subcutaneous
GTEX-11GSO-2426-SM-5A5LY	GTEX-11GSO	0.273757	Male	65	Fast Death of Natural Causes	Skin	Skin - Sun Exposed (Lower leg)
GTEX-11GSO-2526-SM-5PNVX	GTEX-11GSO	0.413025	Male	65	Fast Death of Natural Causes	Muscle	Muscle - Skeletal
GTEX-11GSO-2626-SM-5Q5AK	GTEX-11GSO	0.121443	Male	65	Fast Death of Natural Causes	Nerve	Nerve - Tibial
GTEX-11GSO-2826-SM-5HL6Q	GTEX-11GSO	0.193586	Male	65	Fast Death of Natural Causes	Pituitary	Pituitary
GTEX-11GSO-2926-SM-5HL73	GTEX-11GSO	0.482399	Male	65	Fast Death of Natural Causes	Brain	Brain - Cortex
GTEX-11GSO-3026-SM-5Q5AL	GTEX-11GSO	0.539315	Male	65	Fast Death of Natural Causes	Brain	Brain - Cerebellum
GTEX-11GSP-0006-SM-5N9EL	GTEX-11GSP	0.493777	Female	65	Fast Death of Natural Causes	Blood	Whole Blood
GTEX-11GSP-0008-SM-5Q5DM	GTEX-11GSP	0.347589	Female	65	Fast Death of Natural Causes	Skin	Cells - Cultured fibroblasts
GTEX-11GSP-0011-R10a-SM-5NQ7J	GTEX-11GSP	0.391771	Female	65	Fast Death of Natural Causes	Brain	Brain - Frontal Cortex (BA9)
GTEX-11GSP-0011-R11b-SM-5NQ7V	GTEX-11GSP	0.56362	Female	65	Fast Death of Natural Causes	Brain	Brain - Cerebellar Hemisphere
GTEX-11GSP-0011-R1a-SM-9QEJ3	GTEX-11GSP	0.43049	Female	65	Fast Death of Natural Causes	Brain	Brain - Hippocampus
GTEX-11GSP-0011-R2b-SM-9QEGE	GTEX-11GSP	0.421307	Female	65	Fast Death of Natural Causes	Brain	Brain - Substantia nigra
GTEX-11GSP-0011-R3a-SM-9QEGF	GTEX-11GSP	0.38089	Female	65	Fast Death of Natural Causes	Brain	Brain - Anterior cingulate cortex (BA24)
GTEX-11GSP-0011-R5a-SM-57WBE	GTEX-11GSP	0.401744	Female	65	Fast Death of Natural Causes	Brain	Brain - Caudate (basal ganglia)
GTEX-11GSP-0011-R6b-SM-57WBQ	GTEX-11GSP	0.386048	Female	65	Fast Death of Natural Causes	Brain	Brain - Nucleus accumbens (basal ganglia)
GTEX-11GSP-0011-R7b-SM-57WC3	GTEX-11GSP	0.42955	Female	65	Fast Death of Natural Causes	Brain	Brain - Putamen (basal ganglia)
GTEX-11GSP-0011-R8b-SM-5NQ79	GTEX-11GSP	0.303587	Female	65	Fast Death of Natural Causes	Brain	Brain - Hypothalamus
GTEX-11GSP-0011-R9b-SM-5NQ77	GTEX-11GSP	0.365316	Female	65	Fast Death of Natural Causes	Brain	Brain - Spinal cord (cervical c-1)
GTEX-11GSP-0126-SM-5A5KU	GTEX-11GSP	0.0709639	Female	65	Fast Death of Natural Causes	Thyroid	Thyroid
GTEX-11GSP-0226-SM-5A5KV	GTEX-11GSP	0.148188	Female	65	Fast Death of Natural Causes	Ovary	Ovary
GTEX-11GSP-0326-SM-5A5KW	GTEX-11GSP	0.274397	Female	65	Fast Death of Natural Causes	Adrenal Gland	Adrenal Gland
GTEX-11GSP-0426-SM-5A5KX	GTEX-11GSP	0.38188	Female	65	Fast Death of Natural Causes	Pancreas	Pancreas
GTEX-11GSP-0626-SM-5986T	GTEX-11GSP	0.298382	Female	65	Fast Death of Natural Causes	Liver	Liver
GTEX-11GSP-0726-SM-5986L	GTEX-11GSP	0.0996055	Female	65	Fast Death of Natural Causes	Lung	Lung
GTEX-11GSP-0926-SM-9WYSG	GTEX-11GSP	0.111324	Female	65	Fast Death of Natural Causes	Breast	Breast - Mammary Tissue
GTEX-11GSP-1026-SM-9WYSH	GTEX-11GSP	0.0674589	Female	65	Fast Death of Natural Causes	Adipose Tissue	Adipose - Visceral (Omentum)
GTEX-11GSP-1126-SM-5A5LM	GTEX-11GSP	0.0556328	Female	65	Fast Death of Natural Causes	Blood Vessel	Artery - Aorta
GTEX-11GSP-1226-SM-5985M	GTEX-11GSP	0.0855372	Female	65	Fast Death of Natural Causes	Heart	Heart - Atrial Appendage
GTEX-11GSP-1326-SM-5A5KY	GTEX-11GSP	0.126426	Female	65	Fast Death of Natural Causes	Heart	Heart - Left Ventricle
GTEX-11GSP-1626-SM-5986N	GTEX-11GSP	0.0739024	Female	65	Fast Death of Natural Causes	Colon	Colon - Transverse
GTEX-11GSP-1726-SM-5A5LI	GTEX-11GSP	0.0456514	Female	65	Fast Death of Natural Causes	Esophagus	Esophagus - Muscularis
GTEX-11GSP-1826-SM-5N9DQ	GTEX-11GSP	0.391312	Female	65	Fast Death of Natural Causes	Esophagus	Esophagus - Mucosa
GTEX-11GSP-2126-SM-5HL5E	GTEX-11GSP	0.306929	Female	65	Fast Death of Natural Causes	Stomach	Stomach
GTEX-11GSP-2226-SM-5HL5Q	GTEX-11GSP	0.0260754	Female	65	Fast Death of Natural Causes	Vagina	Vagina
GTEX-11GSP-2326-SM-5HL63	GTEX-11GSP	0.316315	Female	65	Fast Death of Natural Causes	Skin	Skin - Not Sun Exposed (Suprapubic)
GTEX-11GSP-2426-SM-5N9BD	GTEX-11GSP	0.0714207	Female	65	Fast Death of Natural Causes	Uterus	Uterus
GTEX-11GSP-2526-SM-5N9BP	GTEX-11GSP	0.199982	Female	65	Fast Death of Natural Causes	Skin	Skin - Sun Exposed (Lower leg)
GTEX-11GSP-2726-SM-5A5LJ	GTEX-11GSP	0.337961	Female	65	Fast Death of Natural Causes	Muscle	Muscle - Skeletal
GTEX-11GSP-2826-SM-5A5LK	GTEX-11GSP	0.0567047	Female	65	Fast Death of Natural Causes	Nerve	Nerve - Tibial
GTEX-11GSP-2926-SM-5N9C2	GTEX-11GSP	0.0770492	Female	65	Fast Death of Natural Causes	Blood Vessel	Artery - Tibial
GTEX-11GSP-3026-SM-5N9CE	GTEX-11GSP	0.164437	Female	65	Fast Death of Natural Causes	Pituitary	Pituitary
GTEX-11GSP-3126-SM-5A5LL	GTEX-11GSP	0.527535	Female	65	Fast Death of Natural Causes	Brain	Brain - Cerebellum
GTEX-11GSP-3226-SM-5986O	GTEX-11GSP	0.368113	Female	65	Fast Death of Natural Causes	Brain	Brain - Cortex
GTEX-11H98-0008-SM-5QGR8	GTEX-11H98	0.197931	Male	55	Fast Death of Natural Causes	Skin	Cells - Cultured fibroblasts
GTEX-11H98-0011-R10b-SM-5NQ98	GTEX-11H98	0.49617	Male	55	Fast Death of Natural Causes	Brain	Brain - Frontal Cortex (BA9)
GTEX-11H98-0011-R11b-SM-5NQ6U	GTEX-11H98	0.580047	Male	55	Fast Death of Natural Causes	Brain	Brain - Cerebellar Hemisphere
GTEX-11H98-0011-R5b-SM-57WCF	GTEX-11H98	0.427688	Male	55	Fast Death of Natural Causes	Brain	Brain - Caudate (basal ganglia)
GTEX-11H98-0011-R8a-SM-5NQ8V	GTEX-11H98	0.378883	Male	55	Fast Death of Natural Causes	Brain	Brain - Hypothalamus
GTEX-11H98-0126-SM-5EGHG	GTEX-11H98	0.291174	Male	55	Fast Death of Natural Causes	Skin	Skin - Sun Exposed (Lower leg)
GTEX-11H98-0226-SM-5NQ89	GTEX-11H98	0.190889	Male	55	Fast Death of Natural Causes	Adipose Tissue	Adipose - Subcutaneous
GTEX-11H98-0326-SM-5HL4S	GTEX-11H98	0.388046	Male	55	Fast Death of Natural Causes	Muscle	Muscle - Skeletal
GTEX-11H98-0426-SM-5HL55	GTEX-11H98	0.124734	Male	55	Fast Death of Natural Causes	Nerve	Nerve - Tibial
GTEX-11I78-0001-SM-5Q5BE	GTEX-11I78	0.843169	Female	55	Ventilator Case	Blood	Cells - EBV-transformed lymphocytes
GTEX-11I78-0005-SM-5N9GB	GTEX-11I78	0.523312	Female	55	Ventilator Case	Blood	Whole Blood
GTEX-11I78-0008-SM-5Q5DI	GTEX-11I78	0.293432	Female	55	Ventilator Case	Skin	Cells - Cultured fibroblasts
GTEX-11I78-0126-SM-5HL6F	GTEX-11I78	0.269136	Female	55	Ventilator Case	Lung	Lung
GTEX-11I78-0226-SM-5HL6R	GTEX-11I78	0.277042	Female	55	Ventilator Case	Adipose Tissue	Adipose - Visceral (Omentum)
GTEX-11I78-0526-SM-5986A	GTEX-11I78	0.209496	Female	55	Ventilator Case	Thyroid	Thyroid
GTEX-11I78-0626-SM-5A5LZ	GTEX-11I78	0.352883	Female	55	Ventilator Case	Pancreas	Pancreas
GTEX-11I78-0726-SM-5A5M1	GTEX-11I78	0.120463	Female	55	Ventilator Case	Blood Vessel	Artery - Aorta
GTEX-11I78-0826-SM-5A5K4	GTEX-11I78	0.249657	Female	55	Ventilator Case	Heart	Heart - Left Ventricle
GTEX-11I78-1026-SM-5HL74	GTEX-11I78	0.169708	Female	55	Ventilator Case	Blood Vessel	Artery - Coronary
GTEX-11I78-1126-SM-5A5K5	GTEX-11I78	0.38732	Female	55	Ventilator Case	Small Intestine	Small Intestine - Terminal Ileum
GTEX-11I78-1226-SM-5A5K6	GTEX-11I78	0.439017	Female	55	Ventilator Case	Colon	Colon - Transverse
GTEX-11I78-1326-SM-5PNY9	GTEX-11I78	0.243714	Female	55	Ventilator Case	Colon	Colon - Sigmoid
GTEX-11I78-1426-SM-5PNVY	GTEX-11I78	0.175913	Female	55	Ventilator Case	Esophagus	Esophagus - Muscularis
GTEX-11I78-1526-SM-5A5K7	GTEX-11I78	0.504109	Female	55	Ventilator Case	Esophagus	Esophagus - Mucosa
GTEX-11I78-1726-SM-5A5M3	GTEX-11I78	0.422385	Female	55	Ventilator Case	Stomach	Stomach
GTEX-11I78-1826-SM-5A5M4	GTEX-11I78	0.258234	Female	55	Ventilator Case	Adrenal Gland	Adrenal Gland
GTEX-11I78-1926-SM-59878	GTEX-11I78	0.168397	Female	55	Ventilator Case	Ovary	Ovary
GTEX-11I78-2026-SM-5987C	GTEX-11I78	0.41238	Female	55	Ventilator Case	Vagina	Vagina
GTEX-11I78-2126-SM-5A5K8	GTEX-11I78	0.195313	Female	55	Ventilator Case	Uterus	Uterus
GTEX-11I78-2226-SM-5PNYA	GTEX-11I78	0.195711	Female	55	Ventilator Case	Breast	Breast - Mammary Tissue
GTEX-11I78-2326-SM-5Q5AH	GTEX-11I78	0.139892	Female	55	Ventilator Case	Blood Vessel	Artery - Tibial
GTEX-11I78-2426-SM-5A5K9	GTEX-11I78	0.430266	Female	55	Ventilator Case	Muscle	Muscle - Skeletal
GTEX-11I78-2626-SM-5Q5AI	GTEX-11I78	0.211829	Female	55	Ventilator Case	Adipose Tissue	Adipose - Subcutaneous
GTEX-11LCK-0005-SM-5O98U	GTEX-11LCK	0.507734	Male	35	Ventilator Case	Blood	Whole Blood
GTEX-11LCK-0008-SM-5Q5BB	GTEX-11LCK	0.212895	Male	35	Ventilator Case	Skin	Cells - Cultured fibroblasts
GTEX-11LCK-0126-SM-5A5M5	GTEX-11LCK	0.356312	Male	35	Ventilator Case	Spleen	Spleen
GTEX-11LCK-0226-SM-5A5M6	GTEX-11LCK	0.406959	Male	35	Ventilator Case	Pancreas	Pancreas
GTEX-11LCK-0326-SM-5A5M7	GTEX-11LCK	0.162755	Male	35	Ventilator Case	Adipose Tissue	Adipose - Visceral (Omentum)
GTEX-11LCK-0426-SM-5A5M8	GTEX-11LCK	0.25986	Male	35	Ventilator Case	Lung	Lung
GTEX-11LCK-0526-SM-5A5M9	GTEX-11LCK	0.191068	Male	35	Ventilator Case	Thyroid	Thyroid
GTEX-11LCK-0726-SM-5PNYC	GTEX-11LCK	0.125576	Male	35	Ventilator Case	Blood Vessel	Artery - Aorta
GTEX-11LCK-0826-SM-5PNYD	GTEX-11LCK	0.200484	Male	35	Ventilator Case	Heart	Heart - Atrial Appendage
GTEX-11LCK-0926-SM-5A5KA	GTEX-11LCK	0.267376	Male	35	Ventilator Case	Heart	Heart - Left Ventricle
GTEX-11LCK-1026-SM-5A5KB	GTEX-11LCK	0.310631	Male	35	Ventilator Case	Skin	Skin - Sun Exposed (Lower leg)
GTEX-11LCK-1126-SM-5A5KC	GTEX-11LCK	0.183586	Male	35	Ventilator Case	Adipose Tissue	Adipose - Subcutaneous
GTEX-11LCK-1226-SM-5Q5AM	GTEX-11LCK	0.376821	Male	35	Ventilator Case	Muscle	Muscle - Skeletal
GTEX-11LCK-1326-SM-5Q5AN	GTEX-11LCK	0.18365	Male	35	Ventilator Case	Nerve	Nerve - Tibial
GTEX-11LCK-1426-SM-5HL5R	GTEX-11LCK	0.140471	Male	35	Ventilator Case	Blood Vessel	Artery - Tibial
GTEX-11LCK-1526-SM-5HL64	GTEX-11LCK	0.144399	Male	35	Ventilator Case	Esophagus	Esophagus - Gastroesophageal Junction
GTEX-11LCK-1626-SM-5PNYB	GTEX-11LCK	0.159572	Male	35	Ventilator Case	Esophagus	Esophagus - Muscularis
GTEX-11LCK-1726-SM-5S2OQ	GTEX-11LCK	0.5461	Male	35	Ventilator Case	Esophagus	Esophagus - Mucosa
GTEX-11LCK-1926-SM-5A5KE	GTEX-11LCK	0.153814	Male	35	Ventilator Case	Small Intestine	Small Intestine - Terminal Ileum
GTEX-11LCK-2026-SM-5A5MA	GTEX-11LCK	0.391925	Male	35	Ventilator Case	Colon	Colon - Transverse
GTEX-11LCK-2226-SM-5HL4Q	GTEX-11LCK	0.300938	Male	35	Ventilator Case	Skin	Skin - Not Sun Exposed (Suprapubic)
GTEX-11LCK-2326-SM-5HL53	GTEX-11LCK	0.573475	Male	35	Ventilator Case	Testis	Testis
GTEX-11LCK-2426-SM-5HL5F	GTEX-11LCK	0.158674	Male	35	Ventilator Case	Breast	Breast - Mammary Tissue
GTEX-11NSD-0008-SM-5Q5BC	GTEX-11NSD	0.321212	Male	25	Ventilator Case	Skin	Cells - Cultured fibroblasts
GTEX-11NSD-0126-SM-5987F	GTEX-11NSD	0.232577	Male	25	Ventilator Case	Thyroid	Thyroid
GTEX-11NSD-0226-SM-5A5LR	GTEX-11NSD	0.295917	Male	25	Ventilator Case	Adrenal Gland	Adrenal Gland
GTEX-11NSD-0326-SM-5A5LS	GTEX-11NSD	0.191923	Male	25	Ventilator Case	Lung	Lung
GTEX-11NSD-0426-SM-5N9CR	GTEX-11NSD	0.401703	Male	25	Ventilator Case	Spleen	Spleen
GTEX-11NSD-0526-SM-5A5LT	GTEX-11NSD	0.409375	Male	25	Ventilator Case	Pancreas	Pancreas
GTEX-11NSD-0626-SM-5A5LU	GTEX-11NSD	0.269146	Male	25	Ventilator Case	Skin	Skin - Not Sun Exposed (Suprapubic)
GTEX-11NSD-0826-SM-5986S	GTEX-11NSD	0.148944	Male	25	Ventilator Case	Prostate	Prostate
GTEX-11NSD-0926-SM-5N9DR	GTEX-11NSD	0.166221	Male	25	Ventilator Case	Breast	Breast - Mammary Tissue
GTEX-11NSD-1026-SM-5N9BE	GTEX-11NSD	0.555364	Male	25	Ventilator Case	Testis	Testis
GTEX-11NSD-1126-SM-5N9BQ	GTEX-11NSD	0.491134	Male	25	Ventilator Case	Esophagus	Esophagus - Mucosa
GTEX-11NSD-1226-SM-5986Q	GTEX-11NSD	0.131359	Male	25	Ventilator Case	Esophagus	Esophagus - Muscularis
GTEX-11NSD-1426-SM-5HL67	GTEX-11NSD	0.411058	Male	25	Ventilator Case	Stomach	Stomach
GTEX-11NSD-1626-SM-5986U	GTEX-11NSD	0.251093	Male	25	Ventilator Case	Colon	Colon - Transverse
GTEX-11NSD-1726-SM-5N9C3	GTEX-11NSD	0.403746	Male	25	Ventilator Case	Small Intestine	Small Intestine - Terminal Ileum
GTEX-11NSD-1826-SM-5N9CF	GTEX-11NSD	0.173163	Male	25	Ventilator Case	Nerve	Nerve - Tibial
GTEX-11NSD-2026-SM-5HL5U	GTEX-11NSD	0.445293	Male	25	Ventilator Case	Muscle	Muscle - Skeletal
GTEX-11NSD-2226-SM-5986V	GTEX-11NSD	0.296396	Male	25	Ventilator Case	Skin	Skin - Sun Exposed (Lower leg)
GTEX-11NUK-0005-SM-5MR5F	GTEX-11NUK	0.520297	Male	55	Fast Death of Natural Causes	Blood	Whole Blood
GTEX-11NUK-0008-SM-5Q5B9	GTEX-11NUK	0.313484	Male	55	Fast Death of Natural Causes	Skin	Cells - Cultured fibroblasts
GTEX-11NUK-0011-R4a-SM-DO12B	GTEX-11NUK	0.453297	Male	55	Fast Death of Natural Causes	Brain	Brain - Amygdala
GTEX-11NUK-0011-R5a-SM-DO93N	GTEX-11NUK	0.426169	Male	55	Fast Death of Natural Causes	Brain	Brain - Caudate (basal ganglia)
GTEX-11NUK-0011-R6a-SM-DO93O	GTEX-11NUK	0.466894	Male	55	Fast Death of Natural Causes	Brain	Brain - Nucleus accumbens (basal ganglia)
GTEX-11NUK-0011-R7a-SM-DO93P	GTEX-11NUK	0.444673	Male	55	Fast Death of Natural Causes	Brain	Brain - Putamen (basal ganglia)
GTEX-11NUK-0126-SM-5A5L3	GTEX-11NUK	0.27426	Male	55	Fast Death of Natural Causes	Skin	Skin - Sun Exposed (Lower leg)
GTEX-11NUK-0226-SM-5A5L4	GTEX-11NUK	0.40645	Male	55	Fast Death of Natural Causes	Muscle	Muscle - Skeletal
GTEX-11NUK-0326-SM-5HL5K	GTEX-11NUK	0.0907853	Male	55	Fast Death of Natural Causes	Adipose Tissue	Adipose - Subcutaneous
GTEX-11NUK-0426-SM-5HL5V	GTEX-11NUK	0.0968425	Male	55	Fast Death of Natural Causes	Nerve	Nerve - Tibial
GTEX-11NUK-0526-SM-5A5L5	GTEX-11NUK	0.0981262	Male	55	Fast Death of Natural Causes	Blood Vessel	Artery - Tibial
GTEX-11NUK-0726-SM-5A5ME	GTEX-11NUK	0.0470717	Male	55	Fast Death of Natural Causes	Blood Vessel	Artery - Aorta
GTEX-11NUK-0826-SM-5HL4U	GTEX-11NUK	0.0819043	Male	55	Fast Death of Natural Causes	Lung	Lung
GTEX-11NUK-0926-SM-5HL57	GTEX-11NUK	0.10737	Male	55	Fast Death of Natural Causes	Heart	Heart - Atrial Appendage
GTEX-11NUK-1026-SM-5HL5J	GTEX-11NUK	0.173656	Male	55	Fast Death of Natural Causes	Thyroid	Thyroid
GTEX-11NUK-1226-SM-5P9GM	GTEX-11NUK	0.370856	Male	55	Fast Death of Natural Causes	Liver	Liver
GTEX-11NUK-1326-SM-5P9GN	GTEX-11NUK	0.407645	Male	55	Fast Death of Natural Causes	Esophagus	Esophagus - Mucosa
GTEX-11NUK-1426-SM-5HL68	GTEX-11NUK	0.0970639	Male	55	Fast Death of Natural Causes	Esophagus	Esophagus - Muscularis
GTEX-11NUK-1726-SM-5A5L2	GTEX-11NUK	0.0867451	Male	55	Fast Death of Natural Causes	Esophagus	Esophagus - Gastroesophageal Junction
GTEX-11NUK-2026-SM-5PNVZ	GTEX-11NUK	0.073317	Male	55	Fast Death of Natural Causes	Adipose Tissue	Adipose - Visceral (Omentum)
GTEX-11NUK-2426-SM-5BC4U	GTEX-11NUK	0.277414	Male	55	Fast Death of Natural Causes	Stomach	Stomach
GTEX-11NUK-2626-SM-5A5MB	GTEX-11NUK	0.562873	Male	55	Fast Death of Natural Causes	Testis	Testis
GTEX-11NUK-2726-SM-5A5MC	GTEX-11NUK	0.323211	Male	55	Fast Death of Natural Causes	Skin	Skin - Not Sun Exposed (Suprapubic)
GTEX-11NUK-2926-SM-5A5MD	GTEX-11NUK	0.493239	Male	55	Fast Death of Natural Causes	Brain	Brain - Cortex
GTEX-11NUK-3026-SM-5986K	GTEX-11NUK	0.551074	Male	55	Fast Death of Natural Causes	Brain	Brain - Cerebellum
GTEX-11NUK-3126-SM-5986M	GTEX-11NUK	0.23105	Male	55	Fast Death of Natural Causes	Pituitary	Pituitary
GTEX-11NV4-0005-SM-5N9EX	GTEX-11NV4	0.547162	Male	65	Fast Death of Natural Causes	Blood	Whole Blood
GTEX-11NV4-0008-SM-5Q5BA	GTEX-11NV4	0.263309	Male	65	Fast Death of Natural Causes	Skin	Cells - Cultured fibroblasts
GTEX-11NV4-0011-R5a-SM-5NQ88	GTEX-11NV4	0.460312	Male	65	Fast Death of Natural Causes	Brain	Brain - Caudate (basal ganglia)
GTEX-11NV4-0011-R6a-SM-57WD5	GTEX-11NV4	0.490836	Male	65	Fast Death of Natural Causes	Brain	Brain - Nucleus accumbens (basal ganglia)
GTEX-11NV4-0011-R7a-SM-57WDH	GTEX-11NV4	0.483307	Male	65	Fast Death of Natural Causes	Brain	Brain - Putamen (basal ganglia)
GTEX-11NV4-0326-SM-5HL58	GTEX-11NV4	0.370736	Male	65	Fast Death of Natural Causes	Muscle	Muscle - Skeletal
GTEX-11NV4-0526-SM-5N9BF	GTEX-11NV4	0.124097	Male	65	Fast Death of Natural Causes	Blood Vessel	Artery - Tibial
GTEX-11NV4-0626-SM-5N9BR	GTEX-11NV4	0.306319	Male	65	Fast Death of Natural Causes	Thyroid	Thyroid
GTEX-11NV4-0826-SM-5BC4S	GTEX-11NV4	0.129681	Male	65	Fast Death of Natural Causes	Heart	Heart - Atrial Appendage
GTEX-11NV4-1126-SM-5HL6J	GTEX-11NV4	0.134135	Male	65	Fast Death of Natural Causes	Lung	Lung
GTEX-11NV4-1326-SM-5HL6V	GTEX-11NV4	0.400545	Male	65	Fast Death of Natural Causes	Liver	Liver
GTEX-11NV4-1426-SM-5BC4W	GTEX-11NV4	0.0886525	Male	65	Fast Death of Natural Causes	Adipose Tissue	Adipose - Visceral (Omentum)
GTEX-11NV4-1726-SM-5N9FC	GTEX-11NV4	0.581777	Male	65	Fast Death of Natural Causes	Testis	Testis
GTEX-11NV4-1926-SM-5N9D4	GTEX-11NV4	0.285392	Male	65	Fast Death of Natural Causes	Salivary Gland	Minor Salivary Gland
GTEX-11NV4-2026-SM-5N9DG	GTEX-11NV4	0.11441	Male	65	Fast Death of Natural Causes	Breast	Breast - Mammary Tissue
GTEX-11NV4-2126-SM-5N9DS	GTEX-11NV4	0.470218	Male	65	Fast Death of Natural Causes	Brain	Brain - Cortex
GTEX-11NV4-2226-SM-5BC4T	GTEX-11NV4	0.566036	Male	65	Fast Death of Natural Causes	Brain	Brain - Cerebellum
GTEX-11NV4-2326-SM-5BC4X	GTEX-11NV4	0.319139	Male	65	Fast Death of Natural Causes	Pituitary	Pituitary
GTEX-11O72-0006-SM-5O9DB	GTEX-11O72	0.491791	Male	45	Fast Death of Natural Causes	Blood	Whole Blood
GTEX-11O72-0008-SM-5Q5DN	GTEX-11O72	0.247767	Male	45	Fast Death of Natural Causes	Skin	Cells - Cultured fibroblasts
GTEX-11O72-0011-R5a-SM-DO922	GTEX-11O72	0.329387	Male	45	Fast Death of Natural Causes	Brain	Brain - Caudate (basal ganglia)
GTEX-11O72-0011-R6a-SM-DNZZQ	GTEX-11O72	0.407289	Male	45	Fast Death of Natural Causes	Brain	Brain - Nucleus accumbens (basal ganglia)
GTEX-11O72-0126-SM-59887	GTEX-11O72	0.32959	Male	45	Fast Death of Natural Causes	Skin	Skin - Sun Exposed (Lower leg)
GTEX-11O72-0226-SM-59869	GTEX-11O72	0.194242	Male	45	Fast Death of Natural Causes	Adipose Tissue	Adipose - Subcutaneous
GTEX-11O72-0326-SM-5986D	GTEX-11O72	0.370574	Male	45	Fast Death of Natural Causes	Muscle	Muscle - Skeletal
GTEX-11O72-0426-SM-5BC5B	GTEX-11O72	0.0939751	Male	45	Fast Death of Natural Causes	Blood Vessel	Artery - Tibial
GTEX-11O72-0526-SM-5Q5AO	GTEX-11O72	0.0837332	Male	45	Fast Death of Natural Causes	Nerve	Nerve - Tibial
GTEX-11O72-0626-SM-5PNYE	GTEX-11O72	0.273403	Male	45	Fast Death of Natural Causes	Skin	Skin - Not Sun Exposed (Suprapubic)
GTEX-11O72-0726-SM-5P9GO	GTEX-11O72	0.506549	Male	45	Fast Death of Natural Causes	Testis	Testis
GTEX-11O72-1026-SM-5986B	GTEX-11O72	0.104665	Male	45	Fast Death of Natural Causes	Heart	Heart - Atrial Appendage
GTEX-11O72-1126-SM-5N9E2	GTEX-11O72	0.198507	Male	45	Fast Death of Natural Causes	Heart	Heart - Left Ventricle
GTEX-11O72-1326-SM-5BC5A	GTEX-11O72	0.0680164	Male	45	Fast Death of Natural Causes	Lung	Lung
GTEX-11O72-1926-SM-5PNW1	GTEX-11O72	0.0654976	Male	45	Fast Death of Natural Causes	Esophagus	Esophagus - Muscularis
GTEX-11O72-2026-SM-5N9G8	GTEX-11O72	0.0427065	Male	45	Fast Death of Natural Causes	Esophagus	Esophagus - Gastroesophageal Junction
GTEX-11O72-2126-SM-5N9FO	GTEX-11O72	0.16494	Male	45	Fast Death of Natural Causes	Breast	Breast - Mammary Tissue
GTEX-11O72-2226-SM-5PNW2	GTEX-11O72	0.0560791	Male	45	Fast Death of Natural Causes	Colon	Colon - Transverse
GTEX-11O72-2326-SM-5BC7H	GTEX-11O72	0.149333	Male	45	Fast Death of Natural Causes	Thyroid	Thyroid
GTEX-11O72-2726-SM-5HL6K	GTEX-11O72	0.132513	Male	45	Fast Death of Natural Causes	Prostate	Prostate
GTEX-11O72-2826-SM-5HL6W	GTEX-11O72	0.524794	Male	45	Fast Death of Natural Causes	Brain	Brain - Cerebellum
GTEX-11O72-2926-SM-5BC4V	GTEX-11O72	0.427185	Male	45	Fast Death of Natural Causes	Brain	Brain - Cortex
GTEX-11O72-3026-SM-5986R	GTEX-11O72	0.226947	Male	45	Fast Death of Natural Causes	Pituitary	Pituitary
GTEX-11OC5-0004-SM-5S2O6	GTEX-11OC5	0.895399	Male	65	Fast Death of Natural Causes	Blood	Cells - EBV-transformed lymphocytes
GTEX-11OC5-0006-SM-5N9FA	GTEX-11OC5	0.521347	Male	65	Fast Death of Natural Causes	Blood	Whole Blood
GTEX-11OC5-0008-SM-5S2OH	GTEX-11OC5	0.272564	Male	65	Fast Death of Natural Causes	Skin	Cells - Cultured fibroblasts
GTEX-11OC5-0126-SM-5HL6A	GTEX-11OC5	0.292942	Male	65	Fast Death of Natural Causes	Skin	Skin - Sun Exposed (Lower leg)
GTEX-11OC5-0326-SM-5PNW5	GTEX-11OC5	0.406281	Male	65	Fast Death of Natural Causes	Muscle	Muscle - Skeletal
GTEX-11OC5-0426-SM-5Q5AR	GTEX-11OC5	0.15582	Male	65	Fast Death of Natural Causes	Blood Vessel	Artery - Tibial
GTEX-11OC5-0526-SM-5N9EE	GTEX-11OC5	0.139335	Male	65	Fast Death of Natural Causes	Nerve	Nerve - Tibial
GTEX-11OC5-0626-SM-5HL6M	GTEX-11OC5	0.47433	Male	65	Fast Death of Natural Causes	Brain	Brain - Cerebellum
GTEX-11OC5-0726-SM-5P9JK	GTEX-11OC5	0.443844	Male	65	Fast Death of Natural Causes	Brain	Brain - Cortex
GTEX-11OF3-0006-SM-5O9CM	GTEX-11OF3	0.554172	Male	65	Fast Death of Natural Causes	Blood	Whole Blood
GTEX-11OF3-0008-SM-5S2NH	GTEX-11OF3	0.325504	Male	65	Fast Death of Natural Causes	Skin	Cells - Cultured fibroblasts
GTEX-11OF3-0011-R11a-SM-57WCR	GTEX-11OF3	0.604438	Male	65	Fast Death of Natural Causes	Brain	Brain - Cerebellar Hemisphere
GTEX-11OF3-0011-R5a-SM-57WB4	GTEX-11OF3	0.460305	Male	65	Fast Death of Natural Causes	Brain	Brain - Caudate (basal ganglia)
GTEX-11OF3-0011-R6b-SM-57WBG	GTEX-11OF3	0.494893	Male	65	Fast Death of Natural Causes	Brain	Brain - Nucleus accumbens (basal ganglia)
GTEX-11OF3-0011-R7a-SM-57WCG	GTEX-11OF3	0.461522	Male	65	Fast Death of Natural Causes	Brain	Brain - Putamen (basal ganglia)
GTEX-11OF3-0011-R8b-SM-57WCS	GTEX-11OF3	0.454173	Male	65	Fast Death of Natural Causes	Brain	Brain - Hypothalamus
GTEX-11OF3-0126-SM-5PNYF	GTEX-11OF3	0.34867	Male	65	Fast Death of Natural Causes	Skin	Skin - Not Sun Exposed (Suprapubic)
GTEX-11OF3-0626-SM-5BC4Y	GTEX-11OF3	0.174282	Male	65	Fast Death of Natural Causes	Thyroid	Thyroid
GTEX-11OF3-0726-SM-5BC4Z	GTEX-11OF3	0.366366	Male	65	Fast Death of Natural Causes	Liver	Liver
GTEX-11OF3-0826-SM-5BC51	GTEX-11OF3	0.0877804	Male	65	Fast Death of Natural Causes	Adipose Tissue	Adipose - Visceral (Omentum)
GTEX-11OF3-1126-SM-5986C	GTEX-11OF3	0.13467	Male	65	Fast Death of Natural Causes	Lung	Lung
GTEX-11OF3-1326-SM-5N9FJ	GTEX-11OF3	0.296267	Male	65	Fast Death of Natural Causes	Kidney	Kidney - Cortex
GTEX-11OF3-1726-SM-5GU5Q	GTEX-11OF3	0.0946623	Male	65	Fast Death of Natural Causes	Prostate	Prostate
GTEX-11OF3-1826-SM-5987N	GTEX-11OF3	0.539261	Male	65	Fast Death of Natural Causes	Testis	Testis
GTEX-11OF3-1926-SM-59889	GTEX-11OF3	0.0927695	Male	65	Fast Death of Natural Causes	Breast	Breast - Mammary Tissue
GTEX-11OF3-2226-SM-5986F	GTEX-11OF3	0.070634	Male	65	Fast Death of Natural Causes	Esophagus	Esophagus - Muscularis
GTEX-11OF3-2326-SM-5GU73	GTEX-11OF3	0.0915132	Male	65	Fast Death of Natural Causes	Esophagus	Esophagus - Gastroesophageal Junction
GTEX-11OF3-2426-SM-5Q5AS	GTEX-11OF3	0.13518	Male	65	Fast Death of Natural Causes	Adipose Tissue	Adipose - Subcutaneous
GTEX-11OF3-2526-SM-5P9JL	GTEX-11OF3	0.41558	Male	65	Fast Death of Natural Causes	Muscle	Muscle - Skeletal
GTEX-11OF3-2626-SM-5GU7F	GTEX-11OF3	0.332438	Male	65	Fast Death of Natural Causes	Skin	Skin - Sun Exposed (Lower leg)
GTEX-11OF3-2926-SM-5HL78	GTEX-11OF3	0.562887	Male	65	Fast Death of Natural Causes	Brain	Brain - Cortex
GTEX-11OF3-3026-SM-5GU52	GTEX-11OF3	0.182918	Male	65	Fast Death of Natural Causes	Pituitary	Pituitary
GTEX-11ONC-0005-SM-5O9CY	GTEX-11ONC	0.563434	Male	65	Fast Death of Natural Causes	Blood	Whole Blood
GTEX-11ONC-0008-SM-5S2MG	GTEX-11ONC	0.210947	Male	65	Fast Death of Natural Causes	Skin	Cells - Cultured fibroblasts
GTEX-11ONC-0011-R1a-SM-57WD4	GTEX-11ONC	0.388029	Male	65	Fast Death of Natural Causes	Brain	Brain - Hippocampus
GTEX-11ONC-0011-R4b-SM-DO93H	GTEX-11ONC	0.404344	Male	65	Fast Death of Natural Causes	Brain	Brain - Amygdala
GTEX-11ONC-0011-R5b-SM-DO93I	GTEX-11ONC	0.419196	Male	65	Fast Death of Natural Causes	Brain	Brain - Caudate (basal ganglia)
GTEX-11ONC-0011-R6a-SM-DO12A	GTEX-11ONC	0.424166	Male	65	Fast Death of Natural Causes	Brain	Brain - Nucleus accumbens (basal ganglia)
GTEX-11ONC-0011-R7b-SM-DO93J	GTEX-11ONC	0.451427	Male	65	Fast Death of Natural Causes	Brain	Brain - Putamen (basal ganglia)
GTEX-11ONC-0011-R8b-SM-5NQ87	GTEX-11ONC	0.406078	Male	65	Fast Death of Natural Causes	Brain	Brain - Hypothalamus
GTEX-11ONC-0011-R9b-SM-5NQ8J	GTEX-11ONC	0.360849	Male	65	Fast Death of Natural Causes	Brain	Brain - Spinal cord (cervical c-1)
GTEX-11ONC-0126-SM-5PNW6	GTEX-11ONC	0.14963	Male	65	Fast Death of Natural Causes	Heart	Heart - Left Ventricle
GTEX-11ONC-0526-SM-5BC57	GTEX-11ONC	0.389953	Male	65	Fast Death of Natural Causes	Pancreas	Pancreas
GTEX-11ONC-0926-SM-5BC5E	GTEX-11ONC	0.0637735	Male	65	Fast Death of Natural Causes	Blood Vessel	Artery - Aorta
GTEX-11ONC-1026-SM-5GU64	GTEX-11ONC	0.110299	Male	65	Fast Death of Natural Causes	Heart	Heart - Atrial Appendage
GTEX-11ONC-1126-SM-5GU6G	GTEX-11ONC	0.0334224	Male	65	Fast Death of Natural Causes	Blood Vessel	Artery - Coronary
GTEX-11ONC-1426-SM-5N9F4	GTEX-11ONC	0.0647468	Male	65	Fast Death of Natural Causes	Esophagus	Esophagus - Muscularis
GTEX-11ONC-1526-SM-5GU6S	GTEX-11ONC	0.38693	Male	65	Fast Death of Natural Causes	Esophagus	Esophagus - Mucosa
GTEX-11ONC-1926-SM-5GU75	GTEX-11ONC	0.160831	Male	65	Fast Death of Natural Causes	Colon	Colon - Sigmoid
GTEX-11ONC-2026-SM-5HL61	GTEX-11ONC	0.0654525	Male	65	Fast Death of Natural Causes	Colon	Colon - Transverse
GTEX-11ONC-2126-SM-5HL6E	GTEX-11ONC	0.147174	Male	65	Fast Death of Natural Causes	Breast	Breast - Mammary Tissue
GTEX-11ONC-2226-SM-5HL6D	GTEX-11ONC	0.497604	Male	65	Fast Death of Natural Causes	Testis	Testis
GTEX-11ONC-2326-SM-5HL6P	GTEX-11ONC	0.0898736	Male	65	Fast Death of Natural Causes	Nerve	Nerve - Tibial
GTEX-11ONC-2426-SM-5GU7H	GTEX-11ONC	0.349227	Male	65	Fast Death of Natural Causes	Muscle	Muscle - Skeletal
GTEX-11ONC-2526-SM-5986W	GTEX-11ONC	0.0612073	Male	65	Fast Death of Natural Causes	Adipose Tissue	Adipose - Subcutaneous
GTEX-11ONC-2726-SM-5N9DZ	GTEX-11ONC	0.0597156	Male	65	Fast Death of Natural Causes	Blood Vessel	Artery - Tibial
GTEX-11ONC-2826-SM-5P9GQ	GTEX-11ONC	0.19408	Male	65	Fast Death of Natural Causes	Pituitary	Pituitary
GTEX-11ONC-2926-SM-5P9JM	GTEX-11ONC	0.421453	Male	65	Fast Death of Natural Causes	Brain	Brain - Cortex
GTEX-11ONC-3026-SM-5985W	GTEX-11ONC	0.524966	Male	65	Fast Death of Natural Causes	Brain	Brain - Cerebellum
GTEX-11P7K-0003-SM-5S2OU	GTEX-11P7K	0.887429	Male	35	Ventilator Case	Blood	Cells - EBV-transformed lymphocytes
GTEX-11P7K-0006-SM-5N9FM	GTEX-11P7K	0.544601	Male	35	Ventilator Case	Blood	Whole Blood
GTEX-11P7K-0008-SM-5S2O5	GTEX-11P7K	0.392439	Male	35	Ventilator Case	Skin	Cells - Cultured fibroblasts
GTEX-11P7K-0126-SM-5986E	GTEX-11P7K	0.254703	Male	35	Ventilator Case	Adrenal Gland	Adrenal Gland
GTEX-11P7K-0226-SM-5986Z	GTEX-11P7K	0.198639	Male	35	Ventilator Case	Thyroid	Thyroid
GTEX-11P7K-0326-SM-59871	GTEX-11P7K	0.236046	Male	35	Ventilator Case	Lung	Lung
GTEX-11P7K-0426-SM-5BC5H	GTEX-11P7K	0.384944	Male	35	Ventilator Case	Spleen	Spleen
GTEX-11P7K-0526-SM-5BC5I	GTEX-11P7K	0.367947	Male	35	Ventilator Case	Pancreas	Pancreas
GTEX-11P7K-0626-SM-5985Z	GTEX-11P7K	0.182108	Male	35	Ventilator Case	Prostate	Prostate
GTEX-11P7K-0726-SM-5EGKX	GTEX-11P7K	0.191502	Male	35	Ventilator Case	Breast	Breast - Mammary Tissue
GTEX-11P7K-0826-SM-5BC5F	GTEX-11P7K	0.212701	Male	35	Ventilator Case	Adipose Tissue	Adipose - Visceral (Omentum)
GTEX-11P7K-1026-SM-5HL6Y	GTEX-11P7K	0.43731	Male	35	Ventilator Case	Testis	Testis
GTEX-11P7K-1126-SM-5HL4L	GTEX-11P7K	0.320036	Male	35	Ventilator Case	Skin	Skin - Not Sun Exposed (Suprapubic)
GTEX-11P7K-1226-SM-5HL4X	GTEX-11P7K	0.189878	Male	35	Ventilator Case	Esophagus	Esophagus - Muscularis
GTEX-11P7K-1326-SM-5BC5G	GTEX-11P7K	0.459641	Male	35	Ventilator Case	Esophagus	Esophagus - Mucosa
GTEX-11P7K-1426-SM-5EGKY	GTEX-11P7K	0.157685	Male	35	Ventilator Case	Esophagus	Esophagus - Gastroesophageal Junction
GTEX-11P7K-1526-SM-5EGI7	GTEX-11P7K	0.331891	Male	35	Ventilator Case	Colon	Colon - Transverse
GTEX-11P7K-1626-SM-5GU63	GTEX-11P7K	0.347409	Male	35	Ventilator Case	Small Intestine	Small Intestine - Terminal Ileum
GTEX-11P7K-1726-SM-5GU6F	GTEX-11P7K	0.156571	Male	35	Ventilator Case	Stomach	Stomach
GTEX-11P7K-1826-SM-5HL5A	GTEX-11P7K	0.199818	Male	35	Ventilator Case	Colon	Colon - Sigmoid
GTEX-11P7K-1926-SM-5GU6R	GTEX-11P7K	0.46418	Male	35	Ventilator Case	Muscle	Muscle - Skeletal
GTEX-11P7K-2026-SM-5GU74	GTEX-11P7K	0.190325	Male	35	Ventilator Case	Adipose Tissue	Adipose - Subcutaneous
GTEX-11P7K-2126-SM-5GU7G	GTEX-11P7K	0.23468	Male	35	Ventilator Case	Skin	Skin - Sun Exposed (Lower leg)
GTEX-11P7K-2226-SM-5GU56	GTEX-11P7K	0.198396	Male	35	Ventilator Case	Nerve	Nerve - Tibial
GTEX-11P7K-2326-SM-5EGKZ	GTEX-11P7K	0.123749	Male	35	Ventilator Case	Blood Vessel	Artery - Tibial
GTEX-11P81-0006-SM-5NQ7A	GTEX-11P81	0.529514	Female	35	Ventilator Case	Blood	Whole Blood
GTEX-11P81-0008-SM-5S2OT	GTEX-11P81	0.423578	Female	35	Ventilator Case	Skin	Cells - Cultured fibroblasts
GTEX-11P81-0126-SM-5HL5Y	GTEX-11P81	0.211622	Female	35	Ventilator Case	Thyroid	Thyroid
GTEX-11P81-0226-SM-5HL5M	GTEX-11P81	0.199954	Female	35	Ventilator Case	Lung	Lung
GTEX-11P81-0326-SM-5HL6B	GTEX-11P81	0.109769	Female	35	Ventilator Case	Blood Vessel	Artery - Aorta
GTEX-11P81-0526-SM-59873	GTEX-11P81	0.199037	Female	35	Ventilator Case	Heart	Heart - Atrial Appendage
GTEX-11P81-0726-SM-5PNYH	GTEX-11P81	0.168537	Female	35	Ventilator Case	Adipose Tissue	Adipose - Visceral (Omentum)
GTEX-11P81-0826-SM-5P9GR	GTEX-11P81	0.47364	Female	35	Ventilator Case	Esophagus	Esophagus - Mucosa
GTEX-11P81-0926-SM-59874	GTEX-11P81	0.171361	Female	35	Ventilator Case	Esophagus	Esophagus - Muscularis
GTEX-11P81-1026-SM-5GU54	GTEX-11P81	0.168186	Female	35	Ventilator Case	Esophagus	Esophagus - Gastroesophageal Junction
GTEX-11P81-1126-SM-5GU5G	GTEX-11P81	0.164319	Female	35	Ventilator Case	Colon	Colon - Transverse
GTEX-11P81-1326-SM-5GU5S	GTEX-11P81	0.389842	Female	35	Ventilator Case	Spleen	Spleen
GTEX-11P81-1426-SM-5P9JN	GTEX-11P81	0.183311	Female	35	Ventilator Case	Colon	Colon - Sigmoid
GTEX-11P81-1526-SM-5P9GS	GTEX-11P81	0.170868	Female	35	Ventilator Case	Ovary	Ovary
GTEX-11P81-1626-SM-5BC52	GTEX-11P81	0.111758	Female	35	Ventilator Case	Uterus	Uterus
GTEX-11P81-1926-SM-5BC53	GTEX-11P81	0.166602	Female	35	Ventilator Case	Breast	Breast - Mammary Tissue
GTEX-11P81-2026-SM-5P9GT	GTEX-11P81	0.288918	Female	35	Ventilator Case	Salivary Gland	Minor Salivary Gland
GTEX-11P81-2126-SM-5HL6N	GTEX-11P81	0.287932	Female	35	Ventilator Case	Vagina	Vagina
GTEX-11P81-2226-SM-5PNYI	GTEX-11P81	0.307222	Female	35	Ventilator Case	Skin	Skin - Not Sun Exposed (Suprapubic)
GTEX-11P81-2326-SM-59875	GTEX-11P81	0.29804	Female	35	Ventilator Case	Skin	Skin - Sun Exposed (Lower leg)
GTEX-11P81-2426-SM-5GU65	GTEX-11P81	0.119028	Female	35	Ventilator Case	Adipose Tissue	Adipose - Subcutaneous
GTEX-11P81-2526-SM-5GU6H	GTEX-11P81	0.431322	Female	35	Ventilator Case	Muscle	Muscle - Skeletal
GTEX-11P81-2626-SM-5GU6T	GTEX-11P81	0.147543	Female	35	Ventilator Case	Nerve	Nerve - Tibial
GTEX-11P81-2726-SM-59876	GTEX-11P81	0.140036	Female	35	Ventilator Case	Blood Vessel	Artery - Tibial
GTEX-11P82-0006-SM-5N9FY	GTEX-11P82	0.535367	Male	25	Violent and Fast Death	Blood	Whole Blood
GTEX-11P82-0008-SM-5S2MS	GTEX-11P82	0.285783	Male	25	Violent and Fast Death	Skin	Cells - Cultured fibroblasts
GTEX-11P82-0126-SM-5HL72	GTEX-11P82	0.124122	Male	25	Violent and Fast Death	Blood Vessel	Artery - Aorta
GTEX-11P82-0226-SM-5HL4O	GTEX-11P82	0.206083	Male	25	Violent and Fast Death	Thyroid	Thyroid
GTEX-11P82-0326-SM-5HL51	GTEX-11P82	0.244033	Male	25	Violent and Fast Death	Adipose Tissue	Adipose - Visceral (Omentum)
GTEX-11P82-0426-SM-5HL5D	GTEX-11P82	0.140714	Male	25	Violent and Fast Death	Esophagus	Esophagus - Gastroesophageal Junction
GTEX-11P82-0526-SM-5986P	GTEX-11P82	0.411838	Male	25	Violent and Fast Death	Esophagus	Esophagus - Mucosa
GTEX-11P82-0626-SM-5PNYK	GTEX-11P82	0.172607	Male	25	Violent and Fast Death	Esophagus	Esophagus - Muscularis
GTEX-11P82-0726-SM-5PNYL	GTEX-11P82	0.132737	Male	25	Violent and Fast Death	Stomach	Stomach
GTEX-11P82-0826-SM-5P9GU	GTEX-11P82	0.439421	Male	25	Violent and Fast Death	Small Intestine	Small Intestine - Terminal Ileum
GTEX-11P82-0926-SM-5986X	GTEX-11P82	0.294451	Male	25	Violent and Fast Death	Salivary Gland	Minor Salivary Gland
GTEX-11P82-1026-SM-5BC5J	GTEX-11P82	0.424484	Male	25	Violent and Fast Death	Colon	Colon - Transverse
GTEX-11P82-1126-SM-5BC5K	GTEX-11P82	0.221467	Male	25	Violent and Fast Death	Prostate	Prostate
GTEX-11P82-1326-SM-5HL62	GTEX-11P82	0.341275	Male	25	Violent and Fast Death	Breast	Breast - Mammary Tissue
GTEX-11P82-1426-SM-DTXFY	GTEX-11P82	0.339287	Male	25	Violent and Fast Death	Skin	Skin - Not Sun Exposed (Suprapubic)
GTEX-11P82-1526-SM-5BC5M	GTEX-11P82	0.558023	Male	25	Violent and Fast Death	Testis	Testis
GTEX-11P82-1626-SM-59879	GTEX-11P82	0.26017	Male	25	Violent and Fast Death	Skin	Skin - Sun Exposed (Lower leg)
GTEX-11P82-1726-SM-5Q5AT	GTEX-11P82	0.237374	Male	25	Violent and Fast Death	Adipose Tissue	Adipose - Subcutaneous
GTEX-11P82-1826-SM-5PNYJ	GTEX-11P82	0.497116	Male	25	Violent and Fast Death	Muscle	Muscle - Skeletal
GTEX-11P82-1926-SM-5Q5AU	GTEX-11P82	0.182871	Male	25	Violent and Fast Death	Nerve	Nerve - Tibial
GTEX-11PRG-0005-SM-5NQ6X	GTEX-11PRG	0.456787	Male	55	Fast Death of Natural Causes	Blood	Whole Blood
GTEX-11PRG-0008-SM-5S2N5	GTEX-11PRG	0.255917	Male	55	Fast Death of Natural Causes	Skin	Cells - Cultured fibroblasts
GTEX-11PRG-0011-R10b-SM-DO93G	GTEX-11PRG	0.529602	Male	55	Fast Death of Natural Causes	Brain	Brain - Frontal Cortex (BA9)
GTEX-11PRG-0011-R11b-SM-DNZZY	GTEX-11PRG	0.582792	Male	55	Fast Death of Natural Causes	Brain	Brain - Cerebellar Hemisphere
GTEX-11PRG-0011-R2a-SM-69LQ5	GTEX-11PRG	0.387001	Male	55	Fast Death of Natural Causes	Brain	Brain - Substantia nigra
GTEX-11PRG-0011-R4a-SM-DNZZR	GTEX-11PRG	0.456584	Male	55	Fast Death of Natural Causes	Brain	Brain - Amygdala
GTEX-11PRG-0011-R5b-SM-DNZZS	GTEX-11PRG	0.505159	Male	55	Fast Death of Natural Causes	Brain	Brain - Caudate (basal ganglia)
GTEX-11PRG-0011-R6b-SM-DO923	GTEX-11PRG	0.447124	Male	55	Fast Death of Natural Causes	Brain	Brain - Nucleus accumbens (basal ganglia)
GTEX-11PRG-0011-R7a-SM-DNZZT	GTEX-11PRG	0.512039	Male	55	Fast Death of Natural Causes	Brain	Brain - Putamen (basal ganglia)
GTEX-11PRG-0126-SM-5BC55	GTEX-11PRG	0.0662432	Male	55	Fast Death of Natural Causes	Nerve	Nerve - Tibial
GTEX-11PRG-0326-SM-5GU53	GTEX-11PRG	0.314112	Male	55	Fast Death of Natural Causes	Muscle	Muscle - Skeletal
GTEX-11PRG-0626-SM-5BC56	GTEX-11PRG	0.121492	Male	55	Fast Death of Natural Causes	Adipose Tissue	Adipose - Subcutaneous
GTEX-11PRG-0726-SM-5EGL1	GTEX-11PRG	0.42236	Male	55	Fast Death of Natural Causes	Skin	Skin - Not Sun Exposed (Suprapubic)
GTEX-11PRG-0826-SM-5EQ6A	GTEX-11PRG	0.177442	Male	55	Fast Death of Natural Causes	Breast	Breast - Mammary Tissue
GTEX-11PRG-0926-SM-5EGI8	GTEX-11PRG	0.0626974	Male	55	Fast Death of Natural Causes	Lung	Lung
GTEX-11PRG-1526-SM-5HL6Z	GTEX-11PRG	0.0964486	Male	55	Fast Death of Natural Causes	Adipose Tissue	Adipose - Visceral (Omentum)
GTEX-11PRG-2026-SM-5GU5F	GTEX-11PRG	0.0453689	Male	55	Fast Death of Natural Causes	Colon	Colon - Sigmoid
GTEX-11PRG-2826-SM-5BC54	GTEX-11PRG	0.521178	Male	55	Fast Death of Natural Causes	Brain	Brain - Cerebellum
GTEX-11PRG-2926-SM-5987A	GTEX-11PRG	0.486893	Male	55	Fast Death of Natural Causes	Brain	Brain - Cortex
GTEX-11TT1-0004-SM-5S2NT	GTEX-11TT1	0.848374	Male	25	Ventilator Case	Blood	Cells - EBV-transformed lymphocytes
GTEX-11TT1-0005-SM-5NQ8Y	GTEX-11TT1	0.549953	Male	25	Ventilator Case	Blood	Whole Blood
GTEX-11TT1-0008-SM-5S2P8	GTEX-11TT1	0.446815	Male	25	Ventilator Case	Skin	Cells - Cultured fibroblasts
GTEX-11TT1-0126-SM-5LUAA	GTEX-11TT1	0.353641	Male	25	Ventilator Case	Adrenal Gland	Adrenal Gland
GTEX-11TT1-0326-SM-5LUAY	GTEX-11TT1	0.435931	Male	25	Ventilator Case	Pancreas	Pancreas
GTEX-11TT1-0426-SM-5EGI9	GTEX-11TT1	0.263719	Male	25	Ventilator Case	Esophagus	Esophagus - Muscularis
GTEX-11TT1-0526-SM-5P9JO	GTEX-11TT1	0.52588	Male	25	Ventilator Case	Esophagus	Esophagus - Mucosa
GTEX-11TT1-0626-SM-5GU4X	GTEX-11TT1	0.237229	Male	25	Ventilator Case	Esophagus	Esophagus - Gastroesophageal Junction
GTEX-11TT1-0726-SM-5GU5A	GTEX-11TT1	0.44382	Male	25	Ventilator Case	Stomach	Stomach
GTEX-11TT1-0926-SM-5GU5M	GTEX-11TT1	0.294809	Male	25	Ventilator Case	Colon	Colon - Sigmoid
GTEX-11TT1-1026-SM-5PNW7	GTEX-11TT1	0.508684	Male	25	Ventilator Case	Colon	Colon - Transverse
GTEX-11TT1-1126-SM-5P9GV	GTEX-11TT1	0.254188	Male	25	Ventilator Case	Thyroid	Thyroid
GTEX-11TT1-1226-SM-5Q5AV	GTEX-11TT1	0.253682	Male	25	Ventilator Case	Blood Vessel	Artery - Aorta
GTEX-11TT1-1326-SM-5PNYM	GTEX-11TT1	0.354619	Male	25	Ventilator Case	Heart	Heart - Left Ventricle
GTEX-11TT1-1426-SM-5EGIA	GTEX-11TT1	0.306455	Male	25	Ventilator Case	Heart	Heart - Atrial Appendage
GTEX-11TT1-1526-SM-5EQKU	GTEX-11TT1	0.244504	Male	25	Ventilator Case	Blood Vessel	Artery - Coronary
GTEX-11TT1-1626-SM-5EQL7	GTEX-11TT1	0.33563	Male	25	Ventilator Case	Lung	Lung
GTEX-11TT1-1726-SM-5EQLJ	GTEX-11TT1	0.515849	Male	25	Ventilator Case	Liver	Liver
GTEX-11TT1-1826-SM-5EQLV	GTEX-11TT1	0.278118	Male	25	Ventilator Case	Skin	Skin - Not Sun Exposed (Suprapubic)
GTEX-11TT1-1926-SM-5PNYN	GTEX-11TT1	0.376877	Male	25	Ventilator Case	Adipose Tissue	Adipose - Visceral (Omentum)
GTEX-11TT1-2026-SM-5EQM8	GTEX-11TT1	0.200804	Male	25	Ventilator Case	Prostate	Prostate
GTEX-11TT1-2126-SM-5GU5Y	GTEX-11TT1	0.295772	Male	25	Ventilator Case	Breast	Breast - Mammary Tissue
GTEX-11TT1-2226-SM-5GU6B	GTEX-11TT1	0.488197	Male	25	Ventilator Case	Testis	Testis
GTEX-11TT1-2326-SM-5GU6N	GTEX-11TT1	0.510057	Male	25	Ventilator Case	Muscle	Muscle - Skeletal
GTEX-11TT1-2426-SM-5EQMK	GTEX-11TT1	0.264107	Male	25	Ventilator Case	Adipose Tissue	Adipose - Subcutaneous
GTEX-11TT1-2526-SM-5EGIB	GTEX-11TT1	0.329791	Male	25	Ventilator Case	Skin	Skin - Sun Exposed (Lower leg)
GTEX-11TT1-2626-SM-5EGL2	GTEX-11TT1	0.252386	Male	25	Ventilator Case	Nerve	Nerve - Tibial
GTEX-11TT1-2726-SM-5LU8L	GTEX-11TT1	0.258176	Male	25	Ventilator Case	Blood Vessel	Artery - Tibial
GTEX-11TTK-0005-SM-5O9BX	GTEX-11TTK	0.526555	Female	65	Slow Death	Blood	Whole Blood
GTEX-11TTK-0008-SM-5S2RU	GTEX-11TTK	0.246456	Female	65	Slow Death	Skin	Cells - Cultured fibroblasts
GTEX-11TTK-0011-R10b-SM-DO925	GTEX-11TTK	0.39458	Female	65	Slow Death	Brain	Brain - Frontal Cortex (BA9)
GTEX-11TTK-0011-R11b-SM-DO112	GTEX-11TTK	0.564104	Female	65	Slow Death	Brain	Brain - Cerebellar Hemisphere
GTEX-11TTK-0011-R4a-SM-DNZZU	GTEX-11TTK	0.366319	Female	65	Slow Death	Brain	Brain - Amygdala
GTEX-11TTK-0011-R5a-SM-DNZZV	GTEX-11TTK	0.404727	Female	65	Slow Death	Brain	Brain - Caudate (basal ganglia)
GTEX-11TTK-0011-R6b-SM-DNZZW	GTEX-11TTK	0.414158	Female	65	Slow Death	Brain	Brain - Nucleus accumbens (basal ganglia)
GTEX-11TTK-0011-R7b-SM-DNZZZ	GTEX-11TTK	0.431827	Female	65	Slow Death	Brain	Brain - Putamen (basal ganglia)
GTEX-11TTK-0011-R8b-SM-DO111	GTEX-11TTK	0.342825	Female	65	Slow Death	Brain	Brain - Hypothalamus
GTEX-11TTK-0126-SM-5987B	GTEX-11TTK	0.162063	Female	65	Slow Death	Skin	Skin - Sun Exposed (Lower leg)
GTEX-11TTK-0226-SM-5N9EC	GTEX-11TTK	0.123566	Female	65	Slow Death	Adipose Tissue	Adipose - Subcutaneous
GTEX-11TTK-0326-SM-5BC5N	GTEX-11TTK	0.372038	Female	65	Slow Death	Muscle	Muscle - Skeletal
GTEX-11TTK-0426-SM-5EQLT	GTEX-11TTK	0.12946	Female	65	Slow Death	Nerve	Nerve - Tibial
GTEX-11TTK-0826-SM-5N9EG	GTEX-11TTK	0.228572	Female	65	Slow Death	Thyroid	Thyroid
GTEX-11TTK-1926-SM-5PNW8	GTEX-11TTK	0.156554	Female	65	Slow Death	Kidney	Kidney - Cortex
GTEX-11TTK-2426-SM-5PNYO	GTEX-11TTK	0.11408	Female	65	Slow Death	Colon	Colon - Transverse
GTEX-11TTK-2726-SM-5GU58	GTEX-11TTK	0.260058	Female	65	Slow Death	Vagina	Vagina
GTEX-11TTK-2826-SM-5GU5K	GTEX-11TTK	0.480073	Female	65	Slow Death	Brain	Brain - Cerebellum
GTEX-11TTK-2926-SM-5PNYP	GTEX-11TTK	0.392367	Female	65	Slow Death	Brain	Brain - Cortex
GTEX-11TUW-0006-SM-5LZW2	GTEX-11TUW	0.514614	Male	65	Fast Death of Natural Causes	Blood	Whole Blood
GTEX-11TUW-0008-SM-5SI6S	GTEX-11TUW	0.180075	Male	65	Fast Death of Natural Causes	Skin	Cells - Cultured fibroblasts
GTEX-11TUW-0011-R10a-SM-DO924	GTEX-11TUW	0.367111	Male	65	Fast Death of Natural Causes	Brain	Brain - Frontal Cortex (BA9)
GTEX-11TUW-0011-R1a-SM-DO92S	GTEX-11TUW	0.313261	Male	65	Fast Death of Natural Causes	Brain	Brain - Hippocampus
GTEX-11TUW-0011-R2b-SM-DO92T	GTEX-11TUW	0.369204	Male	65	Fast Death of Natural Causes	Brain	Brain - Substantia nigra
GTEX-11TUW-0226-SM-5LU8X	GTEX-11TUW	0.207168	Male	65	Fast Death of Natural Causes	Thyroid	Thyroid
GTEX-11TUW-0526-SM-5LU9A	GTEX-11TUW	0.140736	Male	65	Fast Death of Natural Causes	Lung	Lung
GTEX-11TUW-0626-SM-5LU9M	GTEX-11TUW	0.384188	Male	65	Fast Death of Natural Causes	Skin	Skin - Not Sun Exposed (Suprapubic)
GTEX-11TUW-0926-SM-5EQMW	GTEX-11TUW	0.162049	Male	65	Fast Death of Natural Causes	Blood Vessel	Artery - Aorta
GTEX-11TUW-1026-SM-5GU7D	GTEX-11TUW	0.225807	Male	65	Fast Death of Natural Causes	Heart	Heart - Left Ventricle
GTEX-11TUW-1126-SM-5EQKJ	GTEX-11TUW	0.232338	Male	65	Fast Death of Natural Causes	Heart	Heart - Atrial Appendage
GTEX-11TUW-1226-SM-5GU7C	GTEX-11TUW	0.160525	Male	65	Fast Death of Natural Causes	Esophagus	Esophagus - Muscularis
GTEX-11TUW-1326-SM-5EQKV	GTEX-11TUW	0.348129	Male	65	Fast Death of Natural Causes	Esophagus	Esophagus - Mucosa
GTEX-11TUW-1726-SM-5BC5C	GTEX-11TUW	0.437961	Male	65	Fast Death of Natural Causes	Liver	Liver
GTEX-11TUW-1826-SM-5BC5D	GTEX-11TUW	0.279137	Male	65	Fast Death of Natural Causes	Breast	Breast - Mammary Tissue
GTEX-11TUW-1926-SM-5BC58	GTEX-11TUW	0.332669	Male	65	Fast Death of Natural Causes	Small Intestine	Small Intestine - Terminal Ileum
GTEX-11TUW-2026-SM-5EQL8	GTEX-11TUW	0.176796	Male	65	Fast Death of Natural Causes	Colon	Colon - Transverse
GTEX-11TUW-2126-SM-5GU7B	GTEX-11TUW	0.275975	Male	65	Fast Death of Natural Causes	Prostate	Prostate
GTEX-11TUW-2226-SM-5EQL9	GTEX-11TUW	0.560092	Male	65	Fast Death of Natural Causes	Testis	Testis
GTEX-11TUW-2326-SM-5EQMO	GTEX-11TUW	0.164143	Male	65	Fast Death of Natural Causes	Colon	Colon - Sigmoid
GTEX-11TUW-2426-SM-5EQKB	GTEX-11TUW	0.280221	Male	65	Fast Death of Natural Causes	Salivary Gland	Minor Salivary Gland
GTEX-11TUW-2526-SM-5EQKN	GTEX-11TUW	0.372372	Male	65	Fast Death of Natural Causes	Muscle	Muscle - Skeletal
GTEX-11TUW-2626-SM-5EQKZ	GTEX-11TUW	0.18076	Male	65	Fast Death of Natural Causes	Adipose Tissue	Adipose - Subcutaneous
GTEX-11TUW-2726-SM-E9J4M	GTEX-11TUW	0.355424	Male	65	Fast Death of Natural Causes	Skin	Skin - Sun Exposed (Lower leg)
GTEX-11TUW-2926-SM-5BC59	GTEX-11TUW	0.130009	Male	65	Fast Death of Natural Causes	Blood Vessel	Artery - Tibial
GTEX-11TUW-3026-SM-5EGKM	GTEX-11TUW	0.379169	Male	65	Fast Death of Natural Causes	Pituitary	Pituitary
GTEX-11UD1-0008-SM-5S2P6	GTEX-11UD1	0.295539	Female	45	Intermediate Death	Skin	Cells - Cultured fibroblasts
GTEX-11UD1-0011-R1b-SM-5BC7D	GTEX-11UD1	0.370131	Female	45	Intermediate Death	Brain	Brain - Hippocampus
GTEX-11UD1-0011-R2b-SM-5BC6O	GTEX-11UD1	0.343649	Female	45	Intermediate Death	Brain	Brain - Substantia nigra
GTEX-11UD1-0011-R3a-SM-5BC6S	GTEX-11UD1	0.394946	Female	45	Intermediate Death	Brain	Brain - Anterior cingulate cortex (BA24)
GTEX-11UD1-0011-R5b-SM-5P9FP	GTEX-11UD1	0.329398	Female	45	Intermediate Death	Brain	Brain - Caudate (basal ganglia)
GTEX-11UD1-0126-SM-5PNYG	GTEX-11UD1	0.307551	Female	45	Intermediate Death	Skin	Skin - Sun Exposed (Lower leg)
GTEX-11UD1-0226-SM-5EQKL	GTEX-11UD1	0.125462	Female	45	Intermediate Death	Adipose Tissue	Adipose - Subcutaneous
GTEX-11UD1-0326-SM-5EQKX	GTEX-11UD1	0.28112	Female	45	Intermediate Death	Muscle	Muscle - Skeletal
GTEX-11UD2-0005-SM-5NQ9B	GTEX-11UD2	0.487745	Male	55	Fast Death of Natural Causes	Blood	Whole Blood
GTEX-11UD2-0008-SM-5S2P7	GTEX-11UD2	0.282504	Male	55	Fast Death of Natural Causes	Skin	Cells - Cultured fibroblasts
GTEX-11UD2-0011-R9b-SM-DO926	GTEX-11UD2	0.352304	Male	55	Fast Death of Natural Causes	Brain	Brain - Spinal cord (cervical c-1)
GTEX-11UD2-0126-SM-5EQL2	GTEX-11UD2	0.125469	Male	55	Fast Death of Natural Causes	Adipose Tissue	Adipose - Subcutaneous
GTEX-11UD2-0226-SM-5EQKY	GTEX-11UD2	0.346577	Male	55	Fast Death of Natural Causes	Skin	Skin - Sun Exposed (Lower leg)
GTEX-11UD2-0326-SM-5EQLE	GTEX-11UD2	0.360108	Male	55	Fast Death of Natural Causes	Muscle	Muscle - Skeletal
GTEX-11UD2-0426-SM-5EQ5W	GTEX-11UD2	0.113661	Male	55	Fast Death of Natural Causes	Nerve	Nerve - Tibial
GTEX-11UD2-0526-SM-5GU69	GTEX-11UD2	0.0881732	Male	55	Fast Death of Natural Causes	Blood Vessel	Artery - Tibial
GTEX-11UD2-0626-SM-5GU6L	GTEX-11UD2	0.247665	Male	55	Fast Death of Natural Causes	Thyroid	Thyroid
GTEX-11UD2-0726-SM-5EQ69	GTEX-11UD2	0.202595	Male	55	Fast Death of Natural Causes	Lung	Lung
GTEX-11UD2-0826-SM-5EQKS	GTEX-11UD2	0.0929924	Male	55	Fast Death of Natural Causes	Blood Vessel	Artery - Aorta
GTEX-11UD2-0926-SM-5CVL6	GTEX-11UD2	0.225835	Male	55	Fast Death of Natural Causes	Heart	Heart - Atrial Appendage
GTEX-11UD2-1126-SM-5EQM6	GTEX-11UD2	0.0961098	Male	55	Fast Death of Natural Causes	Blood Vessel	Artery - Coronary
GTEX-11UD2-1226-SM-5EQMI	GTEX-11UD2	0.113161	Male	55	Fast Death of Natural Causes	Esophagus	Esophagus - Muscularis
GTEX-11UD2-1526-SM-5EQLQ	GTEX-11UD2	0.119798	Male	55	Fast Death of Natural Causes	Esophagus	Esophagus - Gastroesophageal Junction
GTEX-11UD2-2526-SM-5CVNU	GTEX-11UD2	0.311418	Male	55	Fast Death of Natural Causes	Skin	Skin - Not Sun Exposed (Suprapubic)
GTEX-11VI4-0001-SM-5S2OI	GTEX-11VI4	0.892353	Female	45	Ventilator Case	Blood	Cells - EBV-transformed lymphocytes
GTEX-11VI4-0006-SM-5N9D8	GTEX-11VI4	0.546182	Female	45	Ventilator Case	Blood	Whole Blood
GTEX-11VI4-0126-SM-5GU6Z	GTEX-11VI4	0.42327	Female	45	Ventilator Case	Spleen	Spleen
GTEX-11VI4-0226-SM-5GU6C	GTEX-11VI4	0.265714	Female	45	Ventilator Case	Thyroid	Thyroid
GTEX-11VI4-0326-SM-5EQ6L	GTEX-11VI4	0.138347	Female	45	Ventilator Case	Stomach	Stomach
GTEX-11VI4-0426-SM-5EGHZ	GTEX-11VI4	0.385116	Female	45	Ventilator Case	Pancreas	Pancreas
GTEX-11VI4-0526-SM-5EQ48	GTEX-11VI4	0.309607	Female	45	Ventilator Case	Esophagus	Esophagus - Mucosa
GTEX-11VI4-0626-SM-5EQLO	GTEX-11VI4	0.183443	Female	45	Ventilator Case	Esophagus	Esophagus - Muscularis
GTEX-11VI4-0726-SM-5GU5B	GTEX-11VI4	0.320985	Female	45	Ventilator Case	Vagina	Vagina
GTEX-11VI4-0826-SM-5GU5N	GTEX-11VI4	0.148432	Female	45	Ventilator Case	Esophagus	Esophagus - Gastroesophageal Junction
GTEX-11VI4-1026-SM-5EQM1	GTEX-11VI4	0.184778	Female	45	Ventilator Case	Ovary	Ovary
GTEX-11VI4-1126-SM-5EQMD	GTEX-11VI4	0.307837	Female	45	Ventilator Case	Skin	Skin - Not Sun Exposed (Suprapubic)
GTEX-11VI4-1226-SM-5EQMP	GTEX-11VI4	0.148382	Female	45	Ventilator Case	Adipose Tissue	Adipose - Visceral (Omentum)
GTEX-11VI4-1426-SM-5GU6O	GTEX-11VI4	0.221891	Female	45	Ventilator Case	Colon	Colon - Sigmoid
GTEX-11VI4-1526-SM-5EQKC	GTEX-11VI4	0.341477	Female	45	Ventilator Case	Colon	Colon - Transverse
GTEX-11VI4-1626-SM-5EQKO	GTEX-11VI4	0.440141	Female	45	Ventilator Case	Small Intestine	Small Intestine - Terminal Ileum
GTEX-11VI4-1726-SM-5CVLH	GTEX-11VI4	0.246695	Female	45	Ventilator Case	Skin	Skin - Sun Exposed (Lower leg)
GTEX-11VI4-1926-SM-5CVLI	GTEX-11VI4	0.461729	Female	45	Ventilator Case	Muscle	Muscle - Skeletal
GTEX-11VI4-2026-SM-5CVLJ	GTEX-11VI4	0.168957	Female	45	Ventilator Case	Blood Vessel	Artery - Tibial
GTEX-11VI4-2126-SM-5EGI1	GTEX-11VI4	0.164388	Female	45	Ventilator Case	Nerve	Nerve - Tibial
GTEX-11WQC-0006-SM-5LZVP	GTEX-11WQC	0.501535	Male	65	Fast Death of Natural Causes	Blood	Whole Blood
GTEX-11WQC-0008-SM-5SI6R	GTEX-11WQC	0.192587	Male	65	Fast Death of Natural Causes	Skin	Cells - Cultured fibroblasts
GTEX-11WQC-0011-R10a-SM-57WCT	GTEX-11WQC	0.455659	Male	65	Fast Death of Natural Causes	Brain	Brain - Frontal Cortex (BA9)
GTEX-11WQC-0011-R11b-SM-57WD6	GTEX-11WQC	0.555644	Male	65	Fast Death of Natural Causes	Brain	Brain - Cerebellar Hemisphere
GTEX-11WQC-0011-R1b-SM-DO932	GTEX-11WQC	0.330744	Male	65	Fast Death of Natural Causes	Brain	Brain - Hippocampus
GTEX-11WQC-0011-R2a-SM-DO927	GTEX-11WQC	0.360124	Male	65	Fast Death of Natural Causes	Brain	Brain - Substantia nigra
GTEX-11WQC-0011-R3a-SM-DO11T	GTEX-11WQC	0.384862	Male	65	Fast Death of Natural Causes	Brain	Brain - Anterior cingulate cortex (BA24)
GTEX-11WQC-0011-R5a-SM-5BC74	GTEX-11WQC	0.363475	Male	65	Fast Death of Natural Causes	Brain	Brain - Caudate (basal ganglia)
GTEX-11WQC-0011-R6a-SM-5BC77	GTEX-11WQC	0.417393	Male	65	Fast Death of Natural Causes	Brain	Brain - Nucleus accumbens (basal ganglia)
GTEX-11WQC-0011-R7b-SM-5BC7A	GTEX-11WQC	0.350334	Male	65	Fast Death of Natural Causes	Brain	Brain - Putamen (basal ganglia)
GTEX-11WQC-0011-R8b-SM-57WCH	GTEX-11WQC	0.394514	Male	65	Fast Death of Natural Causes	Brain	Brain - Hypothalamus
GTEX-11WQC-0626-SM-5EQMF	GTEX-11WQC	0.0757074	Male	65	Fast Death of Natural Causes	Lung	Lung
GTEX-11WQC-0726-SM-5EQMR	GTEX-11WQC	0.358362	Male	65	Fast Death of Natural Causes	Liver	Liver
GTEX-11WQC-1726-SM-5GU4W	GTEX-11WQC	0.106375	Male	65	Fast Death of Natural Causes	Breast	Breast - Mammary Tissue
GTEX-11WQC-1826-SM-5GU59	GTEX-11WQC	0.343726	Male	65	Fast Death of Natural Causes	Skin	Skin - Not Sun Exposed (Suprapubic)
GTEX-11WQC-2326-SM-5EQKE	GTEX-11WQC	0.585273	Male	65	Fast Death of Natural Causes	Testis	Testis
GTEX-11WQC-2426-SM-5EQKQ	GTEX-11WQC	0.154635	Male	65	Fast Death of Natural Causes	Adipose Tissue	Adipose - Subcutaneous
GTEX-11WQC-2526-SM-5CVLE	GTEX-11WQC	0.293869	Male	65	Fast Death of Natural Causes	Skin	Skin - Sun Exposed (Lower leg)
GTEX-11WQC-2626-SM-5CVLF	GTEX-11WQC	0.314835	Male	65	Fast Death of Natural Causes	Muscle	Muscle - Skeletal
GTEX-11WQC-2726-SM-5CVLG	GTEX-11WQC	0.0889976	Male	65	Fast Death of Natural Causes	Blood Vessel	Artery - Tibial
GTEX-11WQC-2826-SM-5GU7A	GTEX-11WQC	0.0487075	Male	65	Fast Death of Natural Causes	Nerve	Nerve - Tibial
GTEX-11WQK-0005-SM-5O9AV	GTEX-11WQK	0.597666	Male	55	Fast Death of Natural Causes	Blood	Whole Blood
GTEX-11WQK-0008-SM-5SI6T	GTEX-11WQK	0.254011	Male	55	Fast Death of Natural Causes	Skin	Cells - Cultured fibroblasts
GTEX-11WQK-0011-R10a-SM-5BC6R	GTEX-11WQK	0.425271	Male	55	Fast Death of Natural Causes	Brain	Brain - Frontal Cortex (BA9)
GTEX-11WQK-0011-R3b-SM-DO93K	GTEX-11WQK	0.39095	Male	55	Fast Death of Natural Causes	Brain	Brain - Anterior cingulate cortex (BA24)
GTEX-11WQK-0011-R8a-SM-5BC7C	GTEX-11WQK	0.370692	Male	55	Fast Death of Natural Causes	Brain	Brain - Hypothalamus
GTEX-11WQK-0011-R9b-SM-5BC6N	GTEX-11WQK	0.361464	Male	55	Fast Death of Natural Causes	Brain	Brain - Spinal cord (cervical c-1)
GTEX-11WQK-0226-SM-5EQLI	GTEX-11WQK	0.23905	Male	55	Fast Death of Natural Causes	Heart	Heart - Atrial Appendage
GTEX-11WQK-0326-SM-5EQL1	GTEX-11WQK	0.163601	Male	55	Fast Death of Natural Causes	Blood Vessel	Artery - Aorta
GTEX-11WQK-0526-SM-5EQLD	GTEX-11WQK	0.423746	Male	55	Fast Death of Natural Causes	Skin	Skin - Sun Exposed (Lower leg)
GTEX-11WQK-0726-SM-5GU71	GTEX-11WQK	0.379386	Male	55	Fast Death of Natural Causes	Muscle	Muscle - Skeletal
GTEX-11WQK-1026-SM-5EQLX	GTEX-11WQK	0.42921	Male	55	Fast Death of Natural Causes	Skin	Skin - Not Sun Exposed (Suprapubic)
GTEX-11WQK-1226-SM-5GU5Z	GTEX-11WQK	0.264969	Male	55	Fast Death of Natural Causes	Lung	Lung
GTEX-11WQK-1526-SM-5EGKN	GTEX-11WQK	0.248348	Male	55	Fast Death of Natural Causes	Adipose Tissue	Adipose - Visceral (Omentum)
GTEX-11WQK-1826-SM-5EQM2	GTEX-11WQK	0.261792	Male	55	Fast Death of Natural Causes	Esophagus	Esophagus - Muscularis
GTEX-11WQK-2226-SM-5CVL7	GTEX-11WQK	0.227697	Male	55	Fast Death of Natural Causes	Esophagus	Esophagus - Gastroesophageal Junction
GTEX-11WQK-2426-SM-5GU5C	GTEX-11WQK	0.272293	Male	55	Fast Death of Natural Causes	Breast	Breast - Mammary Tissue
GTEX-11WQK-2626-SM-5EQ4K	GTEX-11WQK	0.207733	Male	55	Fast Death of Natural Causes	Stomach	Stomach
GTEX-11WQK-2726-SM-5EQMU	GTEX-11WQK	0.301835	Male	55	Fast Death of Natural Causes	Prostate	Prostate
GTEX-11WQK-2826-SM-5EQKH	GTEX-11WQK	0.508297	Male	55	Fast Death of Natural Causes	Testis	Testis
GTEX-11WQK-2926-SM-5EQKT	GTEX-11WQK	0.34846	Male	55	Fast Death of Natural Causes	Salivary Gland	Minor Salivary Gland
GTEX-11WQK-3026-SM-5EQL6	GTEX-11WQK	0.397081	Male	55	Fast Death of Natural Causes	Brain	Brain - Cortex
GTEX-11WQK-3226-SM-5EGI3	GTEX-11WQK	0.382241	Male	55	Fast Death of Natural Causes	Pituitary	Pituitary
GTEX-11XUK-0005-SM-5LU9F	GTEX-11XUK	0.541617	Female	45	Ventilator Case	Blood	Whole Blood
GTEX-11XUK-0008-SM-5S2WD	GTEX-11XUK	0.245849	Female	45	Ventilator Case	Skin	Cells - Cultured fibroblasts
GTEX-11XUK-0126-SM-5CVLK	GTEX-11XUK	0.337326	Female	45	Ventilator Case	Adrenal Gland	Adrenal Gland
GTEX-11XUK-0226-SM-5EQLW	GTEX-11XUK	0.328186	Female	45	Ventilator Case	Thyroid	Thyroid
GTEX-11XUK-0426-SM-5EQML	GTEX-11XUK	0.416167	Female	45	Ventilator Case	Spleen	Spleen
GTEX-11XUK-0626-SM-5N9ES	GTEX-11XUK	0.427669	Female	45	Ventilator Case	Pancreas	Pancreas
GTEX-11XUK-0726-SM-5EQMX	GTEX-11XUK	0.210572	Female	45	Ventilator Case	Esophagus	Esophagus - Muscularis
GTEX-11XUK-0826-SM-5GU6P	GTEX-11XUK	0.367824	Female	45	Ventilator Case	Esophagus	Esophagus - Mucosa
GTEX-11XUK-0926-SM-5EQL3	GTEX-11XUK	0.18208	Female	45	Ventilator Case	Esophagus	Esophagus - Gastroesophageal Junction
GTEX-11XUK-1326-SM-5EQM4	GTEX-11XUK	0.342948	Female	45	Ventilator Case	Vagina	Vagina
GTEX-11XUK-1426-SM-5EQMG	GTEX-11XUK	0.394649	Female	45	Ventilator Case	Small Intestine	Small Intestine - Terminal Ileum
GTEX-11XUK-1626-SM-5GU5O	GTEX-11XUK	0.144032	Female	45	Ventilator Case	Ovary	Ovary
GTEX-11XUK-1726-SM-5GU61	GTEX-11XUK	0.252727	Female	45	Ventilator Case	Adipose Tissue	Adipose - Visceral (Omentum)
GTEX-11XUK-2026-SM-5EQLF	GTEX-11XUK	0.300408	Female	45	Ventilator Case	Skin	Skin - Sun Exposed (Lower leg)
GTEX-11XUK-2126-SM-5EQLR	GTEX-11XUK	0.22064	Female	45	Ventilator Case	Adipose Tissue	Adipose - Subcutaneous
GTEX-11XUK-2226-SM-5CVLL	GTEX-11XUK	0.388965	Female	45	Ventilator Case	Muscle	Muscle - Skeletal
GTEX-11XUK-2326-SM-5CVLM	GTEX-11XUK	0.190998	Female	45	Ventilator Case	Nerve	Nerve - Tibial
GTEX-11XUK-2426-SM-5GU72	GTEX-11XUK	0.153713	Female	45	Ventilator Case	Blood Vessel	Artery - Tibial
GTEX-11ZTS-0005-SM-5NQ8A	GTEX-11ZTS	0.533933	Female	65	Fast Death of Natural Causes	Blood	Whole Blood
GTEX-11ZTS-0008-SM-5S2VC	GTEX-11ZTS	0.378685	Female	65	Fast Death of Natural Causes	Skin	Cells - Cultured fibroblasts
GTEX-11ZTS-0011-R10a-SM-DO93S	GTEX-11ZTS	0.480282	Female	65	Fast Death of Natural Causes	Brain	Brain - Frontal Cortex (BA9)
GTEX-11ZTS-0011-R11a-SM-DO113	GTEX-11ZTS	0.564657	Female	65	Fast Death of Natural Causes	Brain	Brain - Cerebellar Hemisphere
GTEX-11ZTS-0011-R1a-SM-5BC71	GTEX-11ZTS	0.358103	Female	65	Fast Death of Natural Causes	Brain	Brain - Hippocampus
GTEX-11ZTS-0011-R2b-SM-5BC75	GTEX-11ZTS	0.354856	Female	65	Fast Death of Natural Causes	Brain	Brain - Substantia nigra
GTEX-11ZTS-0011-R3a-SM-5BC78	GTEX-11ZTS	0.391794	Female	65	Fast Death of Natural Causes	Brain	Brain - Anterior cingulate cortex (BA24)
GTEX-11ZTS-0011-R8a-SM-57WDI	GTEX-11ZTS	0.385574	Female	65	Fast Death of Natural Causes	Brain	Brain - Hypothalamus
GTEX-11ZTS-0011-R9b-SM-DO93Q	GTEX-11ZTS	0.406192	Female	65	Fast Death of Natural Causes	Brain	Brain - Spinal cord (cervical c-1)
GTEX-11ZTS-0126-SM-5EQ6M	GTEX-11ZTS	0.288654	Female	65	Fast Death of Natural Causes	Skin	Skin - Sun Exposed (Lower leg)
GTEX-11ZTS-0226-SM-5EQKD	GTEX-11ZTS	0.120724	Female	65	Fast Death of Natural Causes	Adipose Tissue	Adipose - Subcutaneous
GTEX-11ZTS-0326-SM-5EQKP	GTEX-11ZTS	0.0334968	Female	65	Fast Death of Natural Causes	Blood Vessel	Artery - Tibial
GTEX-11ZTS-0526-SM-5CVL9	GTEX-11ZTS	0.394328	Female	65	Fast Death of Natural Causes	Muscle	Muscle - Skeletal
GTEX-11ZTS-0826-SM-5EQ49	GTEX-11ZTS	0.052344	Female	65	Fast Death of Natural Causes	Blood Vessel	Artery - Aorta
GTEX-11ZTS-1026-SM-5LU8O	GTEX-11ZTS	0.0426943	Female	65	Fast Death of Natural Causes	Blood Vessel	Artery - Coronary
GTEX-11ZTS-1126-SM-5LU9X	GTEX-11ZTS	0.113174	Female	65	Fast Death of Natural Causes	Thyroid	Thyroid
GTEX-11ZTS-1226-SM-5EQMQ	GTEX-11ZTS	0.076734	Female	65	Fast Death of Natural Causes	Lung	Lung
GTEX-11ZTS-1326-SM-5EQMA	GTEX-11ZTS	0.0650393	Female	65	Fast Death of Natural Causes	Adipose Tissue	Adipose - Visceral (Omentum)
GTEX-11ZTS-1426-SM-5EQMM	GTEX-11ZTS	0.349353	Female	65	Fast Death of Natural Causes	Liver	Liver
GTEX-11ZTS-1526-SM-5N9G7	GTEX-11ZTS	0.093355	Female	65	Fast Death of Natural Causes	Colon	Colon - Sigmoid
GTEX-11ZTS-1926-SM-5CVLA	GTEX-11ZTS	0.144255	Female	65	Fast Death of Natural Causes	Ovary	Ovary
GTEX-11ZTS-2326-SM-5EQMY	GTEX-11ZTS	0.0677413	Female	65	Fast Death of Natural Causes	Uterus	Uterus
GTEX-11ZTS-2626-SM-5EGIC	GTEX-11ZTS	0.401786	Female	65	Fast Death of Natural Causes	Esophagus	Esophagus - Mucosa
GTEX-11ZTS-2726-SM-5EQLU	GTEX-11ZTS	0.0523701	Female	65	Fast Death of Natural Causes	Esophagus	Esophagus - Gastroesophageal Junction
GTEX-11ZTS-3026-SM-5EQM7	GTEX-11ZTS	0.348346	Female	65	Fast Death of Natural Causes	Salivary Gland	Minor Salivary Gland
GTEX-11ZTS-3226-SM-5EGID	GTEX-11ZTS	0.527856	Female	65	Fast Death of Natural Causes	Brain	Brain - Cerebellum
GTEX-11ZTS-3326-SM-5LU9Y	GTEX-11ZTS	0.210823	Female	65	Fast Death of Natural Causes	Pituitary	Pituitary
GTEX-11ZTT-0002-SM-5S2PA	GTEX-11ZTT	0.923819	Female	65	Ventilator Case	Blood	Cells - EBV-transformed lymphocytes
GTEX-11ZTT-0006-SM-5N9FX	GTEX-11ZTT	0.500555	Female	65	Ventilator Case	Blood	Whole Blood
GTEX-11ZTT-0008-SM-5S2TZ	GTEX-11ZTT	0.196347	Female	65	Ventilator Case	Skin	Cells - Cultured fibroblasts
GTEX-11ZTT-0426-SM-5EQLK	GTEX-11ZTT	0.117565	Female	65	Ventilator Case	Blood Vessel	Artery - Coronary
GTEX-11ZTT-0526-SM-5EQLA	GTEX-11ZTT	0.192996	Female	65	Ventilator Case	Heart	Heart - Atrial Appendage
GTEX-11ZTT-0626-SM-5EQLM	GTEX-11ZTT	0.106924	Female	65	Ventilator Case	Lung	Lung
GTEX-11ZTT-0926-SM-5EQMS	GTEX-11ZTT	0.170737	Female	65	Ventilator Case	Esophagus	Esophagus - Muscularis
GTEX-11ZTT-1026-SM-5EQKF	GTEX-11ZTT	0.273931	Female	65	Ventilator Case	Thyroid	Thyroid
GTEX-11ZTT-1626-SM-5EQKR	GTEX-11ZTT	0.186962	Female	65	Ventilator Case	Colon	Colon - Sigmoid
GTEX-11ZTT-1726-SM-5EQL4	GTEX-11ZTT	0.122524	Female	65	Ventilator Case	Uterus	Uterus
GTEX-11ZTT-1826-SM-5CVLN	GTEX-11ZTT	0.189638	Female	65	Ventilator Case	Ovary	Ovary
GTEX-11ZTT-2126-SM-5CVLO	GTEX-11ZTT	0.302255	Female	65	Ventilator Case	Skin	Skin - Not Sun Exposed (Suprapubic)
GTEX-11ZTT-2226-SM-5CVLP	GTEX-11ZTT	0.252694	Female	65	Ventilator Case	Salivary Gland	Minor Salivary Gland
GTEX-11ZTT-2326-SM-5EQLG	GTEX-11ZTT	0.239134	Female	65	Ventilator Case	Breast	Breast - Mammary Tissue
GTEX-11ZTT-2426-SM-5EQLS	GTEX-11ZTT	0.25256	Female	65	Ventilator Case	Skin	Skin - Sun Exposed (Lower leg)
GTEX-11ZTT-2526-SM-5EQM9	GTEX-11ZTT	0.195911	Female	65	Ventilator Case	Adipose Tissue	Adipose - Subcutaneous
GTEX-11ZTT-2626-SM-5EQKK	GTEX-11ZTT	0.418295	Female	65	Ventilator Case	Muscle	Muscle - Skeletal
GTEX-11ZU8-0005-SM-5PNU5	GTEX-11ZU8	0.504091	Male	65	Slow Death	Blood	Whole Blood
GTEX-11ZU8-0008-SM-5S2VO	GTEX-11ZU8	0.301573	Male	65	Slow Death	Skin	Cells - Cultured fibroblasts
GTEX-11ZU8-0011-R4a-SM-5BC6Y	GTEX-11ZU8	0.433139	Male	65	Slow Death	Brain	Brain - Amygdala
GTEX-11ZU8-0126-SM-5EQ58	GTEX-11ZU8	0.372665	Male	65	Slow Death	Skin	Skin - Not Sun Exposed (Suprapubic)
GTEX-11ZU8-1126-SM-5EQ5K	GTEX-11ZU8	0.107362	Male	65	Slow Death	Colon	Colon - Sigmoid
GTEX-11ZU8-1526-SM-5EGHX	GTEX-11ZU8	0.438895	Male	65	Slow Death	Esophagus	Esophagus - Mucosa
GTEX-11ZU8-2326-SM-5EQMJ	GTEX-11ZU8	0.349787	Male	65	Slow Death	Muscle	Muscle - Skeletal
GTEX-11ZU8-2426-SM-5EQMV	GTEX-11ZU8	0.161253	Male	65	Slow Death	Adipose Tissue	Adipose - Subcutaneous
GTEX-11ZU8-2526-SM-5EQKI	GTEX-11ZU8	0.282996	Male	65	Slow Death	Skin	Skin - Sun Exposed (Lower leg)
GTEX-11ZU8-2626-SM-5EQLL	GTEX-11ZU8	0.142873	Male	65	Slow Death	Nerve	Nerve - Tibial
GTEX-11ZUS-0006-SM-5O9AJ	GTEX-11ZUS	0.495006	Male	35	Violent and Fast Death	Blood	Whole Blood
GTEX-11ZUS-0008-SM-5S2UO	GTEX-11ZUS	0.314714	Male	35	Violent and Fast Death	Skin	Cells - Cultured fibroblasts
GTEX-11ZUS-0011-R11b-SM-5BC7B	GTEX-11ZUS	0.596111	Male	35	Violent and Fast Death	Brain	Brain - Cerebellar Hemisphere
GTEX-11ZUS-0011-R8a-SM-5BC73	GTEX-11ZUS	0.54751	Male	35	Violent and Fast Death	Brain	Brain - Hypothalamus
GTEX-11ZUS-0011-R9b-SM-5BC76	GTEX-11ZUS	0.43077	Male	35	Violent and Fast Death	Brain	Brain - Spinal cord (cervical c-1)
GTEX-11ZUS-0126-SM-5EQM5	GTEX-11ZUS	0.0151622	Male	35	Violent and Fast Death	Lung	Lung
GTEX-11ZUS-0226-SM-5FQT8	GTEX-11ZUS	0.268063	Male	35	Violent and Fast Death	Heart	Heart - Left Ventricle
GTEX-11ZUS-0326-SM-5EQ4W	GTEX-11ZUS	0.112649	Male	35	Violent and Fast Death	Heart	Heart - Atrial Appendage
GTEX-11ZUS-0526-SM-59884	GTEX-11ZUS	0.0429344	Male	35	Violent and Fast Death	Blood Vessel	Artery - Coronary
GTEX-11ZUS-0626-SM-59885	GTEX-11ZUS	0.178315	Male	35	Violent and Fast Death	Skin	Skin - Sun Exposed (Lower leg)
GTEX-11ZUS-0726-SM-59886	GTEX-11ZUS	0.114714	Male	35	Violent and Fast Death	Adipose Tissue	Adipose - Subcutaneous
GTEX-11ZUS-0826-SM-5FQUY	GTEX-11ZUS	0.136327	Male	35	Violent and Fast Death	Breast	Breast - Mammary Tissue
GTEX-11ZUS-0926-SM-5FQSY	GTEX-11ZUS	0.0670819	Male	35	Violent and Fast Death	Esophagus	Esophagus - Muscularis
GTEX-11ZUS-1226-SM-5FQU8	GTEX-11ZUS	0.0728546	Male	35	Violent and Fast Death	Nerve	Nerve - Tibial
GTEX-11ZUS-1326-SM-5FQUC	GTEX-11ZUS	0.106774	Male	35	Violent and Fast Death	Blood Vessel	Artery - Tibial
GTEX-11ZUS-1426-SM-5FQSP	GTEX-11ZUS	0.412043	Male	35	Violent and Fast Death	Muscle	Muscle - Skeletal
GTEX-11ZUS-1826-SM-5FQTR	GTEX-11ZUS	0.0672328	Male	35	Violent and Fast Death	Adipose Tissue	Adipose - Visceral (Omentum)
GTEX-11ZUS-2126-SM-5N9E6	GTEX-11ZUS	0.131505	Male	35	Violent and Fast Death	Prostate	Prostate
GTEX-11ZUS-2526-SM-59872	GTEX-11ZUS	0.413616	Male	35	Violent and Fast Death	Liver	Liver
GTEX-11ZUS-2626-SM-5FQUR	GTEX-11ZUS	0.376819	Male	35	Violent and Fast Death	Skin	Skin - Not Sun Exposed (Suprapubic)
GTEX-11ZUS-2726-SM-5FQUA	GTEX-11ZUS	0.606717	Male	35	Violent and Fast Death	Testis	Testis
GTEX-11ZUS-2826-SM-5EQKW	GTEX-11ZUS	0.55553	Male	35	Violent and Fast Death	Brain	Brain - Cerebellum
GTEX-11ZUS-2926-SM-5FQSL	GTEX-11ZUS	0.51655	Male	35	Violent and Fast Death	Brain	Brain - Cortex
GTEX-11ZUS-3026-SM-5EGI4	GTEX-11ZUS	0.336404	Male	35	Violent and Fast Death	Pituitary	Pituitary
GTEX-11ZVC-0006-SM-5N9GA	GTEX-11ZVC	0.510473	Female	55	Fast Death of Natural Causes	Blood	Whole Blood
GTEX-11ZVC-0011-R1b-SM-5BC6M	GTEX-11ZVC	0.306596	Female	55	Fast Death of Natural Causes	Brain	Brain - Hippocampus
GTEX-11ZVC-0011-R3a-SM-5BC6V	GTEX-11ZVC	0.374935	Female	55	Fast Death of Natural Causes	Brain	Brain - Anterior cingulate cortex (BA24)
GTEX-11ZVC-0011-R4a-SM-5BC6Z	GTEX-11ZVC	0.333027	Female	55	Fast Death of Natural Causes	Brain	Brain - Amygdala
GTEX-11ZVC-0011-R9a-SM-57WC5	GTEX-11ZVC	0.384038	Female	55	Fast Death of Natural Causes	Brain	Brain - Spinal cord (cervical c-1)
GTEX-11ZVC-0126-SM-5986G	GTEX-11ZVC	0.143616	Female	55	Fast Death of Natural Causes	Thyroid	Thyroid
GTEX-11ZVC-0226-SM-731E8	GTEX-11ZVC	0.0957229	Female	55	Fast Death of Natural Causes	Lung	Lung
GTEX-11ZVC-0326-SM-5CVLC	GTEX-11ZVC	0.0491278	Female	55	Fast Death of Natural Causes	Blood Vessel	Artery - Aorta
GTEX-11ZVC-0426-SM-5CVLD	GTEX-11ZVC	0.207184	Female	55	Fast Death of Natural Causes	Heart	Heart - Left Ventricle
GTEX-11ZVC-0526-SM-5N9G1	GTEX-11ZVC	0.0630889	Female	55	Fast Death of Natural Causes	Heart	Heart - Atrial Appendage
GTEX-11ZVC-0726-SM-5FQT9	GTEX-11ZVC	0.369037	Female	55	Fast Death of Natural Causes	Liver	Liver
GTEX-11ZVC-1426-SM-5EGGA	GTEX-11ZVC	0.169412	Female	55	Fast Death of Natural Causes	Ovary	Ovary
GTEX-11ZVC-2126-SM-5EGJ1	GTEX-11ZVC	0.158684	Female	55	Fast Death of Natural Causes	Colon	Colon - Transverse
GTEX-11ZVC-2526-SM-5FQTE	GTEX-11ZVC	0.230002	Female	55	Fast Death of Natural Causes	Skin	Skin - Sun Exposed (Lower leg)
GTEX-11ZVC-2626-SM-5FQTA	GTEX-11ZVC	0.117615	Female	55	Fast Death of Natural Causes	Adipose Tissue	Adipose - Subcutaneous
GTEX-11ZVC-2726-SM-5FQSZ	GTEX-11ZVC	0.31755	Female	55	Fast Death of Natural Causes	Muscle	Muscle - Skeletal
GTEX-11ZVC-2826-SM-5FQTC	GTEX-11ZVC	0.0890021	Female	55	Fast Death of Natural Causes	Nerve	Nerve - Tibial
GTEX-11ZVC-2926-SM-5986H	GTEX-11ZVC	0.0698935	Female	55	Fast Death of Natural Causes	Blood Vessel	Artery - Tibial
GTEX-11ZVC-3026-SM-59HJM	GTEX-11ZVC	0.53306	Female	55	Fast Death of Natural Causes	Brain	Brain - Cerebellum
GTEX-11ZVC-3226-SM-5FQV1	GTEX-11ZVC	0.345066	Female	55	Fast Death of Natural Causes	Pituitary	Pituitary
GTEX-1211K-0001-SM-5S2P9	GTEX-1211K	0.862029	Female	65	Ventilator Case	Blood	Cells - EBV-transformed lymphocytes
GTEX-1211K-0006-SM-5MR53	GTEX-1211K	0.491395	Female	65	Ventilator Case	Blood	Whole Blood
GTEX-1211K-0008-SM-5S2W1	GTEX-1211K	0.211435	Female	65	Ventilator Case	Skin	Cells - Cultured fibroblasts
GTEX-1211K-0126-SM-59HJE	GTEX-1211K	0.358074	Female	65	Ventilator Case	Adrenal Gland	Adrenal Gland
GTEX-1211K-0226-SM-59HJY	GTEX-1211K	0.22258	Female	65	Ventilator Case	Heart	Heart - Atrial Appendage
GTEX-1211K-0326-SM-5FQT1	GTEX-1211K	0.111384	Female	65	Ventilator Case	Blood Vessel	Artery - Aorta
GTEX-1211K-0426-SM-5FQTP	GTEX-1211K	0.346249	Female	65	Ventilator Case	Spleen	Spleen
GTEX-1211K-0626-SM-5FQUZ	GTEX-1211K	0.266208	Female	65	Ventilator Case	Heart	Heart - Left Ventricle
GTEX-1211K-0726-SM-5FQUW	GTEX-1211K	0.272553	Female	65	Ventilator Case	Thyroid	Thyroid
GTEX-1211K-0826-SM-5FQUP	GTEX-1211K	0.242341	Female	65	Ventilator Case	Lung	Lung
GTEX-1211K-0926-SM-5FQTL	GTEX-1211K	0.42947	Female	65	Ventilator Case	Esophagus	Esophagus - Mucosa
GTEX-1211K-1026-SM-5EQ4B	GTEX-1211K	0.200569	Female	65	Ventilator Case	Esophagus	Esophagus - Muscularis
GTEX-1211K-1126-SM-5EGGB	GTEX-1211K	0.405873	Female	65	Ventilator Case	Pancreas	Pancreas
GTEX-1211K-1226-SM-5EQ4N	GTEX-1211K	0.22209	Female	65	Ventilator Case	Adipose Tissue	Adipose - Visceral (Omentum)
GTEX-1211K-1326-SM-5FQV2	GTEX-1211K	0.18117	Female	65	Ventilator Case	Esophagus	Esophagus - Gastroesophageal Junction
GTEX-1211K-1426-SM-5FQTF	GTEX-1211K	0.128519	Female	65	Ventilator Case	Stomach	Stomach
GTEX-1211K-1526-SM-5FQU4	GTEX-1211K	0.254341	Female	65	Ventilator Case	Skin	Skin - Not Sun Exposed (Suprapubic)
GTEX-1211K-1726-SM-5FQUJ	GTEX-1211K	0.349809	Female	65	Ventilator Case	Colon	Colon - Transverse
GTEX-1211K-1826-SM-5EGJ2	GTEX-1211K	0.169295	Female	65	Ventilator Case	Colon	Colon - Sigmoid
GTEX-1211K-1926-SM-5EQLB	GTEX-1211K	0.236768	Female	65	Ventilator Case	Breast	Breast - Mammary Tissue
GTEX-1211K-2026-SM-5EQ4Z	GTEX-1211K	0.30531	Female	65	Ventilator Case	Skin	Skin - Sun Exposed (Lower leg)
GTEX-1211K-2126-SM-59HJZ	GTEX-1211K	0.407821	Female	65	Ventilator Case	Muscle	Muscle - Skeletal
GTEX-1211K-2226-SM-5FQU6	GTEX-1211K	0.170775	Female	65	Ventilator Case	Adipose Tissue	Adipose - Subcutaneous
GTEX-1211K-2326-SM-5FQU7	GTEX-1211K	0.159197	Female	65	Ventilator Case	Nerve	Nerve - Tibial
GTEX-1211K-2426-SM-59HL8	GTEX-1211K	0.149032	Female	65	Ventilator Case	Blood Vessel	Artery - Tibial
GTEX-12126-0006-SM-5O9B8	GTEX-12126	0.49825	Male	25	Violent and Fast Death	Blood	Whole Blood
GTEX-12126-0008-SM-5S2UC	GTEX-12126	0.28339	Male	25	Violent and Fast Death	Skin	Cells - Cultured fibroblasts
GTEX-12126-0011-R10b-SM-5BC6T	GTEX-12126	0.503167	Male	25	Violent and Fast Death	Brain	Brain - Frontal Cortex (BA9)
GTEX-12126-0011-R11a-SM-5BC6X	GTEX-12126	0.555136	Male	25	Violent and Fast Death	Brain	Brain - Cerebellar Hemisphere
GTEX-12126-0011-R9b-SM-5BC6P	GTEX-12126	0.383712	Male	25	Violent and Fast Death	Brain	Brain - Spinal cord (cervical c-1)
GTEX-12126-0326-SM-5PNW3	GTEX-12126	0.339815	Male	25	Violent and Fast Death	Skin	Skin - Sun Exposed (Lower leg)
GTEX-12126-0426-SM-5Q5AP	GTEX-12126	0.137018	Male	25	Violent and Fast Death	Adipose Tissue	Adipose - Subcutaneous
GTEX-12126-0526-SM-5PNW4	GTEX-12126	0.420106	Male	25	Violent and Fast Death	Muscle	Muscle - Skeletal
GTEX-12126-0626-SM-5Q5AQ	GTEX-12126	0.0752949	Male	25	Violent and Fast Death	Nerve	Nerve - Tibial
GTEX-12126-0726-SM-5FQTX	GTEX-12126	0.128836	Male	25	Violent and Fast Death	Blood Vessel	Artery - Tibial
GTEX-12126-0826-SM-5FQTZ	GTEX-12126	0.313038	Male	25	Violent and Fast Death	Skin	Skin - Not Sun Exposed (Suprapubic)
GTEX-12126-0926-SM-5FQTW	GTEX-12126	0.531406	Male	25	Violent and Fast Death	Brain	Brain - Cerebellum
GTEX-12126-1026-SM-5P9JJ	GTEX-12126	0.474894	Male	25	Violent and Fast Death	Brain	Brain - Cortex
GTEX-12126-1126-SM-5P9GP	GTEX-12126	0.283273	Male	25	Violent and Fast Death	Pituitary	Pituitary
GTEX-1212Z-0002-SM-5SI6W	GTEX-1212Z	0.96301	Male	65	Fast Death of Natural Causes	Blood	Cells - EBV-transformed lymphocytes
GTEX-1212Z-0006-SM-5NQ8M	GTEX-1212Z	0.503698	Male	65	Fast Death of Natural Causes	Blood	Whole Blood
GTEX-1212Z-0008-SM-5TDBW	GTEX-1212Z	0.351705	Male	65	Fast Death of Natural Causes	Skin	Cells - Cultured fibroblasts
GTEX-1212Z-0011-R1b-SM-5BC72	GTEX-1212Z	0.302565	Male	65	Fast Death of Natural Causes	Brain	Brain - Hippocampus
GTEX-1212Z-0126-SM-59HK4	GTEX-1212Z	0.309635	Male	65	Fast Death of Natural Causes	Skin	Skin - Not Sun Exposed (Suprapubic)
GTEX-1212Z-0226-SM-59HLF	GTEX-1212Z	0.355225	Male	65	Fast Death of Natural Causes	Liver	Liver
GTEX-1212Z-0326-SM-5FQSJ	GTEX-1212Z	0.560867	Male	65	Fast Death of Natural Causes	Testis	Testis
GTEX-1212Z-0426-SM-5FQT6	GTEX-1212Z	0.183246	Male	65	Fast Death of Natural Causes	Thyroid	Thyroid
GTEX-1212Z-0526-SM-5FQSQ	GTEX-1212Z	0.101798	Male	65	Fast Death of Natural Causes	Adipose Tissue	Adipose - Visceral (Omentum)
GTEX-1212Z-0626-SM-5FQTB	GTEX-1212Z	0.109761	Male	65	Fast Death of Natural Causes	Heart	Heart - Left Ventricle
GTEX-1212Z-0726-SM-5EGI5	GTEX-1212Z	0.132584	Male	65	Fast Death of Natural Causes	Heart	Heart - Atrial Appendage
GTEX-1212Z-0826-SM-5EQ51	GTEX-1212Z	0.0615952	Male	65	Fast Death of Natural Causes	Blood Vessel	Artery - Aorta
GTEX-1212Z-1026-SM-5EGJ8	GTEX-1212Z	0.0814097	Male	65	Fast Death of Natural Causes	Lung	Lung
GTEX-1212Z-1826-SM-5FQSH	GTEX-1212Z	0.122201	Male	65	Fast Death of Natural Causes	Colon	Colon - Sigmoid
GTEX-1212Z-2026-SM-5N9EA	GTEX-1212Z	0.133883	Male	65	Fast Death of Natural Causes	Esophagus	Esophagus - Muscularis
GTEX-1212Z-2126-SM-5FQTM	GTEX-1212Z	0.352113	Male	65	Fast Death of Natural Causes	Esophagus	Esophagus - Mucosa
GTEX-1212Z-2426-SM-5EQ5D	GTEX-1212Z	0.113398	Male	65	Fast Death of Natural Causes	Adipose Tissue	Adipose - Subcutaneous
GTEX-1212Z-2526-SM-5EGKP	GTEX-1212Z	0.384821	Male	65	Fast Death of Natural Causes	Skin	Skin - Sun Exposed (Lower leg)
GTEX-1212Z-2626-SM-5YY8P	GTEX-1212Z	0.386778	Male	65	Fast Death of Natural Causes	Muscle	Muscle - Skeletal
GTEX-1212Z-2726-SM-5EQ59	GTEX-1212Z	0.110206	Male	65	Fast Death of Natural Causes	Nerve	Nerve - Tibial
GTEX-1212Z-2826-SM-59HJ5	GTEX-1212Z	0.0988227	Male	65	Fast Death of Natural Causes	Blood Vessel	Artery - Tibial
GTEX-1212Z-2926-SM-59HKV	GTEX-1212Z	0.292175	Male	65	Fast Death of Natural Causes	Pituitary	Pituitary
GTEX-12584-0005-SM-5N9GM	GTEX-12584	0.576231	Male	45	Intermediate Death	Blood	Whole Blood
GTEX-12584-0008-SM-664MB	GTEX-12584	0.142351	Male	45	Intermediate Death	Skin	Cells - Cultured fibroblasts
GTEX-12584-0011-R6a-SM-5NQ7C	GTEX-12584	0.373822	Male	45	Intermediate Death	Brain	Brain - Nucleus accumbens (basal ganglia)
GTEX-12584-0126-SM-5EGKQ	GTEX-12584	0.27532	Male	45	Intermediate Death	Skin	Skin - Sun Exposed (Lower leg)
GTEX-12584-0226-SM-5EQL5	GTEX-12584	0.178679	Male	45	Intermediate Death	Adipose Tissue	Adipose - Subcutaneous
GTEX-12584-0326-SM-59HK2	GTEX-12584	0.131256	Male	45	Intermediate Death	Nerve	Nerve - Tibial
GTEX-12584-0426-SM-5FQTT	GTEX-12584	0.113433	Male	45	Intermediate Death	Blood Vessel	Artery - Tibial
GTEX-12584-0526-SM-5FQTS	GTEX-12584	0.353984	Male	45	Intermediate Death	Muscle	Muscle - Skeletal
GTEX-12584-0726-SM-5FQTK	GTEX-12584	0.236944	Male	45	Intermediate Death	Skin	Skin - Not Sun Exposed (Suprapubic)
GTEX-12584-0826-SM-5FQSK	GTEX-12584	0.205438	Male	45	Intermediate Death	Thyroid	Thyroid
GTEX-12584-0926-SM-5FQTN	GTEX-12584	0.174527	Male	45	Intermediate Death	Heart	Heart - Left Ventricle
GTEX-12584-1026-SM-59HK3	GTEX-12584	0.0160413	Male	45	Intermediate Death	Heart	Heart - Atrial Appendage
GTEX-12584-1426-SM-5EGJ9	GTEX-12584	0.118241	Male	45	Intermediate Death	Lung	Lung
GTEX-12584-2126-SM-5FQUM	GTEX-12584	0.204563	Male	45	Intermediate Death	Adipose Tissue	Adipose - Visceral (Omentum)
GTEX-12584-3126-SM-5EGKR	GTEX-12584	0.296627	Male	45	Intermediate Death	Pituitary	Pituitary
GTEX-12696-0002-SM-5SI6U	GTEX-12696	0.933744	Male	65	Intermediate Death	Blood	Cells - EBV-transformed lymphocytes
GTEX-12696-0005-SM-5LZYS	GTEX-12696	0.501961	Male	65	Intermediate Death	Blood	Whole Blood
GTEX-12696-0008-SM-5TDBX	GTEX-12696	0.423367	Male	65	Intermediate Death	Skin	Cells - Cultured fibroblasts
GTEX-12696-0126-SM-5EQ4L	GTEX-12696	0.344302	Male	65	Intermediate Death	Skin	Skin - Not Sun Exposed (Suprapubic)
GTEX-12696-0226-SM-5EGL3	GTEX-12696	0.544754	Male	65	Intermediate Death	Testis	Testis
GTEX-12696-0326-SM-5EGL4	GTEX-12696	0.264474	Male	65	Intermediate Death	Thyroid	Thyroid
GTEX-12696-0426-SM-5EGL5	GTEX-12696	0.108626	Male	65	Intermediate Death	Blood Vessel	Artery - Aorta
GTEX-12696-0526-SM-5EQ3Z	GTEX-12696	0.0974659	Male	65	Intermediate Death	Blood Vessel	Artery - Coronary
GTEX-12696-0626-SM-5EGGD	GTEX-12696	0.311425	Male	65	Intermediate Death	Adrenal Gland	Adrenal Gland
GTEX-12696-0826-SM-5EGGE	GTEX-12696	0.449322	Male	65	Intermediate Death	Liver	Liver
GTEX-12696-0926-SM-5FQTV	GTEX-12696	0.25503	Male	65	Intermediate Death	Kidney	Kidney - Cortex
GTEX-12696-1026-SM-5FQUV	GTEX-12696	0.117963	Male	65	Intermediate Death	Lung	Lung
GTEX-12696-1126-SM-5FQTI	GTEX-12696	0.251498	Male	65	Intermediate Death	Heart	Heart - Left Ventricle
GTEX-12696-1226-SM-5FQSM	GTEX-12696	0.216273	Male	65	Intermediate Death	Heart	Heart - Atrial Appendage
GTEX-12696-1326-SM-5FQTJ	GTEX-12696	0.413238	Male	65	Intermediate Death	Esophagus	Esophagus - Mucosa
GTEX-12696-1426-SM-5EGJ6	GTEX-12696	0.165471	Male	65	Intermediate Death	Esophagus	Esophagus - Muscularis
GTEX-12696-1526-SM-5EGL6	GTEX-12696	0.151241	Male	65	Intermediate Death	Esophagus	Esophagus - Gastroesophageal Junction
GTEX-12696-1726-SM-5EQLH	GTEX-12696	0.397806	Male	65	Intermediate Death	Stomach	Stomach
GTEX-12696-1826-SM-5EGJS	GTEX-12696	0.234967	Male	65	Intermediate Death	Adipose Tissue	Adipose - Visceral (Omentum)
GTEX-12696-1926-SM-5EGJT	GTEX-12696	0.160047	Male	65	Intermediate Death	Colon	Colon - Sigmoid
GTEX-12696-2226-SM-5EQ65	GTEX-12696	0.196496	Male	65	Intermediate Death	Prostate	Prostate
GTEX-12696-2426-SM-5EQ6H	GTEX-12696	0.368958	Male	65	Intermediate Death	Skin	Skin - Sun Exposed (Lower leg)
GTEX-12696-2526-SM-5EQLN	GTEX-12696	0.200193	Male	65	Intermediate Death	Adipose Tissue	Adipose - Subcutaneous
GTEX-12696-2626-SM-5EQ44	GTEX-12696	0.147495	Male	65	Intermediate Death	Nerve	Nerve - Tibial
GTEX-12696-2726-SM-5FQUL	GTEX-12696	0.103385	Male	65	Intermediate Death	Blood Vessel	Artery - Tibial
GTEX-12696-2826-SM-5FQTY	GTEX-12696	0.375995	Male	65	Intermediate Death	Muscle	Muscle - Skeletal
GTEX-12696-3126-SM-5FQUX	GTEX-12696	0.319024	Male	65	Intermediate Death	Pituitary	Pituitary
GTEX-1269C-0003-SM-5S2PB	GTEX-1269C	0.921966	Female	65	Fast Death of Natural Causes	Blood	Cells - EBV-transformed lymphocytes
GTEX-1269C-0005-SM-5N9CJ	GTEX-1269C	0.488503	Female	65	Fast Death of Natural Causes	Blood	Whole Blood
GTEX-1269C-0008-SM-5TDBY	GTEX-1269C	0.4221	Female	65	Fast Death of Natural Causes	Skin	Cells - Cultured fibroblasts
GTEX-1269C-0126-SM-5EQ5L	GTEX-1269C	0.357987	Female	65	Fast Death of Natural Causes	Skin	Skin - Not Sun Exposed (Suprapubic)
GTEX-1269C-0226-SM-5EGKS	GTEX-1269C	0.136758	Female	65	Fast Death of Natural Causes	Thyroid	Thyroid
GTEX-1269C-0626-SM-5FQSS	GTEX-1269C	0.364495	Female	65	Fast Death of Natural Causes	Liver	Liver
GTEX-1269C-0826-SM-5N9EM	GTEX-1269C	0.160838	Female	65	Fast Death of Natural Causes	Heart	Heart - Left Ventricle
GTEX-1269C-0926-SM-5FQSR	GTEX-1269C	0.0936925	Female	65	Fast Death of Natural Causes	Lung	Lung
GTEX-1269C-1026-SM-5N9EY	GTEX-1269C	0.244406	Female	65	Fast Death of Natural Causes	Esophagus	Esophagus - Mucosa
GTEX-1269C-1826-SM-5N9E1	GTEX-1269C	0.171652	Female	65	Fast Death of Natural Causes	Ovary	Ovary
GTEX-1269C-2426-SM-5FQSN	GTEX-1269C	0.157604	Female	65	Fast Death of Natural Causes	Breast	Breast - Mammary Tissue
GTEX-1269C-2526-SM-5EGJ3	GTEX-1269C	0.302101	Female	65	Fast Death of Natural Causes	Skin	Skin - Sun Exposed (Lower leg)
GTEX-1269C-2626-SM-5EQ5C	GTEX-1269C	0.390399	Female	65	Fast Death of Natural Causes	Muscle	Muscle - Skeletal
GTEX-1269C-2726-SM-5EGJ4	GTEX-1269C	0.111611	Female	65	Fast Death of Natural Causes	Adipose Tissue	Adipose - Subcutaneous
GTEX-1269C-2826-SM-5EQ5O	GTEX-1269C	0.0634041	Female	65	Fast Death of Natural Causes	Blood Vessel	Artery - Tibial
GTEX-1269C-3126-SM-5EGI6	GTEX-1269C	0.425696	Female	65	Fast Death of Natural Causes	Brain	Brain - Cerebellum
GTEX-1269C-3226-SM-5EGKT	GTEX-1269C	0.221662	Female	65	Fast Death of Natural Causes	Pituitary	Pituitary
GTEX-12BJ1-0003-SM-5SI6V	GTEX-12BJ1	0.91994	Male	65	Ventilator Case	Blood	Cells - EBV-transformed lymphocytes
GTEX-12BJ1-0006-SM-5SIB5	GTEX-12BJ1	0.492588	Male	65	Ventilator Case	Blood	Whole Blood
GTEX-12BJ1-0008-SM-5TDBZ	GTEX-12BJ1	0.404342	Male	65	Ventilator Case	Skin	Cells - Cultured fibroblasts
GTEX-12BJ1-0226-SM-5LUA2	GTEX-12BJ1	0.280781	Male	65	Ventilator Case	Heart	Heart - Left Ventricle
GTEX-12BJ1-0326-SM-5FQUB	GTEX-12BJ1	0.225056	Male	65	Ventilator Case	Heart	Heart - Atrial Appendage
GTEX-12BJ1-0426-SM-5FQSO	GTEX-12BJ1	0.235428	Male	65	Ventilator Case	Thyroid	Thyroid
GTEX-12BJ1-0526-SM-5FQUD	GTEX-12BJ1	0.311251	Male	65	Ventilator Case	Adrenal Gland	Adrenal Gland
GTEX-12BJ1-0726-SM-5EGGF	GTEX-12BJ1	0.349153	Male	65	Ventilator Case	Spleen	Spleen
GTEX-12BJ1-0826-SM-5EQ5P	GTEX-12BJ1	0.257136	Male	65	Ventilator Case	Adipose Tissue	Adipose - Visceral (Omentum)
GTEX-12BJ1-0926-SM-5EQ62	GTEX-12BJ1	0.261603	Male	65	Ventilator Case	Skin	Skin - Not Sun Exposed (Suprapubic)
GTEX-12BJ1-1026-SM-5EGJA	GTEX-12BJ1	0.219636	Male	65	Ventilator Case	Lung	Lung
GTEX-12BJ1-1126-SM-5EGGG	GTEX-12BJ1	0.380075	Male	65	Ventilator Case	Pancreas	Pancreas
GTEX-12BJ1-1226-SM-5LUAE	GTEX-12BJ1	0.142491	Male	65	Ventilator Case	Prostate	Prostate
GTEX-12BJ1-1326-SM-5BC5P	GTEX-12BJ1	0.553347	Male	65	Ventilator Case	Testis	Testis
GTEX-12BJ1-1426-SM-5BC5Q	GTEX-12BJ1	0.224539	Male	65	Ventilator Case	Esophagus	Esophagus - Muscularis
GTEX-12BJ1-1526-SM-5LUAQ	GTEX-12BJ1	0.154535	Male	65	Ventilator Case	Esophagus	Esophagus - Gastroesophageal Junction
GTEX-12BJ1-1626-SM-5HL8Y	GTEX-12BJ1	0.391732	Male	65	Ventilator Case	Esophagus	Esophagus - Mucosa
GTEX-12BJ1-1726-SM-5HL9B	GTEX-12BJ1	0.415164	Male	65	Ventilator Case	Stomach	Stomach
GTEX-12BJ1-1826-SM-5HL9N	GTEX-12BJ1	0.207612	Male	65	Ventilator Case	Breast	Breast - Mammary Tissue
GTEX-12BJ1-1926-SM-5HL9Z	GTEX-12BJ1	0.372314	Male	65	Ventilator Case	Small Intestine	Small Intestine - Terminal Ileum
GTEX-12BJ1-2026-SM-5FQUH	GTEX-12BJ1	0.215591	Male	65	Ventilator Case	Colon	Colon - Sigmoid
GTEX-12BJ1-2126-SM-5BC5O	GTEX-12BJ1	0.412642	Male	65	Ventilator Case	Colon	Colon - Transverse
GTEX-12BJ1-2226-SM-5BC6G	GTEX-12BJ1	0.418628	Male	65	Ventilator Case	Salivary Gland	Minor Salivary Gland
GTEX-12BJ1-2526-SM-5FQUE	GTEX-12BJ1	0.415631	Male	65	Ventilator Case	Muscle	Muscle - Skeletal
GTEX-12BJ1-2626-SM-5FQUF	GTEX-12BJ1	0.130113	Male	65	Ventilator Case	Nerve	Nerve - Tibial
GTEX-12BJ1-2726-SM-5HL9M	GTEX-12BJ1	0.120294	Male	65	Ventilator Case	Blood Vessel	Artery - Tibial
GTEX-12C56-0002-SM-5S2PC	GTEX-12C56	0.904514	Male	25	Ventilator Case	Blood	Cells - EBV-transformed lymphocytes
GTEX-12C56-0006-SM-5N9E9	GTEX-12C56	0.522896	Male	25	Ventilator Case	Blood	Whole Blood
GTEX-12C56-0008-SM-5TDC1	GTEX-12C56	0.513711	Male	25	Ventilator Case	Skin	Cells - Cultured fibroblasts
GTEX-12C56-0226-SM-5N9FB	GTEX-12C56	0.114522	Male	25	Ventilator Case	Blood Vessel	Artery - Aorta
GTEX-12C56-0426-SM-5FQU1	GTEX-12C56	0.191836	Male	25	Ventilator Case	Esophagus	Esophagus - Gastroesophageal Junction
GTEX-12C56-0526-SM-5FQST	GTEX-12C56	0.148994	Male	25	Ventilator Case	Stomach	Stomach
GTEX-12C56-0626-SM-5EGGC	GTEX-12C56	0.392533	Male	25	Ventilator Case	Colon	Colon - Transverse
GTEX-12C56-0826-SM-5EGJ5	GTEX-12C56	0.235741	Male	25	Ventilator Case	Adipose Tissue	Adipose - Visceral (Omentum)
GTEX-12C56-1126-SM-5FQTO	GTEX-12C56	0.1769	Male	25	Ventilator Case	Esophagus	Esophagus - Muscularis
GTEX-12C56-1226-SM-5FQSU	GTEX-12C56	0.437026	Male	25	Ventilator Case	Esophagus	Esophagus - Mucosa
GTEX-12C56-1326-SM-5FQSV	GTEX-12C56	0.237372	Male	25	Ventilator Case	Prostate	Prostate
GTEX-12C56-1426-SM-5FQSW	GTEX-12C56	0.551971	Male	25	Ventilator Case	Testis	Testis
GTEX-12C56-1526-SM-5FQUQ	GTEX-12C56	0.277648	Male	25	Ventilator Case	Skin	Skin - Not Sun Exposed (Suprapubic)
GTEX-12C56-1626-SM-5FQUO	GTEX-12C56	0.25432	Male	25	Ventilator Case	Adipose Tissue	Adipose - Subcutaneous
GTEX-12C56-1726-SM-5EQ61	GTEX-12C56	0.256359	Male	25	Ventilator Case	Skin	Skin - Sun Exposed (Lower leg)
GTEX-12C56-1826-SM-5EQ6D	GTEX-12C56	0.140168	Male	25	Ventilator Case	Nerve	Nerve - Tibial
GTEX-12C56-1926-SM-5FQUG	GTEX-12C56	0.373107	Male	25	Ventilator Case	Muscle	Muscle - Skeletal
GTEX-12C56-2026-SM-5FQSI	GTEX-12C56	0.156642	Male	25	Ventilator Case	Blood Vessel	Artery - Tibial
GTEX-12KS4-0005-SM-5SI94	GTEX-12KS4	0.535587	Male	35	Ventilator Case	Blood	Whole Blood
GTEX-12KS4-0008-SM-664MC	GTEX-12KS4	0.205025	Male	35	Ventilator Case	Skin	Cells - Cultured fibroblasts
GTEX-12KS4-0126-SM-5Q5A5	GTEX-12KS4	0.150247	Male	35	Ventilator Case	Breast	Breast - Mammary Tissue
GTEX-12KS4-0326-SM-5EQ41	GTEX-12KS4	0.278391	Male	35	Ventilator Case	Skin	Skin - Sun Exposed (Lower leg)
GTEX-12KS4-0426-SM-5EQMC	GTEX-12KS4	0.138915	Male	35	Ventilator Case	Adipose Tissue	Adipose - Subcutaneous
GTEX-12KS4-0626-SM-5PNY4	GTEX-12KS4	0.07542	Male	35	Ventilator Case	Blood Vessel	Artery - Aorta
GTEX-12KS4-0726-SM-5FQSX	GTEX-12KS4	0.198701	Male	35	Ventilator Case	Lung	Lung
GTEX-12KS4-0826-SM-5BC5R	GTEX-12KS4	0.385227	Male	35	Ventilator Case	Muscle	Muscle - Skeletal
GTEX-12KS4-0926-SM-5BC5S	GTEX-12KS4	0.35896	Male	35	Ventilator Case	Esophagus	Esophagus - Mucosa
GTEX-12KS4-1026-SM-5FQTD	GTEX-12KS4	0.161741	Male	35	Ventilator Case	Esophagus	Esophagus - Muscularis
GTEX-12KS4-1126-SM-5FQUI	GTEX-12KS4	0.0995732	Male	35	Ventilator Case	Nerve	Nerve - Tibial
GTEX-12KS4-1326-SM-5LUB3	GTEX-12KS4	0.360067	Male	35	Ventilator Case	Liver	Liver
GTEX-12KS4-1526-SM-5EQ6E	GTEX-12KS4	0.150549	Male	35	Ventilator Case	Adipose Tissue	Adipose - Visceral (Omentum)
GTEX-12KS4-2126-SM-5FQUT	GTEX-12KS4	0.330358	Male	35	Ventilator Case	Skin	Skin - Not Sun Exposed (Suprapubic)
GTEX-12KS4-2326-SM-5EGJB	GTEX-12KS4	0.0911709	Male	35	Ventilator Case	Colon	Colon - Sigmoid
GTEX-12KS4-2426-SM-5LU8P	GTEX-12KS4	0.170871	Male	35	Ventilator Case	Colon	Colon - Transverse
GTEX-12WSA-0008-SM-5TDC3	GTEX-12WSA	0.403732	Male	65	Slow Death	Skin	Cells - Cultured fibroblasts
GTEX-12WSA-0011-R10b-SM-5P9ET	GTEX-12WSA	0.397314	Male	65	Slow Death	Brain	Brain - Frontal Cortex (BA9)
GTEX-12WSA-0011-R2a-SM-57WDK	GTEX-12WSA	0.377864	Male	65	Slow Death	Brain	Brain - Substantia nigra
GTEX-12WSA-0011-R4a-SM-57WB7	GTEX-12WSA	0.389523	Male	65	Slow Death	Brain	Brain - Amygdala
GTEX-12WSA-0011-R5b-SM-5GU5I	GTEX-12WSA	0.45241	Male	65	Slow Death	Brain	Brain - Caudate (basal ganglia)
GTEX-12WSA-0011-R7b-SM-5GU5U	GTEX-12WSA	0.442358	Male	65	Slow Death	Brain	Brain - Putamen (basal ganglia)
GTEX-12WSA-0011-R8a-SM-5P9EX	GTEX-12WSA	0.446441	Male	65	Slow Death	Brain	Brain - Hypothalamus
GTEX-12WSA-0226-SM-5BC5V	GTEX-12WSA	0.368835	Male	65	Slow Death	Skin	Skin - Sun Exposed (Lower leg)
GTEX-12WSA-0326-SM-5BC6I	GTEX-12WSA	0.169573	Male	65	Slow Death	Adipose Tissue	Adipose - Subcutaneous
GTEX-12WSA-0426-SM-5EQ5X	GTEX-12WSA	0.307913	Male	65	Slow Death	Skin	Skin - Not Sun Exposed (Suprapubic)
GTEX-12WSA-0726-SM-5FQU2	GTEX-12WSA	0.397886	Male	65	Slow Death	Muscle	Muscle - Skeletal
GTEX-12WSA-1026-SM-5EGHN	GTEX-12WSA	0.121424	Male	65	Slow Death	Lung	Lung
GTEX-12WSA-1126-SM-5EGKU	GTEX-12WSA	0.150599	Male	65	Slow Death	Heart	Heart - Atrial Appendage
GTEX-12WSA-1426-SM-5EGJU	GTEX-12WSA	0.387759	Male	65	Slow Death	Esophagus	Esophagus - Mucosa
GTEX-12WSA-1626-SM-5EGJV	GTEX-12WSA	0.168328	Male	65	Slow Death	Adipose Tissue	Adipose - Visceral (Omentum)
GTEX-12WSA-2926-SM-5EQ4D	GTEX-12WSA	0.369592	Male	65	Slow Death	Brain	Brain - Cortex
GTEX-12WSC-0005-SM-5MR3H	GTEX-12WSC	0.534586	Male	55	Fast Death of Natural Causes	Blood	Whole Blood
GTEX-12WSC-0008-SM-664MK	GTEX-12WSC	0.259384	Male	55	Fast Death of Natural Causes	Skin	Cells - Cultured fibroblasts
GTEX-12WSC-0011-R10a-SM-5GU57	GTEX-12WSC	0.554681	Male	55	Fast Death of Natural Causes	Brain	Brain - Frontal Cortex (BA9)
GTEX-12WSC-0011-R11a-SM-5GU5J	GTEX-12WSC	0.612801	Male	55	Fast Death of Natural Causes	Brain	Brain - Cerebellar Hemisphere
GTEX-12WSC-0011-R3a-SM-5P9F1	GTEX-12WSC	0.534014	Male	55	Fast Death of Natural Causes	Brain	Brain - Anterior cingulate cortex (BA24)
GTEX-12WSC-0011-R5b-SM-5CVNS	GTEX-12WSC	0.495794	Male	55	Fast Death of Natural Causes	Brain	Brain - Caudate (basal ganglia)
GTEX-12WSC-0011-R6b-SM-5LU99	GTEX-12WSC	0.51026	Male	55	Fast Death of Natural Causes	Brain	Brain - Nucleus accumbens (basal ganglia)
GTEX-12WSC-0011-R7b-SM-5LU9L	GTEX-12WSC	0.472605	Male	55	Fast Death of Natural Causes	Brain	Brain - Putamen (basal ganglia)
GTEX-12WSC-0011-R9a-SM-5GU4U	GTEX-12WSC	0.306521	Male	55	Fast Death of Natural Causes	Brain	Brain - Spinal cord (cervical c-1)
GTEX-12WSC-0126-SM-5EQ4P	GTEX-12WSC	0.34922	Male	55	Fast Death of Natural Causes	Skin	Skin - Sun Exposed (Lower leg)
GTEX-12WSC-0226-SM-5EQ52	GTEX-12WSC	0.115077	Male	55	Fast Death of Natural Causes	Adipose Tissue	Adipose - Subcutaneous
GTEX-12WSC-0326-SM-5EQ5E	GTEX-12WSC	0.347125	Male	55	Fast Death of Natural Causes	Muscle	Muscle - Skeletal
GTEX-12WSC-0526-SM-5BC5X	GTEX-12WSC	0.0821	Male	55	Fast Death of Natural Causes	Blood Vessel	Artery - Tibial
GTEX-12WSC-0826-SM-5EQ5Q	GTEX-12WSC	0.119232	Male	55	Fast Death of Natural Causes	Thyroid	Thyroid
GTEX-12WSC-0926-SM-5EQ63	GTEX-12WSC	0.0819959	Male	55	Fast Death of Natural Causes	Blood Vessel	Artery - Coronary
GTEX-12WSC-1026-SM-5EQ5Y	GTEX-12WSC	0.140026	Male	55	Fast Death of Natural Causes	Heart	Heart - Atrial Appendage
GTEX-12WSC-1126-SM-5EQ4G	GTEX-12WSC	0.184829	Male	55	Fast Death of Natural Causes	Heart	Heart - Left Ventricle
GTEX-12WSC-1726-SM-5GCN3	GTEX-12WSC	0.0898589	Male	55	Fast Death of Natural Causes	Adipose Tissue	Adipose - Visceral (Omentum)
GTEX-12WSC-2826-SM-5BC5Y	GTEX-12WSC	0.282431	Male	55	Fast Death of Natural Causes	Skin	Skin - Not Sun Exposed (Suprapubic)
GTEX-12WSC-2926-SM-5BC5Z	GTEX-12WSC	0.579185	Male	55	Fast Death of Natural Causes	Brain	Brain - Cerebellum
GTEX-12WSC-3026-SM-5GCNF	GTEX-12WSC	0.503068	Male	55	Fast Death of Natural Causes	Brain	Brain - Cortex
GTEX-12WSC-3126-SM-5GCNB	GTEX-12WSC	0.205324	Male	55	Fast Death of Natural Causes	Pituitary	Pituitary
GTEX-12WSD-0005-SM-5N9FZ	GTEX-12WSD	0.513782	Female	65	Fast Death of Natural Causes	Blood	Whole Blood
GTEX-12WSD-0008-SM-664ME	GTEX-12WSD	0.454803	Female	65	Fast Death of Natural Causes	Skin	Cells - Cultured fibroblasts
GTEX-12WSD-0011-R11a-SM-9OSVC	GTEX-12WSD	0.57118	Female	65	Fast Death of Natural Causes	Brain	Brain - Cerebellar Hemisphere
GTEX-12WSD-0011-R1b-SM-5LZVY	GTEX-12WSD	0.440508	Female	65	Fast Death of Natural Causes	Brain	Brain - Hippocampus
GTEX-12WSD-0011-R2a-SM-5LZWB	GTEX-12WSD	0.359937	Female	65	Fast Death of Natural Causes	Brain	Brain - Substantia nigra
GTEX-12WSD-0011-R3b-SM-5LZWN	GTEX-12WSD	0.417126	Female	65	Fast Death of Natural Causes	Brain	Brain - Anterior cingulate cortex (BA24)
GTEX-12WSD-0011-R4b-SM-5LZUA	GTEX-12WSD	0.415944	Female	65	Fast Death of Natural Causes	Brain	Brain - Amygdala
GTEX-12WSD-0011-R5b-SM-5CVNG	GTEX-12WSD	0.39062	Female	65	Fast Death of Natural Causes	Brain	Brain - Caudate (basal ganglia)
GTEX-12WSD-0011-R6b-SM-5P9JU	GTEX-12WSD	0.42287	Female	65	Fast Death of Natural Causes	Brain	Brain - Nucleus accumbens (basal ganglia)
GTEX-12WSD-0011-R7b-SM-5PNWE	GTEX-12WSD	0.430527	Female	65	Fast Death of Natural Causes	Brain	Brain - Putamen (basal ganglia)
GTEX-12WSD-0011-R9a-SM-5GU6W	GTEX-12WSD	0.39645	Female	65	Fast Death of Natural Causes	Brain	Brain - Spinal cord (cervical c-1)
GTEX-12WSD-0126-SM-59HKN	GTEX-12WSD	0.224917	Female	65	Fast Death of Natural Causes	Skin	Skin - Sun Exposed (Lower leg)
GTEX-12WSD-0226-SM-59HKO	GTEX-12WSD	0.0940849	Female	65	Fast Death of Natural Causes	Adipose Tissue	Adipose - Subcutaneous
GTEX-12WSD-0326-SM-59HKP	GTEX-12WSD	0.10284	Female	65	Fast Death of Natural Causes	Nerve	Nerve - Tibial
GTEX-12WSD-0526-SM-5EQ6F	GTEX-12WSD	0.361863	Female	65	Fast Death of Natural Causes	Muscle	Muscle - Skeletal
GTEX-12WSD-0626-SM-5GCMW	GTEX-12WSD	0.329934	Female	65	Fast Death of Natural Causes	Skin	Skin - Not Sun Exposed (Suprapubic)
GTEX-12WSD-0826-SM-5GCNE	GTEX-12WSD	0.128199	Female	65	Fast Death of Natural Causes	Lung	Lung
GTEX-12WSD-0926-SM-5GCNL	GTEX-12WSD	0.142446	Female	65	Fast Death of Natural Causes	Thyroid	Thyroid
GTEX-12WSD-1026-SM-5EQ42	GTEX-12WSD	0.0651777	Female	65	Fast Death of Natural Causes	Blood Vessel	Artery - Coronary
GTEX-12WSD-1126-SM-5EGJD	GTEX-12WSD	0.214692	Female	65	Fast Death of Natural Causes	Heart	Heart - Left Ventricle
GTEX-12WSD-1226-SM-5HL9Q	GTEX-12WSD	0.151889	Female	65	Fast Death of Natural Causes	Heart	Heart - Atrial Appendage
GTEX-12WSD-1326-SM-5GCNU	GTEX-12WSD	0.0726461	Female	65	Fast Death of Natural Causes	Blood Vessel	Artery - Aorta
GTEX-12WSD-1426-SM-5GCN9	GTEX-12WSD	0.340745	Female	65	Fast Death of Natural Causes	Liver	Liver
GTEX-12WSD-1626-SM-5GCNR	GTEX-12WSD	0.354539	Female	65	Fast Death of Natural Causes	Pancreas	Pancreas
GTEX-12WSD-1726-SM-5GCN4	GTEX-12WSD	0.323021	Female	65	Fast Death of Natural Causes	Spleen	Spleen
GTEX-12WSD-1826-SM-5GCOA	GTEX-12WSD	0.374243	Female	65	Fast Death of Natural Causes	Esophagus	Esophagus - Mucosa
GTEX-12WSD-1926-SM-5GCOV	GTEX-12WSD	0.103048	Female	65	Fast Death of Natural Causes	Esophagus	Esophagus - Muscularis
GTEX-12WSD-2026-SM-5HL7D	GTEX-12WSD	0.0660999	Female	65	Fast Death of Natural Causes	Esophagus	Esophagus - Gastroesophageal Junction
GTEX-12WSD-2126-SM-5LZWK	GTEX-12WSD	0.272017	Female	65	Fast Death of Natural Causes	Adrenal Gland	Adrenal Gland
GTEX-12WSD-2326-SM-59HKQ	GTEX-12WSD	0.195113	Female	65	Fast Death of Natural Causes	Stomach	Stomach
GTEX-12WSD-2626-SM-5EGJE	GTEX-12WSD	0.0836403	Female	65	Fast Death of Natural Causes	Colon	Colon - Sigmoid
GTEX-12WSD-2726-SM-59HLR	GTEX-12WSD	0.168946	Female	65	Fast Death of Natural Causes	Ovary	Ovary
GTEX-12WSD-2826-SM-59HKT	GTEX-12WSD	0.0844356	Female	65	Fast Death of Natural Causes	Uterus	Uterus
GTEX-12WSD-2926-SM-5LZUH	GTEX-12WSD	0.0382637	Female	65	Fast Death of Natural Causes	Vagina	Vagina
GTEX-12WSD-3026-SM-5LZU7	GTEX-12WSD	0.52256	Female	65	Fast Death of Natural Causes	Brain	Brain - Cerebellum
GTEX-12WSD-3126-SM-5HL7P	GTEX-12WSD	0.40368	Female	65	Fast Death of Natural Causes	Brain	Brain - Cortex
GTEX-12WSD-3226-SM-5HL9G	GTEX-12WSD	0.338931	Female	65	Fast Death of Natural Causes	Pituitary	Pituitary
GTEX-12WSE-0005-SM-5NQAE	GTEX-12WSE	0.536692	Male	25	Fast Death of Natural Causes	Blood	Whole Blood
GTEX-12WSE-0008-SM-5YY9P	GTEX-12WSE	0.477868	Male	25	Fast Death of Natural Causes	Skin	Cells - Cultured fibroblasts
GTEX-12WSE-0011-R10b-SM-5P9JV	GTEX-12WSE	0.570743	Male	25	Fast Death of Natural Causes	Brain	Brain - Frontal Cortex (BA9)
GTEX-12WSE-0011-R11b-SM-5P9JW	GTEX-12WSE	0.594705	Male	25	Fast Death of Natural Causes	Brain	Brain - Cerebellar Hemisphere
GTEX-12WSE-0011-R1b-SM-5GU4V	GTEX-12WSE	0.4909	Male	25	Fast Death of Natural Causes	Brain	Brain - Hippocampus
GTEX-12WSE-0011-R6b-SM-5LZV5	GTEX-12WSE	0.462115	Male	25	Fast Death of Natural Causes	Brain	Brain - Nucleus accumbens (basal ganglia)
GTEX-12WSE-0011-R7a-SM-5PNWF	GTEX-12WSE	0.343075	Male	25	Fast Death of Natural Causes	Brain	Brain - Putamen (basal ganglia)
GTEX-12WSE-0526-SM-793B2	GTEX-12WSE	0.439308	Male	25	Fast Death of Natural Causes	Skin	Skin - Sun Exposed (Lower leg)
GTEX-12WSE-0826-SM-5S2VL	GTEX-12WSE	0.0658569	Male	25	Fast Death of Natural Causes	Lung	Lung
GTEX-12WSE-0926-SM-5S2VX	GTEX-12WSE	0.153528	Male	25	Fast Death of Natural Causes	Heart	Heart - Atrial Appendage
GTEX-12WSE-1126-SM-7DUEH	GTEX-12WSE	0.12464	Male	25	Fast Death of Natural Causes	Blood Vessel	Artery - Coronary
GTEX-12WSE-1226-SM-73KUF	GTEX-12WSE	0.13182	Male	25	Fast Death of Natural Causes	Thyroid	Thyroid
GTEX-12WSE-2926-SM-5RQJ9	GTEX-12WSE	0.589287	Male	25	Fast Death of Natural Causes	Brain	Brain - Cerebellum
GTEX-12WSE-3126-SM-5YY9F	GTEX-12WSE	0.219224	Male	25	Fast Death of Natural Causes	Pituitary	Pituitary
GTEX-12WSF-0005-SM-5NQAQ	GTEX-12WSF	0.485485	Male	75	Slow Death	Blood	Whole Blood
GTEX-12WSF-0008-SM-5YY8S	GTEX-12WSF	0.210582	Male	75	Slow Death	Skin	Cells - Cultured fibroblasts
GTEX-12WSF-0011-R10a-SM-5LZVH	GTEX-12WSF	0.513315	Male	75	Slow Death	Brain	Brain - Frontal Cortex (BA9)
GTEX-12WSF-0011-R11a-SM-5LZVT	GTEX-12WSF	0.574353	Male	75	Slow Death	Brain	Brain - Cerebellar Hemisphere
GTEX-12WSF-0011-R1a-SM-5DUVI	GTEX-12WSF	0.475981	Male	75	Slow Death	Brain	Brain - Hippocampus
GTEX-12WSF-0011-R2a-SM-5DUVU	GTEX-12WSF	0.378542	Male	75	Slow Death	Brain	Brain - Substantia nigra
GTEX-12WSF-0011-R3a-SM-5DUW7	GTEX-12WSF	0.441522	Male	75	Slow Death	Brain	Brain - Anterior cingulate cortex (BA24)
GTEX-12WSF-0011-R4b-SM-5HL88	GTEX-12WSF	0.397892	Male	75	Slow Death	Brain	Brain - Amygdala
GTEX-12WSF-0011-R5a-SM-5HL8K	GTEX-12WSF	0.412105	Male	75	Slow Death	Brain	Brain - Caudate (basal ganglia)
GTEX-12WSF-0011-R6b-SM-5HL8W	GTEX-12WSF	0.468359	Male	75	Slow Death	Brain	Brain - Nucleus accumbens (basal ganglia)
GTEX-12WSF-0011-R7b-SM-5HL99	GTEX-12WSF	0.406671	Male	75	Slow Death	Brain	Brain - Putamen (basal ganglia)
GTEX-12WSF-0426-SM-7KUMT	GTEX-12WSF	0.101824	Male	75	Slow Death	Nerve	Nerve - Tibial
GTEX-12WSF-0926-SM-6PALU	GTEX-12WSF	0.378722	Male	75	Slow Death	Muscle	Muscle - Skeletal
GTEX-12WSF-1526-SM-6PAN6	GTEX-12WSF	0.148029	Male	75	Slow Death	Adipose Tissue	Adipose - Visceral (Omentum)
GTEX-12WSF-1626-SM-7KUG5	GTEX-12WSF	0.251371	Male	75	Slow Death	Skin	Skin - Not Sun Exposed (Suprapubic)
GTEX-12WSF-3026-SM-6LPIU	GTEX-12WSF	0.306638	Male	75	Slow Death	Pituitary	Pituitary
GTEX-12WSF-3126-SM-6M478	GTEX-12WSF	0.492976	Male	75	Slow Death	Brain	Brain - Cortex
GTEX-12WSG-0005-SM-5NQA2	GTEX-12WSG	0.524033	Female	55	Ventilator Case	Blood	Whole Blood
GTEX-12WSG-0008-SM-5TDC4	GTEX-12WSG	0.250125	Female	55	Ventilator Case	Skin	Cells - Cultured fibroblasts
GTEX-12WSG-0226-SM-5EGIF	GTEX-12WSG	0.195167	Female	55	Ventilator Case	Thyroid	Thyroid
GTEX-12WSG-0426-SM-5FQSE	GTEX-12WSG	0.126346	Female	55	Ventilator Case	Adipose Tissue	Adipose - Visceral (Omentum)
GTEX-12WSG-0526-SM-5FQTH	GTEX-12WSG	0.282097	Female	55	Ventilator Case	Heart	Heart - Left Ventricle
GTEX-12WSG-0626-SM-5FQTQ	GTEX-12WSG	0.420983	Female	55	Ventilator Case	Liver	Liver
GTEX-12WSG-0726-SM-5EGIG	GTEX-12WSG	0.273966	Female	55	Ventilator Case	Adrenal Gland	Adrenal Gland
GTEX-12WSG-0826-SM-5EQ5A	GTEX-12WSG	0.282921	Female	55	Ventilator Case	Kidney	Kidney - Cortex
GTEX-12WSG-0926-SM-5EGIH	GTEX-12WSG	0.325173	Female	55	Ventilator Case	Spleen	Spleen
GTEX-12WSG-1026-SM-5EGII	GTEX-12WSG	0.411849	Female	55	Ventilator Case	Pancreas	Pancreas
GTEX-12WSG-1226-SM-5EQ4C	GTEX-12WSG	0.186691	Female	55	Ventilator Case	Heart	Heart - Atrial Appendage
GTEX-12WSG-1426-SM-5FQUK	GTEX-12WSG	0.180828	Female	55	Ventilator Case	Ovary	Ovary
GTEX-12WSG-2026-SM-5FQUU	GTEX-12WSG	0.33613	Female	55	Ventilator Case	Stomach	Stomach
GTEX-12WSG-2126-SM-5EGJ7	GTEX-12WSG	0.10849	Female	55	Ventilator Case	Uterus	Uterus
GTEX-12WSG-2426-SM-5EQLZ	GTEX-12WSG	0.119009	Female	55	Ventilator Case	Colon	Colon - Sigmoid
GTEX-12WSG-2726-SM-5EQ5M	GTEX-12WSG	0.141217	Female	55	Ventilator Case	Nerve	Nerve - Tibial
GTEX-12WSG-2826-SM-E9J4H	GTEX-12WSG	0.283607	Female	55	Ventilator Case	Skin	Skin - Sun Exposed (Lower leg)
GTEX-12WSG-5004-SM-7EPG9	GTEX-12WSG	0.213877	Female	55	Ventilator Case	Lung	Lung
GTEX-12WSG-5007-SM-7DUGZ	GTEX-12WSG	0.353813	Female	55	Ventilator Case	Esophagus	Esophagus - Mucosa
GTEX-12WSG-5016-SM-7SB84	GTEX-12WSG	0.396936	Female	55	Ventilator Case	Muscle	Muscle - Skeletal
GTEX-12WSH-0005-SM-5NQ9P	GTEX-12WSH	0.498315	Male	55	Fast Death of Natural Causes	Blood	Whole Blood
GTEX-12WSH-0008-SM-5S2V1	GTEX-12WSH	0.245838	Male	55	Fast Death of Natural Causes	Skin	Cells - Cultured fibroblasts
GTEX-12WSH-0011-R10a-SM-5LZUS	GTEX-12WSH	0.511597	Male	55	Fast Death of Natural Causes	Brain	Brain - Frontal Cortex (BA9)
GTEX-12WSH-0011-R11a-SM-5LZVM	GTEX-12WSH	0.598475	Male	55	Fast Death of Natural Causes	Brain	Brain - Cerebellar Hemisphere
GTEX-12WSH-0011-R1a-SM-5GU5V	GTEX-12WSH	0.47531	Male	55	Fast Death of Natural Causes	Brain	Brain - Hippocampus
GTEX-12WSH-0011-R2a-SM-5GU68	GTEX-12WSH	0.373735	Male	55	Fast Death of Natural Causes	Brain	Brain - Substantia nigra
GTEX-12WSH-0011-R4a-SM-5GU6K	GTEX-12WSH	0.448001	Male	55	Fast Death of Natural Causes	Brain	Brain - Amygdala
GTEX-12WSH-0011-R5b-SM-5P9F3	GTEX-12WSH	0.422447	Male	55	Fast Death of Natural Causes	Brain	Brain - Caudate (basal ganglia)
GTEX-12WSH-0011-R6b-SM-5P9F4	GTEX-12WSH	0.519135	Male	55	Fast Death of Natural Causes	Brain	Brain - Nucleus accumbens (basal ganglia)
GTEX-12WSH-0011-R9b-SM-5LZUG	GTEX-12WSH	0.348534	Male	55	Fast Death of Natural Causes	Brain	Brain - Spinal cord (cervical c-1)
GTEX-12WSH-0126-SM-5GCO3	GTEX-12WSH	0.139033	Male	55	Fast Death of Natural Causes	Lung	Lung
GTEX-12WSH-0226-SM-5GCOG	GTEX-12WSH	0.188356	Male	55	Fast Death of Natural Causes	Thyroid	Thyroid
GTEX-12WSH-0326-SM-5GCNH	GTEX-12WSH	0.541077	Male	55	Fast Death of Natural Causes	Testis	Testis
GTEX-12WSH-1526-SM-5BC5W	GTEX-12WSH	0.333563	Male	55	Fast Death of Natural Causes	Skin	Skin - Not Sun Exposed (Suprapubic)
GTEX-12WSH-2526-SM-5CVNH	GTEX-12WSH	0.422169	Male	55	Fast Death of Natural Causes	Muscle	Muscle - Skeletal
GTEX-12WSH-2826-SM-5GCP5	GTEX-12WSH	0.135968	Male	55	Fast Death of Natural Causes	Blood Vessel	Artery - Tibial
GTEX-12WSH-2926-SM-5GCMR	GTEX-12WSH	0.190619	Male	55	Fast Death of Natural Causes	Pituitary	Pituitary
GTEX-12WSH-3026-SM-5CVNI	GTEX-12WSH	0.48906	Male	55	Fast Death of Natural Causes	Brain	Brain - Cortex
GTEX-12WSH-3126-SM-5LZW8	GTEX-12WSH	0.571106	Male	55	Fast Death of Natural Causes	Brain	Brain - Cerebellum
GTEX-12WSI-0005-SM-5O99K	GTEX-12WSI	0.52676	Male	55	Fast Death of Natural Causes	Blood	Whole Blood
GTEX-12WSI-0008-SM-664MD	GTEX-12WSI	0.499862	Male	55	Fast Death of Natural Causes	Skin	Cells - Cultured fibroblasts
GTEX-12WSI-0011-R11b-SM-5P9EZ	GTEX-12WSI	0.606037	Male	55	Fast Death of Natural Causes	Brain	Brain - Cerebellar Hemisphere
GTEX-12WSI-0011-R7b-SM-5GU78	GTEX-12WSI	0.505204	Male	55	Fast Death of Natural Causes	Brain	Brain - Putamen (basal ganglia)
GTEX-12WSI-0226-SM-5GCNA	GTEX-12WSI	0.287092	Male	55	Fast Death of Natural Causes	Liver	Liver
GTEX-12WSI-0426-SM-5EQ5J	GTEX-12WSI	0.142747	Male	55	Fast Death of Natural Causes	Heart	Heart - Atrial Appendage
GTEX-12WSI-0826-SM-5EGKD	GTEX-12WSI	0.12568	Male	55	Fast Death of Natural Causes	Lung	Lung
GTEX-12WSI-1526-SM-5GCNM	GTEX-12WSI	0.136054	Male	55	Fast Death of Natural Causes	Adipose Tissue	Adipose - Visceral (Omentum)
GTEX-12WSI-2126-SM-5GCMV	GTEX-12WSI	0.534959	Male	55	Fast Death of Natural Causes	Testis	Testis
GTEX-12WSJ-0002-SM-5TDBV	GTEX-12WSJ	0.933462	Female	45	Ventilator Case	Blood	Cells - EBV-transformed lymphocytes
GTEX-12WSJ-0005-SM-5LU8S	GTEX-12WSJ	0.514982	Female	45	Ventilator Case	Blood	Whole Blood
GTEX-12WSJ-0008-SM-664ML	GTEX-12WSJ	0.27446	Female	45	Ventilator Case	Skin	Cells - Cultured fibroblasts
GTEX-12WSJ-0126-SM-5GCOM	GTEX-12WSJ	0.293406	Female	45	Ventilator Case	Adrenal Gland	Adrenal Gland
GTEX-12WSJ-0226-SM-5GCP7	GTEX-12WSJ	0.310001	Female	45	Ventilator Case	Lung	Lung
GTEX-12WSJ-0326-SM-5GCMT	GTEX-12WSJ	0.31045	Female	45	Ventilator Case	Thyroid	Thyroid
GTEX-12WSJ-0526-SM-5GCOZ	GTEX-12WSJ	0.357252	Female	45	Ventilator Case	Spleen	Spleen
GTEX-12WSJ-0726-SM-5GCN6	GTEX-12WSJ	0.193327	Female	45	Ventilator Case	Esophagus	Esophagus - Muscularis
GTEX-12WSJ-0826-SM-5PNWV	GTEX-12WSJ	0.256483	Female	45	Ventilator Case	Esophagus	Esophagus - Gastroesophageal Junction
GTEX-12WSJ-0926-SM-5P9JD	GTEX-12WSJ	0.194177	Female	45	Ventilator Case	Stomach	Stomach
GTEX-12WSJ-1126-SM-5LZVJ	GTEX-12WSJ	0.374791	Female	45	Ventilator Case	Skin	Skin - Not Sun Exposed (Suprapubic)
GTEX-12WSJ-1226-SM-5LU91	GTEX-12WSJ	0.264203	Female	45	Ventilator Case	Ovary	Ovary
GTEX-12WSJ-1326-SM-5GCOB	GTEX-12WSJ	0.0988737	Female	45	Ventilator Case	Vagina	Vagina
GTEX-12WSJ-1426-SM-5GCON	GTEX-12WSJ	0.225028	Female	45	Ventilator Case	Colon	Colon - Sigmoid
GTEX-12WSJ-1526-SM-5GCNI	GTEX-12WSJ	0.176403	Female	45	Ventilator Case	Colon	Colon - Transverse
GTEX-12WSJ-1726-SM-5LZVV	GTEX-12WSJ	0.446665	Female	45	Ventilator Case	Muscle	Muscle - Skeletal
GTEX-12WSJ-1826-SM-5GCNY	GTEX-12WSJ	0.316699	Female	45	Ventilator Case	Skin	Skin - Sun Exposed (Lower leg)
GTEX-12WSK-0006-SM-5NQA1	GTEX-12WSK	0.51024	Female	45	Ventilator Case	Blood	Whole Blood
GTEX-12WSK-0008-SM-5YY9R	GTEX-12WSK	0.267756	Female	45	Ventilator Case	Skin	Cells - Cultured fibroblasts
GTEX-12WSK-0126-SM-5GCO7	GTEX-12WSK	0.462481	Female	45	Ventilator Case	Spleen	Spleen
GTEX-12WSK-0226-SM-5BC62	GTEX-12WSK	0.356739	Female	45	Ventilator Case	Pancreas	Pancreas
GTEX-12WSK-0326-SM-5GCOJ	GTEX-12WSK	0.265502	Female	45	Ventilator Case	Adrenal Gland	Adrenal Gland
GTEX-12WSK-0426-SM-5GCNS	GTEX-12WSK	0.103828	Female	45	Ventilator Case	Blood Vessel	Artery - Aorta
GTEX-12WSK-0526-SM-5CVNA	GTEX-12WSK	0.193353	Female	45	Ventilator Case	Heart	Heart - Atrial Appendage
GTEX-12WSK-0626-SM-5LZUJ	GTEX-12WSK	0.193526	Female	45	Ventilator Case	Heart	Heart - Left Ventricle
GTEX-12WSK-0726-SM-5LZUV	GTEX-12WSK	0.119278	Female	45	Ventilator Case	Blood Vessel	Artery - Coronary
GTEX-12WSK-0826-SM-5CVNP	GTEX-12WSK	0.0782798	Female	45	Ventilator Case	Lung	Lung
GTEX-12WSK-0926-SM-5CVNQ	GTEX-12WSK	0.218135	Female	45	Ventilator Case	Thyroid	Thyroid
GTEX-12WSK-1026-SM-5CVNR	GTEX-12WSK	0.201785	Female	45	Ventilator Case	Adipose Tissue	Adipose - Visceral (Omentum)
GTEX-12WSK-1126-SM-5LZV8	GTEX-12WSK	0.368463	Female	45	Ventilator Case	Esophagus	Esophagus - Mucosa
GTEX-12WSK-1326-SM-5CVNM	GTEX-12WSK	0.150843	Female	45	Ventilator Case	Esophagus	Esophagus - Gastroesophageal Junction
GTEX-12WSK-1426-SM-5CVNN	GTEX-12WSK	0.355191	Female	45	Ventilator Case	Stomach	Stomach
GTEX-12WSK-1526-SM-5CVNO	GTEX-12WSK	0.155939	Female	45	Ventilator Case	Small Intestine	Small Intestine - Terminal Ileum
GTEX-12WSK-1926-SM-5LZVK	GTEX-12WSK	0.227167	Female	45	Ventilator Case	Ovary	Ovary
GTEX-12WSK-2026-SM-5CVNB	GTEX-12WSK	0.135277	Female	45	Ventilator Case	Uterus	Uterus
GTEX-12WSK-2126-SM-5CVNC	GTEX-12WSK	0.385895	Female	45	Ventilator Case	Skin	Skin - Not Sun Exposed (Suprapubic)
GTEX-12WSK-2226-SM-5GCO5	GTEX-12WSK	0.140782	Female	45	Ventilator Case	Breast	Breast - Mammary Tissue
GTEX-12WSK-2326-SM-5GCOH	GTEX-12WSK	0.30368	Female	45	Ventilator Case	Skin	Skin - Sun Exposed (Lower leg)
GTEX-12WSK-2626-SM-5GCOT	GTEX-12WSK	0.139805	Female	45	Ventilator Case	Nerve	Nerve - Tibial
GTEX-12WSK-2726-SM-5CVND	GTEX-12WSK	0.163296	Female	45	Ventilator Case	Blood Vessel	Artery - Tibial
GTEX-12WSL-0002-SM-664MF	GTEX-12WSL	0.935055	Male	55	Ventilator Case	Blood	Cells - EBV-transformed lymphocytes
GTEX-12WSL-0005-SM-5NQAD	GTEX-12WSL	0.500797	Male	55	Ventilator Case	Blood	Whole Blood
GTEX-12WSL-0008-SM-664MM	GTEX-12WSL	0.500886	Male	55	Ventilator Case	Skin	Cells - Cultured fibroblasts
GTEX-12WSL-0226-SM-5CVMJ	GTEX-12WSL	0.453232	Male	55	Ventilator Case	Liver	Liver
GTEX-12WSL-0326-SM-5CVMK	GTEX-12WSL	0.286423	Male	55	Ventilator Case	Adrenal Gland	Adrenal Gland
GTEX-12WSL-0426-SM-5GCNX	GTEX-12WSL	0.408927	Male	55	Ventilator Case	Pancreas	Pancreas
GTEX-12WSL-0626-SM-5GCOY	GTEX-12WSL	0.210815	Male	55	Ventilator Case	Thyroid	Thyroid
GTEX-12WSL-0926-SM-5N9EK	GTEX-12WSL	0.149261	Male	55	Ventilator Case	Blood Vessel	Artery - Coronary
GTEX-12WSL-1026-SM-5CVNJ	GTEX-12WSL	0.171885	Male	55	Ventilator Case	Lung	Lung
GTEX-12WSL-1126-SM-5CVNK	GTEX-12WSL	0.150032	Male	55	Ventilator Case	Adipose Tissue	Adipose - Visceral (Omentum)
GTEX-12WSL-1226-SM-5DUXE	GTEX-12WSL	0.16591	Male	55	Ventilator Case	Esophagus	Esophagus - Gastroesophageal Junction
GTEX-12WSL-1326-SM-5LZVW	GTEX-12WSL	0.224155	Male	55	Ventilator Case	Esophagus	Esophagus - Muscularis
GTEX-12WSL-1526-SM-5GCP8	GTEX-12WSL	0.547707	Male	55	Ventilator Case	Esophagus	Esophagus - Mucosa
GTEX-12WSL-1626-SM-5GCMU	GTEX-12WSL	0.193133	Male	55	Ventilator Case	Colon	Colon - Transverse
GTEX-12WSL-1826-SM-5LZW9	GTEX-12WSL	0.21899	Male	55	Ventilator Case	Colon	Colon - Sigmoid
GTEX-12WSL-2026-SM-5GCML	GTEX-12WSL	0.223921	Male	55	Ventilator Case	Skin	Skin - Not Sun Exposed (Suprapubic)
GTEX-12WSL-2126-SM-5GCNG	GTEX-12WSL	0.280396	Male	55	Ventilator Case	Salivary Gland	Minor Salivary Gland
GTEX-12WSL-2326-SM-5DUXQ	GTEX-12WSL	0.494614	Male	55	Ventilator Case	Testis	Testis
GTEX-12WSL-2426-SM-5GCN7	GTEX-12WSL	0.250151	Male	55	Ventilator Case	Adipose Tissue	Adipose - Subcutaneous
GTEX-12WSL-2526-SM-5GCNJ	GTEX-12WSL	0.360801	Male	55	Ventilator Case	Skin	Skin - Sun Exposed (Lower leg)
GTEX-12WSL-2626-SM-5GCNV	GTEX-12WSL	0.118736	Male	55	Ventilator Case	Blood Vessel	Artery - Tibial
GTEX-12WSL-2726-SM-5CVNL	GTEX-12WSL	0.371834	Male	55	Ventilator Case	Muscle	Muscle - Skeletal
GTEX-12WSL-2826-SM-5LZWL	GTEX-12WSL	0.169983	Male	55	Ventilator Case	Nerve	Nerve - Tibial
GTEX-12WSM-0005-SM-5NQB3	GTEX-12WSM	0.462356	Male	65	Fast Death of Natural Causes	Blood	Whole Blood
GTEX-12WSM-0008-SM-5S2VD	GTEX-12WSM	0.204317	Male	65	Fast Death of Natural Causes	Skin	Cells - Cultured fibroblasts
GTEX-12WSM-0011-R10a-SM-5DUWV	GTEX-12WSM	0.51867	Male	65	Fast Death of Natural Causes	Brain	Brain - Frontal Cortex (BA9)
GTEX-12WSM-0011-R11a-SM-5DUX8	GTEX-12WSM	0.571329	Male	65	Fast Death of Natural Causes	Brain	Brain - Cerebellar Hemisphere
GTEX-12WSM-0011-R1a-SM-5LZW6	GTEX-12WSM	0.438933	Male	65	Fast Death of Natural Causes	Brain	Brain - Hippocampus
GTEX-12WSM-0011-R3b-SM-5LZWI	GTEX-12WSM	0.499554	Male	65	Fast Death of Natural Causes	Brain	Brain - Anterior cingulate cortex (BA24)
GTEX-12WSM-0011-R5a-SM-5EQ4Y	GTEX-12WSM	0.492302	Male	65	Fast Death of Natural Causes	Brain	Brain - Caudate (basal ganglia)
GTEX-12WSM-0011-R6b-SM-5EQ6N	GTEX-12WSM	0.455929	Male	65	Fast Death of Natural Causes	Brain	Brain - Nucleus accumbens (basal ganglia)
GTEX-12WSM-0011-R7b-SM-5EGLD	GTEX-12WSM	0.434874	Male	65	Fast Death of Natural Causes	Brain	Brain - Putamen (basal ganglia)
GTEX-12WSM-0011-R8a-SM-5DUWJ	GTEX-12WSM	0.367187	Male	65	Fast Death of Natural Causes	Brain	Brain - Hypothalamus
GTEX-12WSM-0226-SM-5LZV6	GTEX-12WSM	0.181096	Male	65	Fast Death of Natural Causes	Adipose Tissue	Adipose - Subcutaneous
GTEX-12WSM-0326-SM-5LZVI	GTEX-12WSM	0.370762	Male	65	Fast Death of Natural Causes	Muscle	Muscle - Skeletal
GTEX-12WSM-0426-SM-5LZVU	GTEX-12WSM	0.141124	Male	65	Fast Death of Natural Causes	Nerve	Nerve - Tibial
GTEX-12WSM-0526-SM-5GCO8	GTEX-12WSM	0.0988199	Male	65	Fast Death of Natural Causes	Blood Vessel	Artery - Tibial
GTEX-12WSM-0626-SM-5GCOK	GTEX-12WSM	0.13377	Male	65	Fast Death of Natural Causes	Adipose Tissue	Adipose - Visceral (Omentum)
GTEX-12WSM-0726-SM-5GCOW	GTEX-12WSM	0.383878	Male	65	Fast Death of Natural Causes	Liver	Liver
GTEX-12WSM-1326-SM-5GCP9	GTEX-12WSM	0.322574	Male	65	Fast Death of Natural Causes	Testis	Testis
GTEX-12WSM-1426-SM-5GCPA	GTEX-12WSM	0.177649	Male	65	Fast Death of Natural Causes	Colon	Colon - Sigmoid
GTEX-12WSM-1726-SM-5BC6J	GTEX-12WSM	0.179049	Male	65	Fast Death of Natural Causes	Breast	Breast - Mammary Tissue
GTEX-12WSM-1826-SM-5BC64	GTEX-12WSM	0.288969	Male	65	Fast Death of Natural Causes	Salivary Gland	Minor Salivary Gland
GTEX-12WSM-1926-SM-5BC65	GTEX-12WSM	0.338238	Male	65	Fast Death of Natural Causes	Skin	Skin - Not Sun Exposed (Suprapubic)
GTEX-12WSM-2126-SM-5GCOC	GTEX-12WSM	0.548095	Male	65	Fast Death of Natural Causes	Brain	Brain - Cerebellum
GTEX-12WSM-2226-SM-5DUVS	GTEX-12WSM	0.228004	Male	65	Fast Death of Natural Causes	Pituitary	Pituitary
GTEX-12WSN-0001-SM-664MG	GTEX-12WSN	0.908186	Male	45	Ventilator Case	Blood	Cells - EBV-transformed lymphocytes
GTEX-12WSN-0006-SM-5NQAP	GTEX-12WSN	0.511436	Male	45	Ventilator Case	Blood	Whole Blood
GTEX-12WSN-0008-SM-664MI	GTEX-12WSN	0.43123	Male	45	Ventilator Case	Skin	Cells - Cultured fibroblasts
GTEX-12WSN-0126-SM-5DUX5	GTEX-12WSN	0.365866	Male	45	Ventilator Case	Spleen	Spleen
GTEX-12WSN-0226-SM-5DUXH	GTEX-12WSN	0.178993	Male	45	Ventilator Case	Heart	Heart - Atrial Appendage
GTEX-12WSN-0326-SM-5GCP6	GTEX-12WSN	0.122574	Male	45	Ventilator Case	Blood Vessel	Artery - Aorta
GTEX-12WSN-0726-SM-5GCMS	GTEX-12WSN	0.228298	Male	45	Ventilator Case	Thyroid	Thyroid
GTEX-12WSN-0826-SM-5GCOF	GTEX-12WSN	0.388911	Male	45	Ventilator Case	Pancreas	Pancreas
GTEX-12WSN-0926-SM-5GCN1	GTEX-12WSN	0.293011	Male	45	Ventilator Case	Adrenal Gland	Adrenal Gland
GTEX-12WSN-1326-SM-5GCNT	GTEX-12WSN	0.200905	Male	45	Ventilator Case	Breast	Breast - Mammary Tissue
GTEX-12WSN-1826-SM-5LZUT	GTEX-12WSN	0.206887	Male	45	Ventilator Case	Esophagus	Esophagus - Gastroesophageal Junction
GTEX-12WSN-2226-SM-5DUXT	GTEX-12WSN	0.317735	Male	45	Ventilator Case	Salivary Gland	Minor Salivary Gland
GTEX-12WSN-2526-SM-5LZU8	GTEX-12WSN	0.403332	Male	45	Ventilator Case	Muscle	Muscle - Skeletal
GTEX-12WSN-2726-SM-5LZUK	GTEX-12WSN	0.195396	Male	45	Ventilator Case	Blood Vessel	Artery - Tibial
GTEX-12WSN-5001-SM-7DHMK	GTEX-12WSN	0.288792	Male	45	Ventilator Case	Heart	Heart - Left Ventricle
GTEX-12WSN-5004-SM-793CE	GTEX-12WSN	0.211957	Male	45	Ventilator Case	Lung	Lung
GTEX-12WSN-5007-SM-7MGWH	GTEX-12WSN	0.293635	Male	45	Ventilator Case	Prostate	Prostate
GTEX-12WSN-5013-SM-7P8P9	GTEX-12WSN	0.432031	Male	45	Ventilator Case	Esophagus	Esophagus - Mucosa
GTEX-12WSN-5016-SM-7DUGY	GTEX-12WSN	0.178341	Male	45	Ventilator Case	Esophagus	Esophagus - Muscularis
GTEX-12WSN-5019-SM-79OM6	GTEX-12WSN	0.207172	Male	45	Ventilator Case	Skin	Skin - Sun Exposed (Lower leg)
GTEX-12ZZW-0005-SM-5O9BY	GTEX-12ZZW	0.527681	Male	55	Slow Death	Blood	Whole Blood
GTEX-12ZZW-0008-SM-5YY9L	GTEX-12ZZW	0.480651	Male	55	Slow Death	Skin	Cells - Cultured fibroblasts
GTEX-12ZZW-0011-R10b-SM-5HL9X	GTEX-12ZZW	0.468111	Male	55	Slow Death	Brain	Brain - Frontal Cortex (BA9)
GTEX-12ZZW-0011-R3a-SM-5DUWW	GTEX-12ZZW	0.383322	Male	55	Slow Death	Brain	Brain - Anterior cingulate cortex (BA24)
GTEX-12ZZW-0011-R4a-SM-5DUX9	GTEX-12ZZW	0.391654	Male	55	Slow Death	Brain	Brain - Amygdala
GTEX-12ZZW-0011-R5a-SM-5DUVN	GTEX-12ZZW	0.431666	Male	55	Slow Death	Brain	Brain - Caudate (basal ganglia)
GTEX-12ZZW-0011-R6a-SM-5DUVZ	GTEX-12ZZW	0.4383	Male	55	Slow Death	Brain	Brain - Nucleus accumbens (basal ganglia)
GTEX-12ZZW-0011-R7a-SM-5DUWC	GTEX-12ZZW	0.456249	Male	55	Slow Death	Brain	Brain - Putamen (basal ganglia)
GTEX-12ZZW-0426-SM-5GCO9	GTEX-12ZZW	0.207613	Male	55	Slow Death	Blood Vessel	Artery - Tibial
GTEX-12ZZW-0926-SM-5LZUD	GTEX-12ZZW	0.0683428	Male	55	Slow Death	Lung	Lung
GTEX-12ZZW-1026-SM-5GCMM	GTEX-12ZZW	0.0864385	Male	55	Slow Death	Heart	Heart - Left Ventricle
GTEX-12ZZW-1726-SM-5DUVD	GTEX-12ZZW	0.42367	Male	55	Slow Death	Esophagus	Esophagus - Mucosa
GTEX-12ZZW-2326-SM-5DUW2	GTEX-12ZZW	0.117557	Male	55	Slow Death	Adipose Tissue	Adipose - Visceral (Omentum)
GTEX-12ZZW-2426-SM-5DUWE	GTEX-12ZZW	0.0833252	Male	55	Slow Death	Colon	Colon - Sigmoid
GTEX-12ZZW-2926-SM-5LZUP	GTEX-12ZZW	0.467636	Male	55	Slow Death	Brain	Brain - Cortex
GTEX-12ZZW-3026-SM-5LZW7	GTEX-12ZZW	0.360436	Male	55	Slow Death	Pituitary	Pituitary
GTEX-12ZZX-0005-SM-5O9A9	GTEX-12ZZX	0.498062	Female	45	Violent and Fast Death	Blood	Whole Blood
GTEX-12ZZX-0008-SM-5YY9N	GTEX-12ZZX	0.210477	Female	45	Violent and Fast Death	Skin	Cells - Cultured fibroblasts
GTEX-12ZZX-0011-R10b-SM-5DUWK	GTEX-12ZZX	0.525655	Female	45	Violent and Fast Death	Brain	Brain - Frontal Cortex (BA9)
GTEX-12ZZX-0011-R11a-SM-5DUVJ	GTEX-12ZZX	0.553151	Female	45	Violent and Fast Death	Brain	Brain - Cerebellar Hemisphere
GTEX-12ZZX-0011-R1a-SM-5EQ6B	GTEX-12ZZX	0.393946	Female	45	Violent and Fast Death	Brain	Brain - Hippocampus
GTEX-12ZZX-0011-R2a-SM-5EGLG	GTEX-12ZZX	0.430975	Female	45	Violent and Fast Death	Brain	Brain - Substantia nigra
GTEX-12ZZX-0011-R3b-SM-5EGLH	GTEX-12ZZX	0.420439	Female	45	Violent and Fast Death	Brain	Brain - Anterior cingulate cortex (BA24)
GTEX-12ZZX-0011-R5a-SM-5HL89	GTEX-12ZZX	0.392232	Female	45	Violent and Fast Death	Brain	Brain - Caudate (basal ganglia)
GTEX-12ZZX-0011-R6a-SM-5HL8L	GTEX-12ZZX	0.483007	Female	45	Violent and Fast Death	Brain	Brain - Nucleus accumbens (basal ganglia)
GTEX-12ZZX-0011-R7b-SM-5DUVV	GTEX-12ZZX	0.375995	Female	45	Violent and Fast Death	Brain	Brain - Putamen (basal ganglia)
GTEX-12ZZX-0011-R8a-SM-5DUW8	GTEX-12ZZX	0.385665	Female	45	Violent and Fast Death	Brain	Brain - Hypothalamus
GTEX-12ZZX-0126-SM-5EGK9	GTEX-12ZZX	0.325057	Female	45	Violent and Fast Death	Skin	Skin - Sun Exposed (Lower leg)
GTEX-12ZZX-0226-SM-5DUXU	GTEX-12ZZX	0.127547	Female	45	Violent and Fast Death	Adipose Tissue	Adipose - Subcutaneous
GTEX-12ZZX-0326-SM-5DUVH	GTEX-12ZZX	0.30811	Female	45	Violent and Fast Death	Muscle	Muscle - Skeletal
GTEX-12ZZX-0426-SM-5DUVT	GTEX-12ZZX	0.0792842	Female	45	Violent and Fast Death	Nerve	Nerve - Tibial
GTEX-12ZZX-0526-SM-5DUW6	GTEX-12ZZX	0.0749565	Female	45	Violent and Fast Death	Blood Vessel	Artery - Tibial
GTEX-12ZZX-0626-SM-5EQ46	GTEX-12ZZX	0.0319839	Female	45	Violent and Fast Death	Blood Vessel	Artery - Coronary
GTEX-12ZZX-0726-SM-5EGKA	GTEX-12ZZX	0.113637	Female	45	Violent and Fast Death	Heart	Heart - Atrial Appendage
GTEX-12ZZX-1026-SM-5LZUW	GTEX-12ZZX	0.0378948	Female	45	Violent and Fast Death	Blood Vessel	Artery - Aorta
GTEX-12ZZX-1126-SM-5EGKB	GTEX-12ZZX	0.162003	Female	45	Violent and Fast Death	Breast	Breast - Mammary Tissue
GTEX-12ZZX-1226-SM-5EGHS	GTEX-12ZZX	0.135168	Female	45	Violent and Fast Death	Thyroid	Thyroid
GTEX-12ZZX-1326-SM-5DUWI	GTEX-12ZZX	0.361552	Female	45	Violent and Fast Death	Esophagus	Esophagus - Mucosa
GTEX-12ZZX-1726-SM-5BC63	GTEX-12ZZX	0.131332	Female	45	Violent and Fast Death	Adipose Tissue	Adipose - Visceral (Omentum)
GTEX-12ZZX-1926-SM-5EGKC	GTEX-12ZZX	0.0168111	Female	45	Violent and Fast Death	Vagina	Vagina
GTEX-12ZZX-2026-SM-5LZV9	GTEX-12ZZX	0.163184	Female	45	Violent and Fast Death	Ovary	Ovary
GTEX-12ZZX-2126-SM-5LZVL	GTEX-12ZZX	0.093481	Female	45	Violent and Fast Death	Uterus	Uterus
GTEX-12ZZX-2426-SM-5GCOE	GTEX-12ZZX	0.370182	Female	45	Violent and Fast Death	Skin	Skin - Not Sun Exposed (Suprapubic)
GTEX-12ZZX-2726-SM-5N9FT	GTEX-12ZZX	0.118882	Female	45	Violent and Fast Death	Colon	Colon - Sigmoid
GTEX-12ZZX-2826-SM-5BC6K	GTEX-12ZZX	0.546167	Female	45	Violent and Fast Death	Brain	Brain - Cerebellum
GTEX-12ZZX-2926-SM-5GCOQ	GTEX-12ZZX	0.489747	Female	45	Violent and Fast Death	Brain	Brain - Cortex
GTEX-12ZZX-3026-SM-5GCP3	GTEX-12ZZX	0.169189	Female	45	Violent and Fast Death	Pituitary	Pituitary
GTEX-12ZZY-0008-SM-5YY9Q	GTEX-12ZZY	0.491942	Male	65	Fast Death of Natural Causes	Skin	Cells - Cultured fibroblasts
GTEX-12ZZY-0011-R10b-SM-5HL7W	GTEX-12ZZY	0.558554	Male	65	Fast Death of Natural Causes	Brain	Brain - Frontal Cortex (BA9)
GTEX-12ZZY-0011-R5a-SM-5EGL9	GTEX-12ZZY	0.452451	Male	65	Fast Death of Natural Causes	Brain	Brain - Caudate (basal ganglia)
GTEX-12ZZY-0011-R6b-SM-5EGLA	GTEX-12ZZY	0.446515	Male	65	Fast Death of Natural Causes	Brain	Brain - Nucleus accumbens (basal ganglia)
GTEX-12ZZY-0011-R7a-SM-5EGLB	GTEX-12ZZY	0.413017	Male	65	Fast Death of Natural Causes	Brain	Brain - Putamen (basal ganglia)
GTEX-12ZZY-0126-SM-5LZV2	GTEX-12ZZY	0.574603	Male	65	Fast Death of Natural Causes	Testis	Testis
GTEX-12ZZY-0226-SM-5LZVE	GTEX-12ZZY	0.360871	Male	65	Fast Death of Natural Causes	Skin	Skin - Sun Exposed (Lower leg)
GTEX-12ZZY-0326-SM-5LZVQ	GTEX-12ZZY	0.14101	Male	65	Fast Death of Natural Causes	Adipose Tissue	Adipose - Subcutaneous
GTEX-12ZZY-0426-SM-5LZW3	GTEX-12ZZY	0.070454	Male	65	Fast Death of Natural Causes	Nerve	Nerve - Tibial
GTEX-12ZZY-0526-SM-5EQ5H	GTEX-12ZZY	0.0304953	Male	65	Fast Death of Natural Causes	Blood Vessel	Artery - Tibial
GTEX-12ZZY-0626-SM-5EQ5T	GTEX-12ZZY	0.343288	Male	65	Fast Death of Natural Causes	Muscle	Muscle - Skeletal
GTEX-12ZZY-0726-SM-5EQ66	GTEX-12ZZY	0.345232	Male	65	Fast Death of Natural Causes	Skin	Skin - Not Sun Exposed (Suprapubic)
GTEX-12ZZY-0826-SM-5EQMT	GTEX-12ZZY	0.128826	Male	65	Fast Death of Natural Causes	Thyroid	Thyroid
GTEX-12ZZY-0926-SM-5EQ6I	GTEX-12ZZY	0.0551846	Male	65	Fast Death of Natural Causes	Lung	Lung
GTEX-12ZZY-1126-SM-5DUWQ	GTEX-12ZZY	0.147347	Male	65	Fast Death of Natural Causes	Heart	Heart - Left Ventricle
GTEX-12ZZY-1226-SM-5GCNK	GTEX-12ZZY	0.115338	Male	65	Fast Death of Natural Causes	Heart	Heart - Atrial Appendage
GTEX-12ZZY-1326-SM-5GCNW	GTEX-12ZZY	0.0562796	Male	65	Fast Death of Natural Causes	Blood Vessel	Artery - Aorta
GTEX-12ZZY-1426-SM-5N9EI	GTEX-12ZZY	0.355227	Male	65	Fast Death of Natural Causes	Esophagus	Esophagus - Mucosa
GTEX-12ZZY-1526-SM-5LZWF	GTEX-12ZZY	0.0728608	Male	65	Fast Death of Natural Causes	Esophagus	Esophagus - Muscularis
GTEX-12ZZY-2726-SM-5EQ45	GTEX-12ZZY	0.122283	Male	65	Fast Death of Natural Causes	Colon	Colon - Sigmoid
GTEX-12ZZY-2926-SM-5DUXO	GTEX-12ZZY	0.559838	Male	65	Fast Death of Natural Causes	Brain	Brain - Cerebellum
GTEX-12ZZY-3026-SM-5GCOU	GTEX-12ZZY	0.478933	Male	65	Fast Death of Natural Causes	Brain	Brain - Cortex
GTEX-12ZZY-3126-SM-5DUX3	GTEX-12ZZY	0.32176	Male	65	Fast Death of Natural Causes	Pituitary	Pituitary
GTEX-12ZZZ-0008-SM-5YY9S	GTEX-12ZZZ	0.377397	Male	65	Fast Death of Natural Causes	Skin	Cells - Cultured fibroblasts
GTEX-12ZZZ-0011-R10a-SM-5P9HC	GTEX-12ZZZ	0.52169	Male	65	Fast Death of Natural Causes	Brain	Brain - Frontal Cortex (BA9)
GTEX-12ZZZ-0011-R11a-SM-5EGLC	GTEX-12ZZZ	0.593715	Male	65	Fast Death of Natural Causes	Brain	Brain - Cerebellar Hemisphere
GTEX-12ZZZ-0011-R3b-SM-5DUXK	GTEX-12ZZZ	0.436341	Male	65	Fast Death of Natural Causes	Brain	Brain - Anterior cingulate cortex (BA24)
GTEX-12ZZZ-0011-R4b-SM-5DUV7	GTEX-12ZZZ	0.336814	Male	65	Fast Death of Natural Causes	Brain	Brain - Amygdala
GTEX-12ZZZ-0011-R5a-SM-5EQ4M	GTEX-12ZZZ	0.401	Male	65	Fast Death of Natural Causes	Brain	Brain - Caudate (basal ganglia)
GTEX-12ZZZ-0011-R6b-SM-5EQ5B	GTEX-12ZZZ	0.464799	Male	65	Fast Death of Natural Causes	Brain	Brain - Nucleus accumbens (basal ganglia)
GTEX-12ZZZ-0011-R7b-SM-5EGLE	GTEX-12ZZZ	0.428645	Male	65	Fast Death of Natural Causes	Brain	Brain - Putamen (basal ganglia)
GTEX-12ZZZ-0226-SM-59HKU	GTEX-12ZZZ	0.325868	Male	65	Fast Death of Natural Causes	Muscle	Muscle - Skeletal
GTEX-12ZZZ-0526-SM-5DUX6	GTEX-12ZZZ	0.120189	Male	65	Fast Death of Natural Causes	Adipose Tissue	Adipose - Subcutaneous
GTEX-12ZZZ-0626-SM-5DUXI	GTEX-12ZZZ	0.317388	Male	65	Fast Death of Natural Causes	Skin	Skin - Sun Exposed (Lower leg)
GTEX-12ZZZ-0726-SM-5GCNZ	GTEX-12ZZZ	0.308324	Male	65	Fast Death of Natural Causes	Skin	Skin - Not Sun Exposed (Suprapubic)
GTEX-12ZZZ-0926-SM-5N9EQ	GTEX-12ZZZ	0.200177	Male	65	Fast Death of Natural Causes	Adrenal Gland	Adrenal Gland
GTEX-12ZZZ-1226-SM-59HK1	GTEX-12ZZZ	0.178031	Male	65	Fast Death of Natural Causes	Thyroid	Thyroid
GTEX-12ZZZ-1326-SM-59HKW	GTEX-12ZZZ	0.319119	Male	65	Fast Death of Natural Causes	Liver	Liver
GTEX-12ZZZ-1726-SM-59HK5	GTEX-12ZZZ	0.17081	Male	65	Fast Death of Natural Causes	Heart	Heart - Left Ventricle
GTEX-12ZZZ-2026-SM-5LZWJ	GTEX-12ZZZ	0.102811	Male	65	Fast Death of Natural Causes	Prostate	Prostate
GTEX-12ZZZ-2426-SM-5GCNN	GTEX-12ZZZ	0.0650077	Male	65	Fast Death of Natural Causes	Colon	Colon - Transverse
GTEX-12ZZZ-3026-SM-5BC67	GTEX-12ZZZ	0.442874	Male	65	Fast Death of Natural Causes	Brain	Brain - Cortex
GTEX-12ZZZ-3126-SM-5LZU6	GTEX-12ZZZ	0.556178	Male	65	Fast Death of Natural Causes	Brain	Brain - Cerebellum
GTEX-13111-0002-SM-5TDBU	GTEX-13111	0.877537	Male	55	Ventilator Case	Blood	Cells - EBV-transformed lymphocytes
GTEX-13111-0005-SM-5NQ7Z	GTEX-13111	0.537957	Male	55	Ventilator Case	Blood	Whole Blood
GTEX-13111-0008-SM-5YY8R	GTEX-13111	0.486098	Male	55	Ventilator Case	Skin	Cells - Cultured fibroblasts
GTEX-13111-0126-SM-5EGHO	GTEX-13111	0.32727	Male	55	Ventilator Case	Spleen	Spleen
GTEX-13111-0226-SM-5EQ55	GTEX-13111	0.181501	Male	55	Ventilator Case	Thyroid	Thyroid
GTEX-13111-0326-SM-5DUXF	GTEX-13111	0.2731	Male	55	Ventilator Case	Adrenal Gland	Adrenal Gland
GTEX-13111-0426-SM-5DUXR	GTEX-13111	0.216595	Male	55	Ventilator Case	Lung	Lung
GTEX-13111-0526-SM-5LZVF	GTEX-13111	0.085924	Male	55	Ventilator Case	Blood Vessel	Artery - Aorta
GTEX-13111-0626-SM-5LZVR	GTEX-13111	0.219376	Male	55	Ventilator Case	Adipose Tissue	Adipose - Visceral (Omentum)
GTEX-13111-0726-SM-5DUVE	GTEX-13111	0.410723	Male	55	Ventilator Case	Colon	Colon - Transverse
GTEX-13111-0826-SM-5LZV3	GTEX-13111	0.458161	Male	55	Ventilator Case	Esophagus	Esophagus - Mucosa
GTEX-13111-0926-SM-5DUVQ	GTEX-13111	0.151408	Male	55	Ventilator Case	Esophagus	Esophagus - Muscularis
GTEX-13111-1126-SM-5GCMZ	GTEX-13111	0.160312	Male	55	Ventilator Case	Esophagus	Esophagus - Gastroesophageal Junction
GTEX-13111-1226-SM-5GCNC	GTEX-13111	0.132841	Male	55	Ventilator Case	Stomach	Stomach
GTEX-13111-1326-SM-5GCNO	GTEX-13111	0.132723	Male	55	Ventilator Case	Prostate	Prostate
GTEX-13111-1426-SM-5DUW3	GTEX-13111	0.177892	Male	55	Ventilator Case	Small Intestine	Small Intestine - Terminal Ileum
GTEX-13111-1526-SM-5EGJX	GTEX-13111	0.519444	Male	55	Ventilator Case	Testis	Testis
GTEX-13111-1626-SM-5EGJY	GTEX-13111	0.394062	Male	55	Ventilator Case	Skin	Skin - Sun Exposed (Lower leg)
GTEX-13111-1726-SM-5EGJZ	GTEX-13111	0.0999525	Male	55	Ventilator Case	Adipose Tissue	Adipose - Subcutaneous
GTEX-13111-1926-SM-5GCOL	GTEX-13111	0.148616	Male	55	Ventilator Case	Colon	Colon - Sigmoid
GTEX-13111-2026-SM-5GCMN	GTEX-13111	0.170273	Male	55	Ventilator Case	Nerve	Nerve - Tibial
GTEX-13111-2126-SM-5LZU2	GTEX-13111	0.152214	Male	55	Ventilator Case	Blood Vessel	Artery - Tibial
GTEX-13111-2226-SM-5LZUE	GTEX-13111	0.433403	Male	55	Ventilator Case	Muscle	Muscle - Skeletal
GTEX-13111-2326-SM-5LZUQ	GTEX-13111	0.254795	Male	55	Ventilator Case	Salivary Gland	Minor Salivary Gland
GTEX-13112-0008-SM-5YY9M	GTEX-13112	0.189778	Male	55	Fast Death of Natural Causes	Skin	Cells - Cultured fibroblasts
GTEX-13112-0011-R1b-SM-5HL7K	GTEX-13112	0.44886	Male	55	Fast Death of Natural Causes	Brain	Brain - Hippocampus
GTEX-13112-0011-R3b-SM-5HL9L	GTEX-13112	0.444196	Male	55	Fast Death of Natural Causes	Brain	Brain - Anterior cingulate cortex (BA24)
GTEX-13112-0011-R4b-SM-5DUXL	GTEX-13112	0.402375	Male	55	Fast Death of Natural Causes	Brain	Brain - Amygdala
GTEX-13112-0011-R5b-SM-5DUV8	GTEX-13112	0.359922	Male	55	Fast Death of Natural Causes	Brain	Brain - Caudate (basal ganglia)
GTEX-13112-0011-R6b-SM-5DUVK	GTEX-13112	0.450628	Male	55	Fast Death of Natural Causes	Brain	Brain - Nucleus accumbens (basal ganglia)
GTEX-13112-0011-R7b-SM-5DUVW	GTEX-13112	0.431745	Male	55	Fast Death of Natural Causes	Brain	Brain - Putamen (basal ganglia)
GTEX-13112-0011-R8b-SM-664OV	GTEX-13112	0.325989	Male	55	Fast Death of Natural Causes	Brain	Brain - Hypothalamus
GTEX-13112-0126-SM-5P9IU	GTEX-13112	0.381172	Male	55	Fast Death of Natural Causes	Skin	Skin - Not Sun Exposed (Suprapubic)
GTEX-13112-0226-SM-5P9IV	GTEX-13112	0.615899	Male	55	Fast Death of Natural Causes	Testis	Testis
GTEX-13112-0326-SM-5P9IW	GTEX-13112	0.143493	Male	55	Fast Death of Natural Causes	Thyroid	Thyroid
GTEX-13112-0426-SM-5PNVC	GTEX-13112	0.132149	Male	55	Fast Death of Natural Causes	Heart	Heart - Left Ventricle
GTEX-13112-0526-SM-5EQ4S	GTEX-13112	0.092354	Male	55	Fast Death of Natural Causes	Heart	Heart - Atrial Appendage
GTEX-13112-1126-SM-5GCMY	GTEX-13112	0.112476	Male	55	Fast Death of Natural Causes	Adipose Tissue	Adipose - Visceral (Omentum)
GTEX-13112-1426-SM-5EGH8	GTEX-13112	0.362352	Male	55	Fast Death of Natural Causes	Liver	Liver
GTEX-13112-2126-SM-5GCO4	GTEX-13112	0.205768	Male	55	Fast Death of Natural Causes	Kidney	Kidney - Cortex
GTEX-13112-2626-SM-5BC66	GTEX-13112	0.368098	Male	55	Fast Death of Natural Causes	Muscle	Muscle - Skeletal
GTEX-13112-2726-SM-5DUW5	GTEX-13112	0.114434	Male	55	Fast Death of Natural Causes	Adipose Tissue	Adipose - Subcutaneous
GTEX-13112-2826-SM-5DUWH	GTEX-13112	0.333125	Male	55	Fast Death of Natural Causes	Skin	Skin - Sun Exposed (Lower leg)
GTEX-13112-2926-SM-5DUWT	GTEX-13112	0.55666	Male	55	Fast Death of Natural Causes	Brain	Brain - Cerebellum
GTEX-13112-3126-SM-5IFGP	GTEX-13112	0.332644	Male	55	Fast Death of Natural Causes	Pituitary	Pituitary
GTEX-13113-0006-SM-5NQ7X	GTEX-13113	0.493266	Female	65	Ventilator Case	Blood	Whole Blood
GTEX-13113-0008-SM-5YY9T	GTEX-13113	0.205287	Female	65	Ventilator Case	Skin	Cells - Cultured fibroblasts
GTEX-13113-0126-SM-5LZVX	GTEX-13113	0.240473	Female	65	Ventilator Case	Thyroid	Thyroid
GTEX-13113-0526-SM-5GCN2	GTEX-13113	0.0855558	Female	65	Ventilator Case	Blood Vessel	Artery - Aorta
GTEX-13113-0626-SM-5GCP2	GTEX-13113	0.16486	Female	65	Ventilator Case	Esophagus	Esophagus - Gastroesophageal Junction
GTEX-13113-0726-SM-5LZUF	GTEX-13113	0.313463	Female	65	Ventilator Case	Stomach	Stomach
GTEX-13113-1126-SM-5LZU9	GTEX-13113	0.17626	Female	65	Ventilator Case	Adipose Tissue	Adipose - Visceral (Omentum)
GTEX-13113-1226-SM-5EGHT	GTEX-13113	0.301018	Female	65	Ventilator Case	Small Intestine	Small Intestine - Terminal Ileum
GTEX-13113-1326-SM-5GCOI	GTEX-13113	0.401472	Female	65	Ventilator Case	Liver	Liver
GTEX-13113-1426-SM-5EGHU	GTEX-13113	0.248817	Female	65	Ventilator Case	Colon	Colon - Sigmoid
GTEX-13113-1526-SM-5EGHV	GTEX-13113	0.225785	Female	65	Ventilator Case	Salivary Gland	Minor Salivary Gland
GTEX-13113-1626-SM-5EQ4I	GTEX-13113	0.254047	Female	65	Ventilator Case	Skin	Skin - Not Sun Exposed (Suprapubic)
GTEX-13113-1826-SM-5LZW4	GTEX-13113	0.185154	Female	65	Ventilator Case	Adipose Tissue	Adipose - Subcutaneous
GTEX-13113-2026-SM-5LZU3	GTEX-13113	0.103908	Female	65	Ventilator Case	Nerve	Nerve - Tibial
GTEX-13113-2126-SM-5EQ4U	GTEX-13113	0.126432	Female	65	Ventilator Case	Blood Vessel	Artery - Tibial
GTEX-13113-5004-SM-79ONL	GTEX-13113	0.208257	Female	65	Ventilator Case	Lung	Lung
GTEX-13113-5010-SM-7RHFP	GTEX-13113	0.209568	Female	65	Ventilator Case	Esophagus	Esophagus - Muscularis
GTEX-13113-5013-SM-7SB7G	GTEX-13113	0.19527	Female	65	Ventilator Case	Breast	Breast - Mammary Tissue
GTEX-13113-5016-SM-7EPIP	GTEX-13113	0.363502	Female	65	Ventilator Case	Skin	Skin - Sun Exposed (Lower leg)
GTEX-13113-5019-SM-7EPH2	GTEX-13113	0.367654	Female	65	Ventilator Case	Muscle	Muscle - Skeletal
GTEX-1313W-0006-SM-5O9B1	GTEX-1313W	0.516351	Female	55	Fast Death of Natural Causes	Blood	Whole Blood
GTEX-1313W-0008-SM-5YYAP	GTEX-1313W	0.378864	Female	55	Fast Death of Natural Causes	Skin	Cells - Cultured fibroblasts
GTEX-1313W-0011-R10b-SM-5DUXA	GTEX-1313W	0.554515	Female	55	Fast Death of Natural Causes	Brain	Brain - Frontal Cortex (BA9)
GTEX-1313W-0011-R11a-SM-5DUXN	GTEX-1313W	0.588494	Female	55	Fast Death of Natural Causes	Brain	Brain - Cerebellar Hemisphere
GTEX-1313W-0011-R1b-SM-5EQ4A	GTEX-1313W	0.475824	Female	55	Fast Death of Natural Causes	Brain	Brain - Hippocampus
GTEX-1313W-0011-R2a-SM-5EGLF	GTEX-1313W	0.475495	Female	55	Fast Death of Natural Causes	Brain	Brain - Substantia nigra
GTEX-1313W-0011-R3a-SM-5EGLI	GTEX-1313W	0.505586	Female	55	Fast Death of Natural Causes	Brain	Brain - Anterior cingulate cortex (BA24)
GTEX-1313W-0011-R4b-SM-5KLZV	GTEX-1313W	0.435187	Female	55	Fast Death of Natural Causes	Brain	Brain - Amygdala
GTEX-1313W-0011-R5b-SM-5L3EP	GTEX-1313W	0.482842	Female	55	Fast Death of Natural Causes	Brain	Brain - Caudate (basal ganglia)
GTEX-1313W-0011-R6a-SM-5K7XO	GTEX-1313W	0.508475	Female	55	Fast Death of Natural Causes	Brain	Brain - Nucleus accumbens (basal ganglia)
GTEX-1313W-0011-R7b-SM-5DUWL	GTEX-1313W	0.471784	Female	55	Fast Death of Natural Causes	Brain	Brain - Putamen (basal ganglia)
GTEX-1313W-0011-R8a-SM-5DUVM	GTEX-1313W	0.456318	Female	55	Fast Death of Natural Causes	Brain	Brain - Hypothalamus
GTEX-1313W-0126-SM-5LZUN	GTEX-1313W	0.291902	Female	55	Fast Death of Natural Causes	Skin	Skin - Sun Exposed (Lower leg)
GTEX-1313W-0226-SM-5LZV7	GTEX-1313W	0.116193	Female	55	Fast Death of Natural Causes	Adipose Tissue	Adipose - Subcutaneous
GTEX-1313W-0326-SM-5LZU5	GTEX-1313W	0.102922	Female	55	Fast Death of Natural Causes	Nerve	Nerve - Tibial
GTEX-1313W-0526-SM-5P9FZ	GTEX-1313W	0.385543	Female	55	Fast Death of Natural Causes	Muscle	Muscle - Skeletal
GTEX-1313W-0626-SM-5EQ4H	GTEX-1313W	0.405225	Female	55	Fast Death of Natural Causes	Skin	Skin - Not Sun Exposed (Suprapubic)
GTEX-1313W-0726-SM-5EGK1	GTEX-1313W	0.183516	Female	55	Fast Death of Natural Causes	Thyroid	Thyroid
GTEX-1313W-0826-SM-5EQ4T	GTEX-1313W	0.129859	Female	55	Fast Death of Natural Causes	Breast	Breast - Mammary Tissue
GTEX-1313W-0926-SM-5EQ56	GTEX-1313W	0.220135	Female	55	Fast Death of Natural Causes	Lung	Lung
GTEX-1313W-1026-SM-5EQ5I	GTEX-1313W	0.035759	Female	55	Fast Death of Natural Causes	Blood Vessel	Artery - Aorta
GTEX-1313W-1126-SM-5EQ5U	GTEX-1313W	0.107224	Female	55	Fast Death of Natural Causes	Heart	Heart - Atrial Appendage
GTEX-1313W-1426-SM-5KLZU	GTEX-1313W	0.184956	Female	55	Fast Death of Natural Causes	Heart	Heart - Left Ventricle
GTEX-1313W-1626-SM-5J1OE	GTEX-1313W	0.126817	Female	55	Fast Death of Natural Causes	Adipose Tissue	Adipose - Visceral (Omentum)
GTEX-1313W-2726-SM-5P9IX	GTEX-1313W	0.175318	Female	55	Fast Death of Natural Causes	Ovary	Ovary
GTEX-1313W-2826-SM-5P9G1	GTEX-1313W	0.115852	Female	55	Fast Death of Natural Causes	Uterus	Uterus
GTEX-1313W-3026-SM-5LZUZ	GTEX-1313W	0.564708	Female	55	Fast Death of Natural Causes	Brain	Brain - Cerebellum
GTEX-1313W-3126-SM-5LZUI	GTEX-1313W	0.511514	Female	55	Fast Death of Natural Causes	Brain	Brain - Cortex
GTEX-1313W-3226-SM-5LZUU	GTEX-1313W	0.24561	Female	55	Fast Death of Natural Causes	Pituitary	Pituitary
GTEX-1314G-0005-SM-5NQ9O	GTEX-1314G	0.502945	Male	35	Ventilator Case	Blood	Whole Blood
GTEX-1314G-0008-SM-5YY9K	GTEX-1314G	0.474874	Male	35	Ventilator Case	Skin	Cells - Cultured fibroblasts
GTEX-1314G-0126-SM-5LZUL	GTEX-1314G	0.191002	Male	35	Ventilator Case	Heart	Heart - Left Ventricle
GTEX-1314G-1226-SM-5BC6D	GTEX-1314G	0.158215	Male	35	Ventilator Case	Breast	Breast - Mammary Tissue
GTEX-1314G-1326-SM-5BC6E	GTEX-1314G	0.237965	Male	35	Ventilator Case	Skin	Skin - Not Sun Exposed (Suprapubic)
GTEX-1314G-1526-SM-5EGK2	GTEX-1314G	0.263116	Male	35	Ventilator Case	Skin	Skin - Sun Exposed (Lower leg)
GTEX-1314G-1626-SM-5EQ67	GTEX-1314G	0.109177	Male	35	Ventilator Case	Adipose Tissue	Adipose - Subcutaneous
GTEX-1314G-1726-SM-5LZUX	GTEX-1314G	0.380119	Male	35	Ventilator Case	Muscle	Muscle - Skeletal
GTEX-1314G-1826-SM-5LZVA	GTEX-1314G	0.119485	Male	35	Ventilator Case	Nerve	Nerve - Tibial
GTEX-1314G-1926-SM-5BC6F	GTEX-1314G	0.144943	Male	35	Ventilator Case	Blood Vessel	Artery - Tibial
GTEX-1314G-2026-SM-5LZUM	GTEX-1314G	0.252033	Male	35	Ventilator Case	Salivary Gland	Minor Salivary Gland
GTEX-131XE-0006-SM-5P9F9	GTEX-131XE	0.557435	Male	55	Ventilator Case	Blood	Whole Blood
GTEX-131XE-0126-SM-5LZVC	GTEX-131XE	0.246346	Male	55	Ventilator Case	Thyroid	Thyroid
GTEX-131XE-0326-SM-5LZVO	GTEX-131XE	0.347589	Male	55	Ventilator Case	Liver	Liver
GTEX-131XE-0426-SM-5IJF4	GTEX-131XE	0.497459	Male	55	Ventilator Case	Testis	Testis
GTEX-131XE-0526-SM-5K7YT	GTEX-131XE	0.172904	Male	55	Ventilator Case	Heart	Heart - Atrial Appendage
GTEX-131XE-0626-SM-5HL98	GTEX-131XE	0.200357	Male	55	Ventilator Case	Heart	Heart - Left Ventricle
GTEX-131XE-0726-SM-5HL9K	GTEX-131XE	0.175064	Male	55	Ventilator Case	Lung	Lung
GTEX-131XE-0826-SM-5HL9W	GTEX-131XE	0.361105	Male	55	Ventilator Case	Colon	Colon - Transverse
GTEX-131XE-0926-SM-5HL7J	GTEX-131XE	0.197349	Male	55	Ventilator Case	Small Intestine	Small Intestine - Terminal Ileum
GTEX-131XE-1026-SM-5EGKE	GTEX-131XE	0.221291	Male	55	Ventilator Case	Colon	Colon - Sigmoid
GTEX-131XE-1126-SM-5EGHW	GTEX-131XE	0.457151	Male	55	Ventilator Case	Spleen	Spleen
GTEX-131XE-1226-SM-5EGKF	GTEX-131XE	0.16452	Male	55	Ventilator Case	Esophagus	Esophagus - Muscularis
GTEX-131XE-1426-SM-5HL7V	GTEX-131XE	0.419359	Male	55	Ventilator Case	Esophagus	Esophagus - Mucosa
GTEX-131XE-1526-SM-5KM1A	GTEX-131XE	0.166407	Male	55	Ventilator Case	Esophagus	Esophagus - Gastroesophageal Junction
GTEX-131XE-1926-SM-5IFER	GTEX-131XE	0.355072	Male	55	Ventilator Case	Pancreas	Pancreas
GTEX-131XE-2026-SM-5LZW1	GTEX-131XE	0.170966	Male	55	Ventilator Case	Adipose Tissue	Adipose - Visceral (Omentum)
GTEX-131XE-2226-SM-5PNYX	GTEX-131XE	0.146621	Male	55	Ventilator Case	Stomach	Stomach
GTEX-131XE-2326-SM-5PNZ2	GTEX-131XE	0.340533	Male	55	Ventilator Case	Skin	Skin - Sun Exposed (Lower leg)
GTEX-131XE-2426-SM-5EQ5V	GTEX-131XE	0.177927	Male	55	Ventilator Case	Adipose Tissue	Adipose - Subcutaneous
GTEX-131XE-2526-SM-5EQ57	GTEX-131XE	0.179288	Male	55	Ventilator Case	Nerve	Nerve - Tibial
GTEX-131XE-2626-SM-5PNYY	GTEX-131XE	0.122844	Male	55	Ventilator Case	Blood Vessel	Artery - Tibial
GTEX-131XE-2726-SM-5P9G7	GTEX-131XE	0.413283	Male	55	Ventilator Case	Muscle	Muscle - Skeletal
GTEX-131XF-0006-SM-5P9HK	GTEX-131XF	0.558531	Male	65	Ventilator Case	Blood	Whole Blood
GTEX-131XF-0008-SM-664MH	GTEX-131XF	0.267658	Male	65	Ventilator Case	Skin	Cells - Cultured fibroblasts
GTEX-131XF-0126-SM-5DUVF	GTEX-131XF	0.29753	Male	65	Ventilator Case	Adrenal Gland	Adrenal Gland
GTEX-131XF-0426-SM-5HL7U	GTEX-131XF	0.208024	Male	65	Ventilator Case	Heart	Heart - Atrial Appendage
GTEX-131XF-0526-SM-5HL87	GTEX-131XF	0.124799	Male	65	Ventilator Case	Blood Vessel	Artery - Coronary
GTEX-131XF-0626-SM-5GIDS	GTEX-131XF	0.099497	Male	65	Ventilator Case	Blood Vessel	Artery - Aorta
GTEX-131XF-0726-SM-5GIE5	GTEX-131XF	0.207413	Male	65	Ventilator Case	Adipose Tissue	Adipose - Visceral (Omentum)
GTEX-131XF-0826-SM-5GICG	GTEX-131XF	0.490263	Male	65	Ventilator Case	Esophagus	Esophagus - Mucosa
GTEX-131XF-1026-SM-5BC6A	GTEX-131XF	0.158746	Male	65	Ventilator Case	Lung	Lung
GTEX-131XF-1126-SM-5HL8J	GTEX-131XF	0.175535	Male	65	Ventilator Case	Esophagus	Esophagus - Gastroesophageal Junction
GTEX-131XF-1226-SM-5HL8V	GTEX-131XF	0.324202	Male	65	Ventilator Case	Stomach	Stomach
GTEX-131XF-1326-SM-5GCMQ	GTEX-131XF	0.383899	Male	65	Ventilator Case	Small Intestine	Small Intestine - Terminal Ileum
GTEX-131XF-1426-SM-5BC68	GTEX-131XF	0.400371	Male	65	Ventilator Case	Pancreas	Pancreas
GTEX-131XF-1826-SM-5EGKG	GTEX-131XF	0.22414	Male	65	Ventilator Case	Thyroid	Thyroid
GTEX-131XF-2226-SM-5EQKG	GTEX-131XF	0.160746	Male	65	Ventilator Case	Adipose Tissue	Adipose - Subcutaneous
GTEX-131XF-2326-SM-5BC6B	GTEX-131XF	0.439026	Male	65	Ventilator Case	Muscle	Muscle - Skeletal
GTEX-131XF-2426-SM-5BC6C	GTEX-131XF	0.156204	Male	65	Ventilator Case	Nerve	Nerve - Tibial
GTEX-131XF-2526-SM-5EQ68	GTEX-131XF	0.134274	Male	65	Ventilator Case	Blood Vessel	Artery - Tibial
GTEX-131XF-2626-SM-5EQ6K	GTEX-131XF	0.319193	Male	65	Ventilator Case	Skin	Skin - Not Sun Exposed (Suprapubic)
GTEX-131XF-2826-SM-5EGKH	GTEX-131XF	0.239042	Male	65	Ventilator Case	Salivary Gland	Minor Salivary Gland
GTEX-131XF-5001-SM-7DHLY	GTEX-131XF	0.282775	Male	65	Ventilator Case	Heart	Heart - Left Ventricle
GTEX-131XF-5007-SM-7PC34	GTEX-131XF	0.236817	Male	65	Ventilator Case	Esophagus	Esophagus - Muscularis
GTEX-131XF-5013-SM-7EWFI	GTEX-131XF	0.285914	Male	65	Ventilator Case	Prostate	Prostate
GTEX-131XF-5016-SM-7MGWE	GTEX-131XF	0.354256	Male	65	Ventilator Case	Skin	Skin - Sun Exposed (Lower leg)
GTEX-131XG-0006-SM-5O9CE	GTEX-131XG	0.547292	Female	55	Ventilator Case	Blood	Whole Blood
GTEX-131XG-0008-SM-5YY9O	GTEX-131XG	0.454638	Female	55	Ventilator Case	Skin	Cells - Cultured fibroblasts
GTEX-131XG-0126-SM-5K7UJ	GTEX-131XG	0.229058	Female	55	Ventilator Case	Adipose Tissue	Adipose - Visceral (Omentum)
GTEX-131XG-0226-SM-5IFG1	GTEX-131XG	0.241568	Female	55	Ventilator Case	Thyroid	Thyroid
GTEX-131XG-0326-SM-5L3DX	GTEX-131XG	0.372767	Female	55	Ventilator Case	Skin	Skin - Not Sun Exposed (Suprapubic)
GTEX-131XG-0426-SM-5IFGD	GTEX-131XG	0.312891	Female	55	Ventilator Case	Spleen	Spleen
GTEX-131XG-0526-SM-5DUWF	GTEX-131XG	0.224365	Female	55	Ventilator Case	Heart	Heart - Atrial Appendage
GTEX-131XG-0626-SM-5GCMP	GTEX-131XG	0.274457	Female	55	Ventilator Case	Heart	Heart - Left Ventricle
GTEX-131XG-0826-SM-5LZVS	GTEX-131XG	0.148522	Female	55	Ventilator Case	Blood Vessel	Artery - Coronary
GTEX-131XG-0926-SM-5LZW5	GTEX-131XG	0.270372	Female	55	Ventilator Case	Esophagus	Esophagus - Muscularis
GTEX-131XG-1026-SM-5GCMX	GTEX-131XG	0.405369	Female	55	Ventilator Case	Esophagus	Esophagus - Mucosa
GTEX-131XG-1126-SM-5DUWR	GTEX-131XG	0.148437	Female	55	Ventilator Case	Esophagus	Esophagus - Gastroesophageal Junction
GTEX-131XG-1226-SM-5EGH9	GTEX-131XG	0.488036	Female	55	Ventilator Case	Stomach	Stomach
GTEX-131XG-1326-SM-5DUX4	GTEX-131XG	0.29134	Female	55	Ventilator Case	Adrenal Gland	Adrenal Gland
GTEX-131XG-1426-SM-5GCMO	GTEX-131XG	0.424328	Female	55	Ventilator Case	Pancreas	Pancreas
GTEX-131XG-1526-SM-5GCNQ	GTEX-131XG	0.238152	Female	55	Ventilator Case	Colon	Colon - Sigmoid
GTEX-131XG-1726-SM-5LZUR	GTEX-131XG	0.379648	Female	55	Ventilator Case	Small Intestine	Small Intestine - Terminal Ileum
GTEX-131XG-1826-SM-5LZV4	GTEX-131XG	0.435398	Female	55	Ventilator Case	Colon	Colon - Transverse
GTEX-131XG-1926-SM-5LZVG	GTEX-131XG	0.138213	Female	55	Ventilator Case	Ovary	Ovary
GTEX-131XG-2026-SM-5GCN5	GTEX-131XG	0.158124	Female	55	Ventilator Case	Uterus	Uterus
GTEX-131XG-2126-SM-5DUXG	GTEX-131XG	0.205157	Female	55	Ventilator Case	Vagina	Vagina
GTEX-131XG-2226-SM-5DUXS	GTEX-131XG	0.166329	Female	55	Ventilator Case	Blood Vessel	Artery - Tibial
GTEX-131XG-2326-SM-5HL8F	GTEX-131XG	0.419623	Female	55	Ventilator Case	Muscle	Muscle - Skeletal
GTEX-131XG-2526-SM-5HL7F	GTEX-131XG	0.172793	Female	55	Ventilator Case	Nerve	Nerve - Tibial
GTEX-131XG-2626-SM-5KM17	GTEX-131XG	0.268199	Female	55	Ventilator Case	Skin	Skin - Sun Exposed (Lower leg)
GTEX-131XH-0006-SM-5O98V	GTEX-131XH	0.470483	Male	55	Fast Death of Natural Causes	Blood	Whole Blood
GTEX-131XH-0008-SM-5YYAC	GTEX-131XH	0.367556	Male	55	Fast Death of Natural Causes	Skin	Cells - Cultured fibroblasts
GTEX-131XH-0011-R10a-SM-5EGLJ	GTEX-131XH	0.509961	Male	55	Fast Death of Natural Causes	Brain	Brain - Frontal Cortex (BA9)
GTEX-131XH-0011-R11a-SM-5EGLN	GTEX-131XH	0.573314	Male	55	Fast Death of Natural Causes	Brain	Brain - Cerebellar Hemisphere
GTEX-131XH-0011-R1a-SM-5DUWA	GTEX-131XH	0.489736	Male	55	Fast Death of Natural Causes	Brain	Brain - Hippocampus
GTEX-131XH-0011-R2b-SM-5DUVY	GTEX-131XH	0.38753	Male	55	Fast Death of Natural Causes	Brain	Brain - Substantia nigra
GTEX-131XH-0011-R3b-SM-5DUWM	GTEX-131XH	0.51251	Male	55	Fast Death of Natural Causes	Brain	Brain - Anterior cingulate cortex (BA24)
GTEX-131XH-0011-R4b-SM-5DUWB	GTEX-131XH	0.449543	Male	55	Fast Death of Natural Causes	Brain	Brain - Amygdala
GTEX-131XH-0011-R6a-SM-5KM2G	GTEX-131XH	0.490414	Male	55	Fast Death of Natural Causes	Brain	Brain - Nucleus accumbens (basal ganglia)
GTEX-131XH-0011-R8a-SM-5EGLL	GTEX-131XH	0.450802	Male	55	Fast Death of Natural Causes	Brain	Brain - Hypothalamus
GTEX-131XH-0126-SM-5LZUY	GTEX-131XH	0.324665	Male	55	Fast Death of Natural Causes	Skin	Skin - Not Sun Exposed (Suprapubic)
GTEX-131XH-0226-SM-5LZVB	GTEX-131XH	0.150572	Male	55	Fast Death of Natural Causes	Heart	Heart - Left Ventricle
GTEX-131XH-0426-SM-5DUWU	GTEX-131XH	0.0668635	Male	55	Fast Death of Natural Causes	Lung	Lung
GTEX-131XH-0526-SM-5DUX7	GTEX-131XH	0.196397	Male	55	Fast Death of Natural Causes	Thyroid	Thyroid
GTEX-131XH-0626-SM-5LZWH	GTEX-131XH	0.397649	Male	55	Fast Death of Natural Causes	Liver	Liver
GTEX-131XH-0826-SM-5GCN8	GTEX-131XH	0.15998	Male	55	Fast Death of Natural Causes	Adipose Tissue	Adipose - Visceral (Omentum)
GTEX-131XH-2226-SM-5DUXJ	GTEX-131XH	0.339007	Male	55	Fast Death of Natural Causes	Skin	Skin - Sun Exposed (Lower leg)
GTEX-131XH-2426-SM-5PNZ6	GTEX-131XH	0.130753	Male	55	Fast Death of Natural Causes	Blood Vessel	Artery - Tibial
GTEX-131XH-2526-SM-5GCND	GTEX-131XH	0.123648	Male	55	Fast Death of Natural Causes	Nerve	Nerve - Tibial
GTEX-131XH-2626-SM-5GCNP	GTEX-131XH	0.323083	Male	55	Fast Death of Natural Causes	Salivary Gland	Minor Salivary Gland
GTEX-131XH-2726-SM-5GCO2	GTEX-131XH	0.331106	Male	55	Fast Death of Natural Causes	Muscle	Muscle - Skeletal
GTEX-131XH-2926-SM-5LZU4	GTEX-131XH	0.572564	Male	55	Fast Death of Natural Causes	Brain	Brain - Cerebellum
GTEX-131XW-0006-SM-5O9AO	GTEX-131XW	0.511841	Female	55	Slow Death	Blood	Whole Blood
GTEX-131XW-0008-SM-664MJ	GTEX-131XW	0.181392	Female	55	Slow Death	Skin	Cells - Cultured fibroblasts
GTEX-131XW-0011-R10a-SM-5DUVA	GTEX-131XW	0.427169	Female	55	Slow Death	Brain	Brain - Frontal Cortex (BA9)
GTEX-131XW-0011-R11a-SM-5DUV9	GTEX-131XW	0.51401	Female	55	Slow Death	Brain	Brain - Cerebellar Hemisphere
GTEX-131XW-0011-R6b-SM-5K7XY	GTEX-131XW	0.349902	Female	55	Slow Death	Brain	Brain - Nucleus accumbens (basal ganglia)
GTEX-131XW-0011-R8a-SM-5DUWY	GTEX-131XW	0.371307	Female	55	Slow Death	Brain	Brain - Hypothalamus
GTEX-131XW-0011-R9a-SM-5N9EO	GTEX-131XW	0.366581	Female	55	Slow Death	Brain	Brain - Spinal cord (cervical c-1)
GTEX-131XW-0126-SM-5LZWD	GTEX-131XW	0.0988062	Female	55	Slow Death	Nerve	Nerve - Tibial
GTEX-131XW-0226-SM-5IJCA	GTEX-131XW	0.0646125	Female	55	Slow Death	Blood Vessel	Artery - Tibial
GTEX-131XW-0326-SM-5KM1J	GTEX-131XW	0.328896	Female	55	Slow Death	Muscle	Muscle - Skeletal
GTEX-131XW-0426-SM-5LZWP	GTEX-131XW	0.263963	Female	55	Slow Death	Skin	Skin - Sun Exposed (Lower leg)
GTEX-131XW-0526-SM-5PNXZ	GTEX-131XW	0.0922581	Female	55	Slow Death	Adipose Tissue	Adipose - Subcutaneous
GTEX-131XW-0626-SM-5PNVD	GTEX-131XW	0.292606	Female	55	Slow Death	Skin	Skin - Not Sun Exposed (Suprapubic)
GTEX-131XW-0726-SM-5EGK3	GTEX-131XW	0.234184	Female	55	Slow Death	Breast	Breast - Mammary Tissue
GTEX-131XW-1126-SM-5EGK4	GTEX-131XW	0.0334946	Female	55	Slow Death	Lung	Lung
GTEX-131XW-2226-SM-5PNY1	GTEX-131XW	0.0589774	Female	55	Slow Death	Blood Vessel	Artery - Aorta
GTEX-131XW-3126-SM-5LZUC	GTEX-131XW	0.449023	Female	55	Slow Death	Brain	Brain - Cortex
GTEX-131XW-3226-SM-5LZUO	GTEX-131XW	0.334388	Female	55	Slow Death	Pituitary	Pituitary
GTEX-131YS-0005-SM-5NQAS	GTEX-131YS	0.515501	Female	65	Fast Death of Natural Causes	Blood	Whole Blood
GTEX-131YS-0008-SM-5YY9Z	GTEX-131YS	0.422365	Female	65	Fast Death of Natural Causes	Skin	Cells - Cultured fibroblasts
GTEX-131YS-0011-R10b-SM-5EQ5N	GTEX-131YS	0.514763	Female	65	Fast Death of Natural Causes	Brain	Brain - Frontal Cortex (BA9)
GTEX-131YS-0011-R11b-SM-5EGLM	GTEX-131YS	0.567813	Female	65	Fast Death of Natural Causes	Brain	Brain - Cerebellar Hemisphere
GTEX-131YS-0011-R1a-SM-5DUXC	GTEX-131YS	0.396576	Female	65	Fast Death of Natural Causes	Brain	Brain - Hippocampus
GTEX-131YS-0011-R3b-SM-5DUXB	GTEX-131YS	0.510652	Female	65	Fast Death of Natural Causes	Brain	Brain - Anterior cingulate cortex (BA24)
GTEX-131YS-0011-R4a-SM-5DUVL	GTEX-131YS	0.452587	Female	65	Fast Death of Natural Causes	Brain	Brain - Amygdala
GTEX-131YS-0011-R5b-SM-5K7YB	GTEX-131YS	0.48071	Female	65	Fast Death of Natural Causes	Brain	Brain - Caudate (basal ganglia)
GTEX-131YS-0011-R7a-SM-5IJDA	GTEX-131YS	0.495849	Female	65	Fast Death of Natural Causes	Brain	Brain - Putamen (basal ganglia)
GTEX-131YS-0011-R9b-SM-5EQLY	GTEX-131YS	0.398554	Female	65	Fast Death of Natural Causes	Brain	Brain - Spinal cord (cervical c-1)
GTEX-131YS-0126-SM-5KM1M	GTEX-131YS	0.324513	Female	65	Fast Death of Natural Causes	Skin	Skin - Sun Exposed (Lower leg)
GTEX-131YS-0226-SM-5IJEH	GTEX-131YS	0.104901	Female	65	Fast Death of Natural Causes	Adipose Tissue	Adipose - Subcutaneous
GTEX-131YS-0326-SM-5PNYW	GTEX-131YS	0.106601	Female	65	Fast Death of Natural Causes	Nerve	Nerve - Tibial
GTEX-131YS-0426-SM-5EQ4J	GTEX-131YS	0.0482333	Female	65	Fast Death of Natural Causes	Blood Vessel	Artery - Tibial
GTEX-131YS-0526-SM-5EGKJ	GTEX-131YS	0.375368	Female	65	Fast Death of Natural Causes	Muscle	Muscle - Skeletal
GTEX-131YS-0626-SM-5EGKL	GTEX-131YS	0.182369	Female	65	Fast Death of Natural Causes	Breast	Breast - Mammary Tissue
GTEX-131YS-0726-SM-5P9G9	GTEX-131YS	0.213332	Female	65	Fast Death of Natural Causes	Thyroid	Thyroid
GTEX-131YS-0826-SM-5PNYV	GTEX-131YS	0.136176	Female	65	Fast Death of Natural Causes	Heart	Heart - Atrial Appendage
GTEX-131YS-0926-SM-5IJB9	GTEX-131YS	0.0607113	Female	65	Fast Death of Natural Causes	Lung	Lung
GTEX-131YS-1126-SM-5N9FQ	GTEX-131YS	0.075549	Female	65	Fast Death of Natural Causes	Blood Vessel	Artery - Aorta
GTEX-131YS-1226-SM-5K7VE	GTEX-131YS	0.0495986	Female	65	Fast Death of Natural Causes	Blood Vessel	Artery - Coronary
GTEX-131YS-1426-SM-5IJF7	GTEX-131YS	0.35582	Female	65	Fast Death of Natural Causes	Esophagus	Esophagus - Mucosa
GTEX-131YS-1626-SM-5HL6C	GTEX-131YS	0.345706	Female	65	Fast Death of Natural Causes	Liver	Liver
GTEX-131YS-1726-SM-5HL7G	GTEX-131YS	0.079086	Female	65	Fast Death of Natural Causes	Adipose Tissue	Adipose - Visceral (Omentum)
GTEX-131YS-2026-SM-5P9J8	GTEX-131YS	0.214925	Female	65	Fast Death of Natural Causes	Adrenal Gland	Adrenal Gland
GTEX-131YS-2226-SM-5P9G8	GTEX-131YS	0.180447	Female	65	Fast Death of Natural Causes	Ovary	Ovary
GTEX-131YS-2326-SM-5IJFJ	GTEX-131YS	0.144274	Female	65	Fast Death of Natural Causes	Uterus	Uterus
GTEX-131YS-2426-SM-5J2OD	GTEX-131YS	0.0630593	Female	65	Fast Death of Natural Causes	Vagina	Vagina
GTEX-131YS-2826-SM-5EQ47	GTEX-131YS	0.318664	Female	65	Fast Death of Natural Causes	Skin	Skin - Not Sun Exposed (Suprapubic)
GTEX-131YS-2926-SM-5EGKI	GTEX-131YS	0.120667	Female	65	Fast Death of Natural Causes	Colon	Colon - Sigmoid
GTEX-131YS-3026-SM-5EGHY	GTEX-131YS	0.552747	Female	65	Fast Death of Natural Causes	Brain	Brain - Cerebellum
GTEX-131YS-3126-SM-5KLYT	GTEX-131YS	0.509358	Female	65	Fast Death of Natural Causes	Brain	Brain - Cortex
GTEX-131YS-3226-SM-5IFGV	GTEX-131YS	0.372978	Female	65	Fast Death of Natural Causes	Pituitary	Pituitary
GTEX-132AR-0006-SM-5NQ7N	GTEX-132AR	0.505764	Female	55	Ventilator Case	Blood	Whole Blood
GTEX-132AR-0008-SM-62LDH	GTEX-132AR	0.422218	Female	55	Ventilator Case	Skin	Cells - Cultured fibroblasts
GTEX-132AR-0226-SM-5IJBE	GTEX-132AR	0.217659	Female	55	Ventilator Case	Adipose Tissue	Adipose - Subcutaneous
GTEX-132AR-0326-SM-5KM2C	GTEX-132AR	0.30301	Female	55	Ventilator Case	Skin	Skin - Not Sun Exposed (Suprapubic)
GTEX-132AR-0426-SM-5IFH8	GTEX-132AR	0.389395	Female	55	Ventilator Case	Liver	Liver
GTEX-132AR-0526-SM-5J2MJ	GTEX-132AR	0.174188	Female	55	Ventilator Case	Adipose Tissue	Adipose - Visceral (Omentum)
GTEX-132AR-0726-SM-5EQ6J	GTEX-132AR	0.231555	Female	55	Ventilator Case	Blood Vessel	Artery - Tibial
GTEX-132AR-0826-SM-5EGK6	GTEX-132AR	0.209346	Female	55	Ventilator Case	Breast	Breast - Mammary Tissue
GTEX-132AR-1026-SM-5PNVL	GTEX-132AR	0.407391	Female	55	Ventilator Case	Muscle	Muscle - Skeletal
GTEX-132AR-1126-SM-5P9GA	GTEX-132AR	0.233102	Female	55	Ventilator Case	Thyroid	Thyroid
GTEX-132AR-1326-SM-5K7YC	GTEX-132AR	0.136763	Female	55	Ventilator Case	Blood Vessel	Artery - Coronary
GTEX-132AR-1426-SM-5IFF1	GTEX-132AR	0.196343	Female	55	Ventilator Case	Ovary	Ovary
GTEX-132AR-1526-SM-5KM1L	GTEX-132AR	0.134745	Female	55	Ventilator Case	Uterus	Uterus
GTEX-132AR-1726-SM-5EGHQ	GTEX-132AR	0.350417	Female	55	Ventilator Case	Adrenal Gland	Adrenal Gland
GTEX-132AR-1826-SM-5EGHR	GTEX-132AR	0.342911	Female	55	Ventilator Case	Pancreas	Pancreas
GTEX-132AR-1926-SM-5EGK5	GTEX-132AR	0.189046	Female	55	Ventilator Case	Heart	Heart - Atrial Appendage
GTEX-132AR-2026-SM-5IJG4	GTEX-132AR	0.274968	Female	55	Ventilator Case	Heart	Heart - Left Ventricle
GTEX-132AR-2126-SM-5K7XG	GTEX-132AR	0.188683	Female	55	Ventilator Case	Blood Vessel	Artery - Aorta
GTEX-132AR-2226-SM-5J2NT	GTEX-132AR	0.407833	Female	55	Ventilator Case	Esophagus	Esophagus - Mucosa
GTEX-132AR-2326-SM-5IJDY	GTEX-132AR	0.238665	Female	55	Ventilator Case	Esophagus	Esophagus - Muscularis
GTEX-132AR-2426-SM-5IFFD	GTEX-132AR	0.284971	Female	55	Ventilator Case	Stomach	Stomach
GTEX-132AR-2526-SM-5PNVM	GTEX-132AR	0.226878	Female	55	Ventilator Case	Esophagus	Esophagus - Gastroesophageal Junction
GTEX-132AR-2726-SM-5PNVN	GTEX-132AR	0.426219	Female	55	Ventilator Case	Colon	Colon - Transverse
GTEX-132AR-2826-SM-5IJFV	GTEX-132AR	0.202767	Female	55	Ventilator Case	Colon	Colon - Sigmoid
GTEX-132NY-0005-SM-5O9AC	GTEX-132NY	0.503457	Male	65	Violent and Fast Death	Blood	Whole Blood
GTEX-132NY-0008-SM-62LFX	GTEX-132NY	0.318436	Male	65	Violent and Fast Death	Skin	Cells - Cultured fibroblasts
GTEX-132NY-0326-SM-5IJBL	GTEX-132NY	0.291598	Male	65	Violent and Fast Death	Skin	Skin - Sun Exposed (Lower leg)
GTEX-132NY-0526-SM-5EQ4V	GTEX-132NY	0.0720728	Male	65	Violent and Fast Death	Nerve	Nerve - Tibial
GTEX-132NY-0626-SM-5L3D9	GTEX-132NY	0.103202	Male	65	Violent and Fast Death	Blood Vessel	Artery - Tibial
GTEX-132NY-0726-SM-5KLZM	GTEX-132NY	0.326672	Male	65	Violent and Fast Death	Muscle	Muscle - Skeletal
GTEX-132NY-0826-SM-5K7Y7	GTEX-132NY	0.0749032	Male	65	Violent and Fast Death	Breast	Breast - Mammary Tissue
GTEX-132NY-0926-SM-5P9G3	GTEX-132NY	0.415977	Male	65	Violent and Fast Death	Liver	Liver
GTEX-132NY-1026-SM-5P9IY	GTEX-132NY	0.218683	Male	65	Violent and Fast Death	Thyroid	Thyroid
GTEX-132NY-1126-SM-5PNVE	GTEX-132NY	0.0935125	Male	65	Violent and Fast Death	Adipose Tissue	Adipose - Visceral (Omentum)
GTEX-132NY-1226-SM-5PNVF	GTEX-132NY	0.161244	Male	65	Violent and Fast Death	Lung	Lung
GTEX-132NY-1426-SM-5J1MJ	GTEX-132NY	0.153086	Male	65	Violent and Fast Death	Heart	Heart - Atrial Appendage
GTEX-132NY-1726-SM-5EGKK	GTEX-132NY	0.268438	Male	65	Violent and Fast Death	Heart	Heart - Left Ventricle
GTEX-132NY-2026-SM-5L3FM	GTEX-132NY	0.0795297	Male	65	Violent and Fast Death	Esophagus	Esophagus - Gastroesophageal Junction
GTEX-132NY-2226-SM-5J2LZ	GTEX-132NY	0.275963	Male	65	Violent and Fast Death	Adrenal Gland	Adrenal Gland
GTEX-132NY-2726-SM-5PNY2	GTEX-132NY	0.0896066	Male	65	Violent and Fast Death	Colon	Colon - Sigmoid
GTEX-132NY-2826-SM-5P9G2	GTEX-132NY	0.235584	Male	65	Violent and Fast Death	Prostate	Prostate
GTEX-132Q8-0006-SM-5NQA4	GTEX-132Q8	0.447229	Male	65	Slow Death	Blood	Whole Blood
GTEX-132Q8-0008-SM-5ZZUC	GTEX-132Q8	0.165545	Male	65	Slow Death	Skin	Cells - Cultured fibroblasts
GTEX-132Q8-0011-R10b-SM-5DUWZ	GTEX-132Q8	0.478931	Male	65	Slow Death	Brain	Brain - Frontal Cortex (BA9)
GTEX-132Q8-0011-R11b-SM-5DUW9	GTEX-132Q8	0.587748	Male	65	Slow Death	Brain	Brain - Cerebellar Hemisphere
GTEX-132Q8-0011-R1a-SM-5EGLK	GTEX-132Q8	0.333143	Male	65	Slow Death	Brain	Brain - Hippocampus
GTEX-132Q8-0011-R2b-SM-5EQ5Z	GTEX-132Q8	0.33089	Male	65	Slow Death	Brain	Brain - Substantia nigra
GTEX-132Q8-0011-R5a-SM-5IJDM	GTEX-132Q8	0.365037	Male	65	Slow Death	Brain	Brain - Caudate (basal ganglia)
GTEX-132Q8-0011-R6a-SM-5K7YN	GTEX-132Q8	0.444981	Male	65	Slow Death	Brain	Brain - Nucleus accumbens (basal ganglia)
GTEX-132Q8-0011-R7b-SM-5N9F1	GTEX-132Q8	0.400386	Male	65	Slow Death	Brain	Brain - Putamen (basal ganglia)
GTEX-132Q8-0011-R8b-SM-5DUWX	GTEX-132Q8	0.399688	Male	65	Slow Death	Brain	Brain - Hypothalamus
GTEX-132Q8-0526-SM-5IJBQ	GTEX-132Q8	0.11906	Male	65	Slow Death	Blood Vessel	Artery - Tibial
GTEX-132Q8-0626-SM-5L3F3	GTEX-132Q8	0.358474	Male	65	Slow Death	Muscle	Muscle - Skeletal
GTEX-132Q8-1126-SM-5K7XS	GTEX-132Q8	0.102127	Male	65	Slow Death	Heart	Heart - Atrial Appendage
GTEX-132Q8-1426-SM-5EGK7	GTEX-132Q8	0.224439	Male	65	Slow Death	Breast	Breast - Mammary Tissue
GTEX-132Q8-1726-SM-5EGK8	GTEX-132Q8	0.175246	Male	65	Slow Death	Adipose Tissue	Adipose - Visceral (Omentum)
GTEX-132Q8-1826-SM-5EGIY	GTEX-132Q8	0.392263	Male	65	Slow Death	Esophagus	Esophagus - Mucosa
GTEX-132Q8-2926-SM-5IFFP	GTEX-132Q8	0.48211	Male	65	Slow Death	Brain	Brain - Cerebellum
GTEX-132Q8-3026-SM-5PNVG	GTEX-132Q8	0.418823	Male	65	Slow Death	Brain	Brain - Cortex
GTEX-132QS-0001-SM-62LDA	GTEX-132QS	0.882954	Male	65	Ventilator Case	Blood	Cells - EBV-transformed lymphocytes
GTEX-132QS-0005-SM-5LZXK	GTEX-132QS	0.494885	Male	65	Ventilator Case	Blood	Whole Blood
GTEX-132QS-0008-SM-5ZZUB	GTEX-132QS	0.322651	Male	65	Ventilator Case	Skin	Cells - Cultured fibroblasts
GTEX-132QS-0126-SM-5IFH9	GTEX-132QS	0.349534	Male	65	Ventilator Case	Adrenal Gland	Adrenal Gland
GTEX-132QS-0226-SM-5IFFZ	GTEX-132QS	0.361979	Male	65	Ventilator Case	Spleen	Spleen
GTEX-132QS-0326-SM-5IJFN	GTEX-132QS	0.281212	Male	65	Ventilator Case	Thyroid	Thyroid
GTEX-132QS-0426-SM-5KLZ6	GTEX-132QS	0.243409	Male	65	Ventilator Case	Heart	Heart - Left Ventricle
GTEX-132QS-0526-SM-5IJC7	GTEX-132QS	0.204603	Male	65	Ventilator Case	Heart	Heart - Atrial Appendage
GTEX-132QS-0626-SM-62LFM	GTEX-132QS	0.139879	Male	65	Ventilator Case	Blood Vessel	Artery - Aorta
GTEX-132QS-0726-SM-5IJE9	GTEX-132QS	0.233016	Male	65	Ventilator Case	Lung	Lung
GTEX-132QS-0826-SM-5K7WV	GTEX-132QS	0.259341	Male	65	Ventilator Case	Adipose Tissue	Adipose - Visceral (Omentum)
GTEX-132QS-0926-SM-5P9GB	GTEX-132QS	0.396334	Male	65	Ventilator Case	Pancreas	Pancreas
GTEX-132QS-1126-SM-5P9GC	GTEX-132QS	0.239556	Male	65	Ventilator Case	Prostate	Prostate
GTEX-132QS-1226-SM-5P9GD	GTEX-132QS	0.560711	Male	65	Ventilator Case	Testis	Testis
GTEX-132QS-1426-SM-5P9GE	GTEX-132QS	0.43253	Male	65	Ventilator Case	Esophagus	Esophagus - Mucosa
GTEX-132QS-1526-SM-5J2MV	GTEX-132QS	0.208179	Male	65	Ventilator Case	Esophagus	Esophagus - Muscularis
GTEX-132QS-1626-SM-5K7YZ	GTEX-132QS	0.185068	Male	65	Ventilator Case	Esophagus	Esophagus - Gastroesophageal Junction
GTEX-132QS-1826-SM-5IFFN	GTEX-132QS	0.343985	Male	65	Ventilator Case	Stomach	Stomach
GTEX-132QS-2426-SM-62LFI	GTEX-132QS	0.190172	Male	65	Ventilator Case	Nerve	Nerve - Tibial
GTEX-132QS-2526-SM-62LFJ	GTEX-132QS	0.228407	Male	65	Ventilator Case	Adipose Tissue	Adipose - Subcutaneous
GTEX-1339X-0005-SM-5O9CQ	GTEX-1339X	0.488807	Male	45	Ventilator Case	Blood	Whole Blood
GTEX-1339X-0008-SM-5ZZUL	GTEX-1339X	0.172446	Male	45	Ventilator Case	Skin	Cells - Cultured fibroblasts
GTEX-1339X-0326-SM-5K7Z8	GTEX-1339X	0.238485	Male	45	Ventilator Case	Heart	Heart - Atrial Appendage
GTEX-1339X-0426-SM-5KLZY	GTEX-1339X	0.276482	Male	45	Ventilator Case	Heart	Heart - Left Ventricle
GTEX-1339X-0526-SM-5KLYW	GTEX-1339X	0.169197	Male	45	Ventilator Case	Blood Vessel	Artery - Aorta
GTEX-1339X-0626-SM-5IJER	GTEX-1339X	0.265617	Male	45	Ventilator Case	Lung	Lung
GTEX-1339X-0726-SM-5L3FF	GTEX-1339X	0.320776	Male	45	Ventilator Case	Adipose Tissue	Adipose - Visceral (Omentum)
GTEX-1339X-0826-SM-5J2O6	GTEX-1339X	0.294817	Male	45	Ventilator Case	Adrenal Gland	Adrenal Gland
GTEX-1339X-1026-SM-5IFH5	GTEX-1339X	0.50019	Male	45	Ventilator Case	Pancreas	Pancreas
GTEX-1339X-1126-SM-5J2OI	GTEX-1339X	0.233477	Male	45	Ventilator Case	Esophagus	Esophagus - Gastroesophageal Junction
GTEX-1339X-1426-SM-5K7YO	GTEX-1339X	0.233034	Male	45	Ventilator Case	Stomach	Stomach
GTEX-1339X-1626-SM-5IJDN	GTEX-1339X	0.216875	Male	45	Ventilator Case	Colon	Colon - Transverse
GTEX-1339X-1726-SM-5P9J9	GTEX-1339X	0.227782	Male	45	Ventilator Case	Colon	Colon - Sigmoid
GTEX-1339X-1926-SM-5PNVP	GTEX-1339X	0.477805	Male	45	Ventilator Case	Testis	Testis
GTEX-1339X-2326-SM-5HL5B	GTEX-1339X	0.32749	Male	45	Ventilator Case	Salivary Gland	Minor Salivary Gland
GTEX-1339X-2426-SM-5KLYU	GTEX-1339X	0.481958	Male	45	Ventilator Case	Muscle	Muscle - Skeletal
GTEX-1339X-2626-SM-5K7YX	GTEX-1339X	0.222657	Male	45	Ventilator Case	Blood Vessel	Artery - Tibial
GTEX-1339X-2726-SM-5PNYU	GTEX-1339X	0.329241	Male	45	Ventilator Case	Nerve	Nerve - Tibial
GTEX-133LE-0008-SM-62LDD	GTEX-133LE	0.176922	Female	25	Ventilator Case	Skin	Cells - Cultured fibroblasts
GTEX-133LE-0226-SM-5PNY3	GTEX-133LE	0.084822	Female	25	Ventilator Case	Blood Vessel	Artery - Aorta
GTEX-133LE-0326-SM-5P9G4	GTEX-133LE	0.208581	Female	25	Ventilator Case	Thyroid	Thyroid
GTEX-133LE-0526-SM-5N9EJ	GTEX-133LE	0.188356	Female	25	Ventilator Case	Lung	Lung
GTEX-133LE-0626-SM-5IFFJ	GTEX-133LE	0.534866	Female	25	Ventilator Case	Esophagus	Esophagus - Mucosa
GTEX-133LE-0726-SM-5P9IZ	GTEX-133LE	0.129509	Female	25	Ventilator Case	Esophagus	Esophagus - Muscularis
GTEX-133LE-0926-SM-5P9J1	GTEX-133LE	0.281422	Female	25	Ventilator Case	Adipose Tissue	Adipose - Visceral (Omentum)
GTEX-133LE-1226-SM-5IFGC	GTEX-133LE	0.180932	Female	25	Ventilator Case	Ovary	Ovary
GTEX-133LE-1326-SM-5IFGO	GTEX-133LE	0.391344	Female	25	Ventilator Case	Stomach	Stomach
GTEX-133LE-1426-SM-5IFH1	GTEX-133LE	0.431219	Female	25	Ventilator Case	Small Intestine	Small Intestine - Terminal Ileum
GTEX-133LE-1526-SM-5IFEN	GTEX-133LE	0.397005	Female	25	Ventilator Case	Colon	Colon - Transverse
GTEX-133LE-1726-SM-5K7VQ	GTEX-133LE	0.238647	Female	25	Ventilator Case	Breast	Breast - Mammary Tissue
GTEX-133LE-1826-SM-5J1MV	GTEX-133LE	0.352246	Female	25	Ventilator Case	Skin	Skin - Sun Exposed (Lower leg)
GTEX-133LE-1926-SM-5N9FV	GTEX-133LE	0.22384	Female	25	Ventilator Case	Adipose Tissue	Adipose - Subcutaneous
[truncated: 15,384 more rows]
