# Supplementary material for: Evidence of a pan-tissue decline in stemness during human aging
Source: Aging (Albany NY). 2024 Apr 4;16(7):5796–810. doi: 10.18632/aging.205717 (PMC11042951; doi:10.18632/aging.205717)
Supplement: Supplementary Table 5 [file aging-16-205717-s005.xlsx]

## Sheet: Corr. Stemness x Senescence
Supplementary Table 5. Pearson correlations between stemness and senescence for GTEx tissues.
Main senescence signature (Wang et al.)						Alternative senescence signature (SenMayo)
Tissues	Pearson correlation coefficient	p-value	FDR			Tissues	Pearson correlation coefficient	p-value	FDR
Adipose Tissue	-0.439579	1.73966e-23	6.52373e-23			Adipose Tissue	-0.258248	8.51145e-20	1.96418e-19
Adrenal Gland	-0.532315	2.78469e-10	4.39687e-10			Adrenal Gland	-0.218204	0.000414778	0.00059254
Bladder	-0.446963	0.227746	0.235599			Bladder	0.120474	0.602941	0.623732
Blood	-0.488654	1.56972e-19	3.9243e-19			Blood	-0.0750643	0.0392025	0.0511337
Blood Vessel	-0.593435	6.71525e-56	5.03643e-55			Blood Vessel	-0.36772	5.24942e-44	2.24975e-43
Brain	-0.589211	4.89614e-98	7.34422e-97			Brain	-0.134549	3.80601e-12	6.71649e-12
Breast	-0.40206	7.90128e-08	1.18519e-07			Breast	-0.39169	2.79117e-18	5.98108e-18
Cervix Uteri	-0.961667	9.01854e-06	1.12732e-05			Cervix Uteri	-0.618666	0.00474493	0.00647035
Colon	-0.873999	2.54216e-91	2.54216e-90			Colon	-0.671524	2.95083e-103	2.2131e-102
Esophagus	-0.939151	1.61481e-275	4.84444e-274			Esophagus	-0.531463	3.90916e-106	3.9092e-105
Fallopian Tube	-0.80773	0.0982338	0.10525			Fallopian Tube	-0.454384	0.219175	0.243527
Heart	-0.0999767	0.0663811	0.0737568			Heart	-0.364424	1.95503e-28	4.88758e-28
Kidney	0.230982	0.301028	0.301028			Kidney	-0.122612	0.252338	0.270362
Liver	-0.484137	2.90669e-07	3.96367e-07			Liver	0.105853	0.112524	0.140655
Lung	-0.702944	4.0084e-38	2.0042e-37			Lung	-0.309549	2.66247e-14	4.99213e-14
Muscle	-0.422701	1.20618e-16	2.41236e-16			Muscle	-0.402404	1.30775e-32	3.56659e-32
Nerve	-0.51973	2.97441e-19	6.37373e-19			Nerve	0.0153947	0.702265	0.702265
Ovary	-0.697513	3.3179e-13	5.85511e-13			Ovary	-0.367538	3.86544e-07	6.10333e-07
Pancreas	-0.16902	0.0355182	0.0426219			Pancreas	-0.351988	5.32312e-11	8.87187e-11
Pituitary	-0.64398	2.84916e-13	5.34218e-13			Pituitary	-0.808634	1.06764e-66	6.40584e-66
Prostate	-0.512292	1.78854e-07	2.55505e-07			Prostate	-0.256939	4.70728e-05	7.06092e-05
Salivary Gland	-0.610962	2.45098e-06	3.19693e-06			Salivary Gland	-0.117408	0.136768	0.159099
Skin	-0.578183	4.06334e-46	2.43801e-45			Skin	-0.62612	5.6036e-143	1.68108e-141
Small Intestine	-0.776882	1.41976e-19	3.87208e-19			Small Intestine	-0.576891	5.56746e-18	1.11349e-17
Spleen	-0.793684	2.37451e-21	7.91502e-21			Spleen	-0.718127	1.67815e-39	5.59383e-39
Stomach	-0.689649	2.444e-24	1.04743e-23			Stomach	-0.713229	4.75402e-57	2.37701e-56
Testis	0.158623	0.05253	0.0606115			Testis	-0.870119	2.32316e-112	3.4848e-111
Thyroid	-0.542506	4.54962e-21	1.36489e-20			Thyroid	-0.496455	6.22025e-42	2.33259e-41
Uterus	-0.706204	1.46899e-12	2.44832e-12			Uterus	-0.125126	0.137886	0.159099
Vagina	-0.820052	2.28097e-19	5.26377e-19			Vagina	-0.816899	1.229e-38	3.687e-38
